# Supplementary material for: Squaramide-catalyzed asymmetric Michael/cyclization cascade reaction of 3-isothiocyanato oxindoles with chalcones for synthesis of pyrrolidinyl spirooxindoles
Source: Royal Society of Chemistry journal article supplement (doi:10.1039/c6qo00852f), 2017-01-01
Supplement: c6qo00852f1.pdf [file c6qo00852f1.pdf]

**Squaramide-catalyzed asymmetric Michael/cyclization cascade reaction of  
3-isothiocyanato oxindoles with chalcones for synthesis of pyrrolidinyl  
spirooxindoles**

Ye Lin, Lei Liu and Da-Ming Du\*

*School of Chemistry and Chemical Engineering, Beijing Institute of Technology,  
5 South Zhongguancun Street, Beijing 100081, P. R. China  
E-mail: [dudm@bit.edu.cn](mailto:dudm@bit.edu.cn)*

***Supporting Information***

**Contents**

|                                                                              |     |
|------------------------------------------------------------------------------|-----|
| Copies of $^1\text{H}$ and $^{13}\text{C}$ NMR spectra of new compounds..... | S1  |
| Copies of HPLC chromatograms.....                                            | S49 |

Copies of  $^1\text{H}$  and  $^{13}\text{C}$  NMR spectra of new compounds

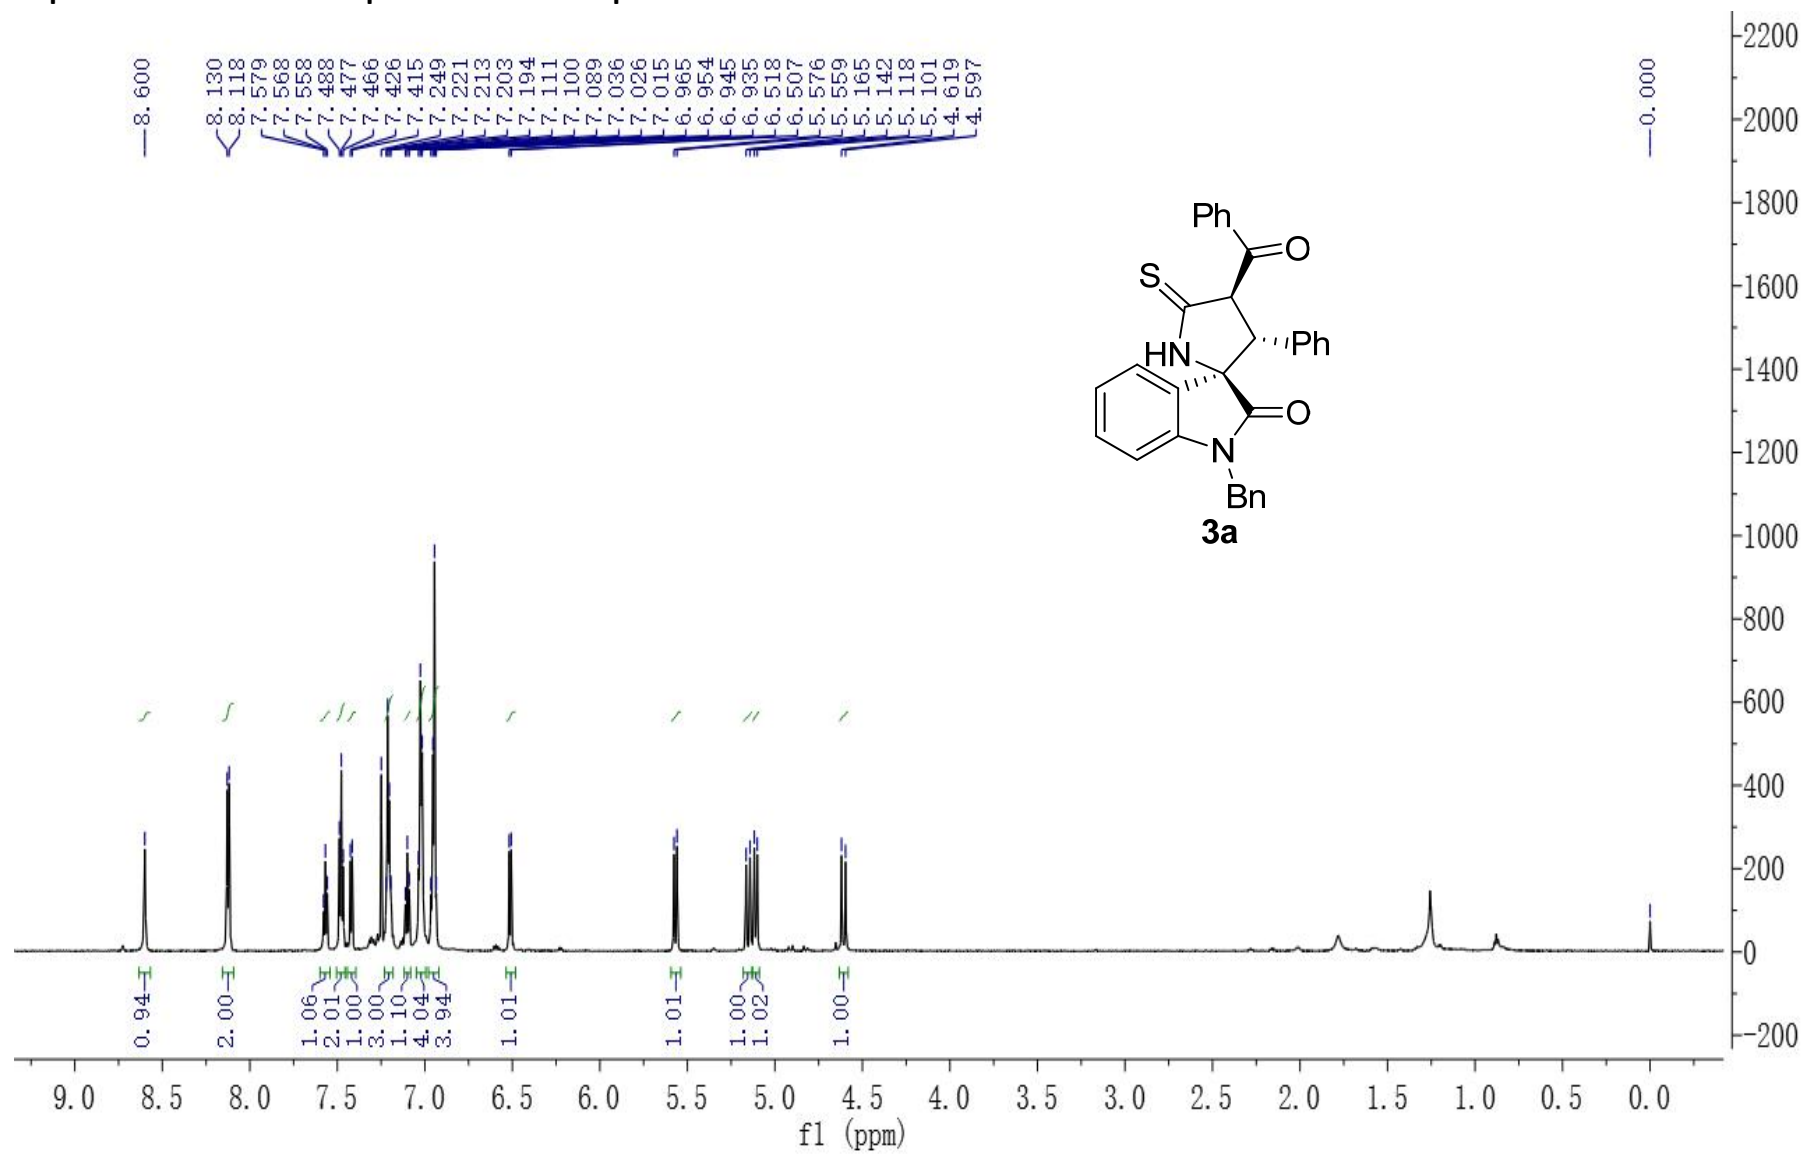

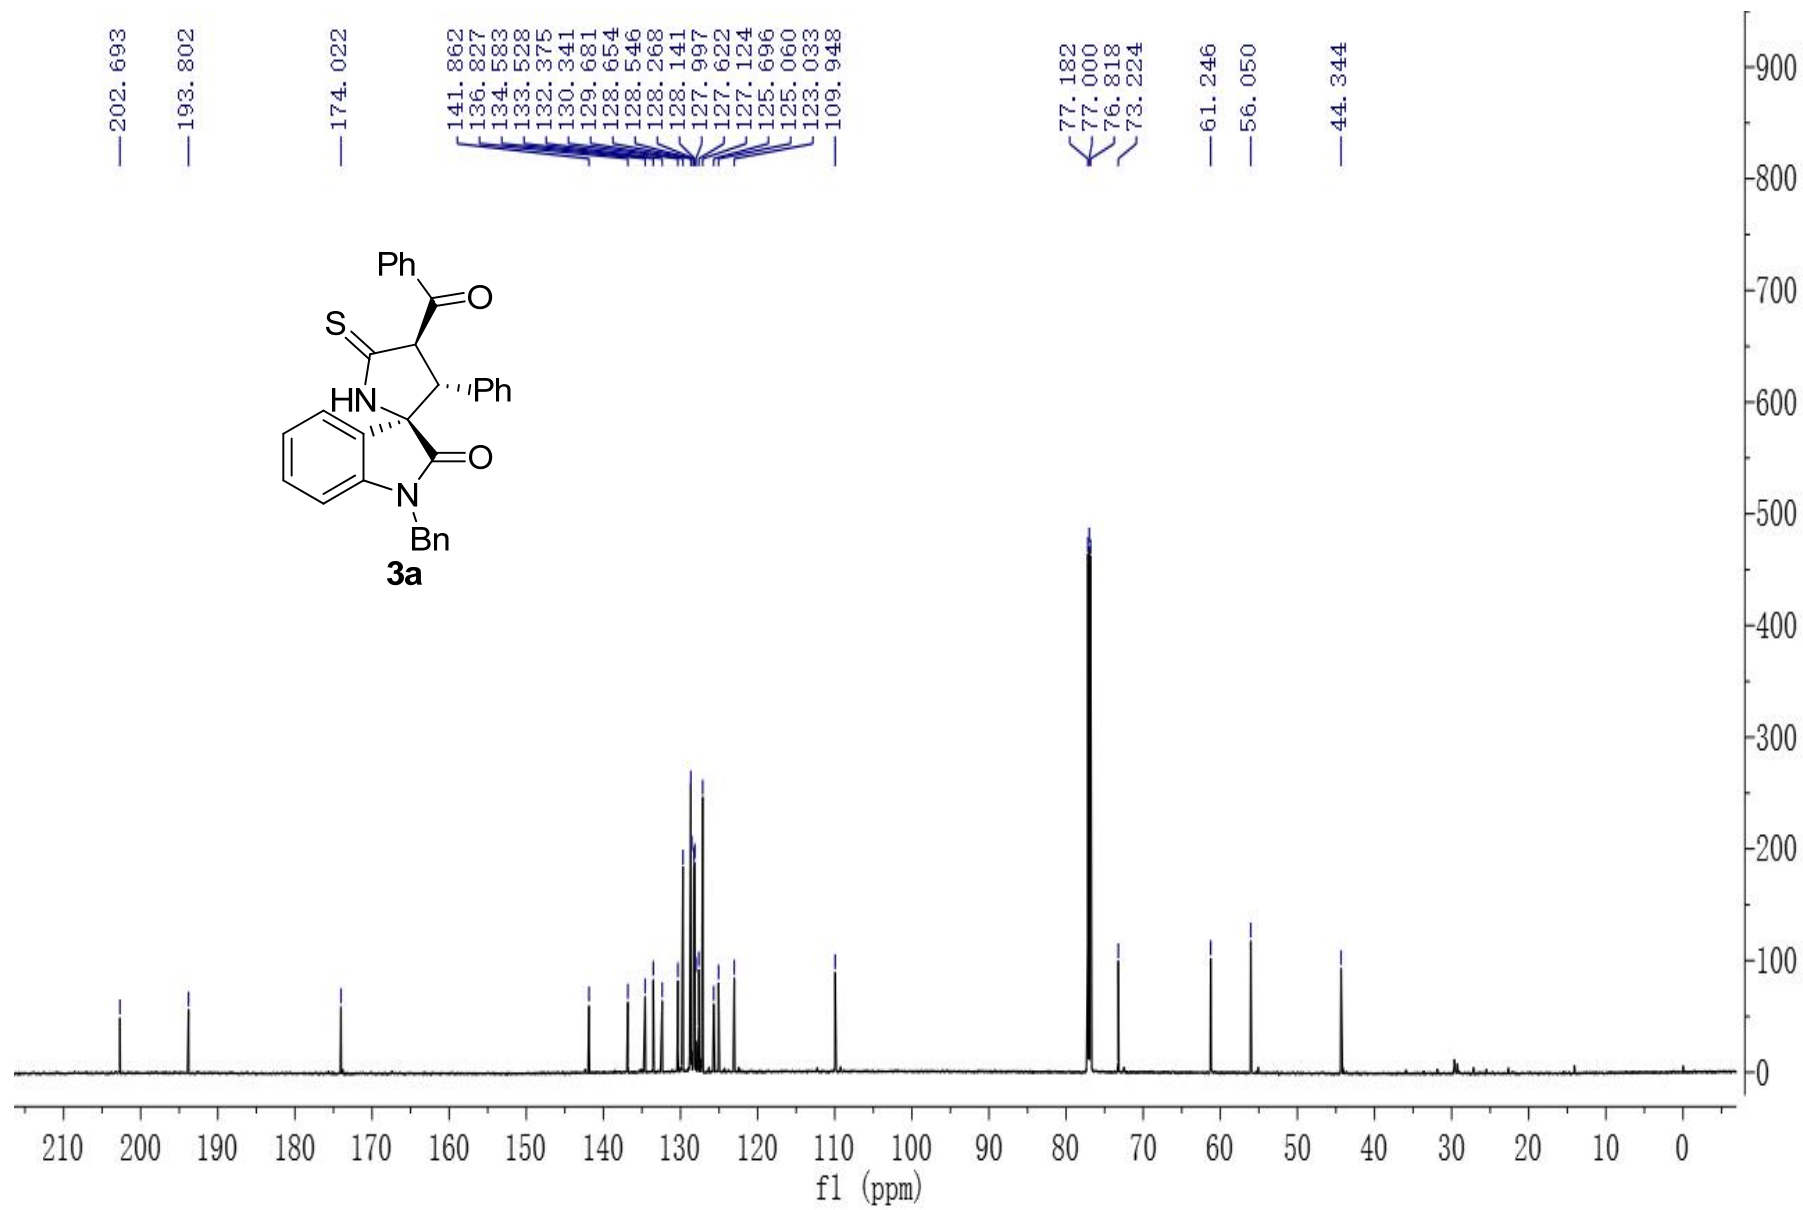

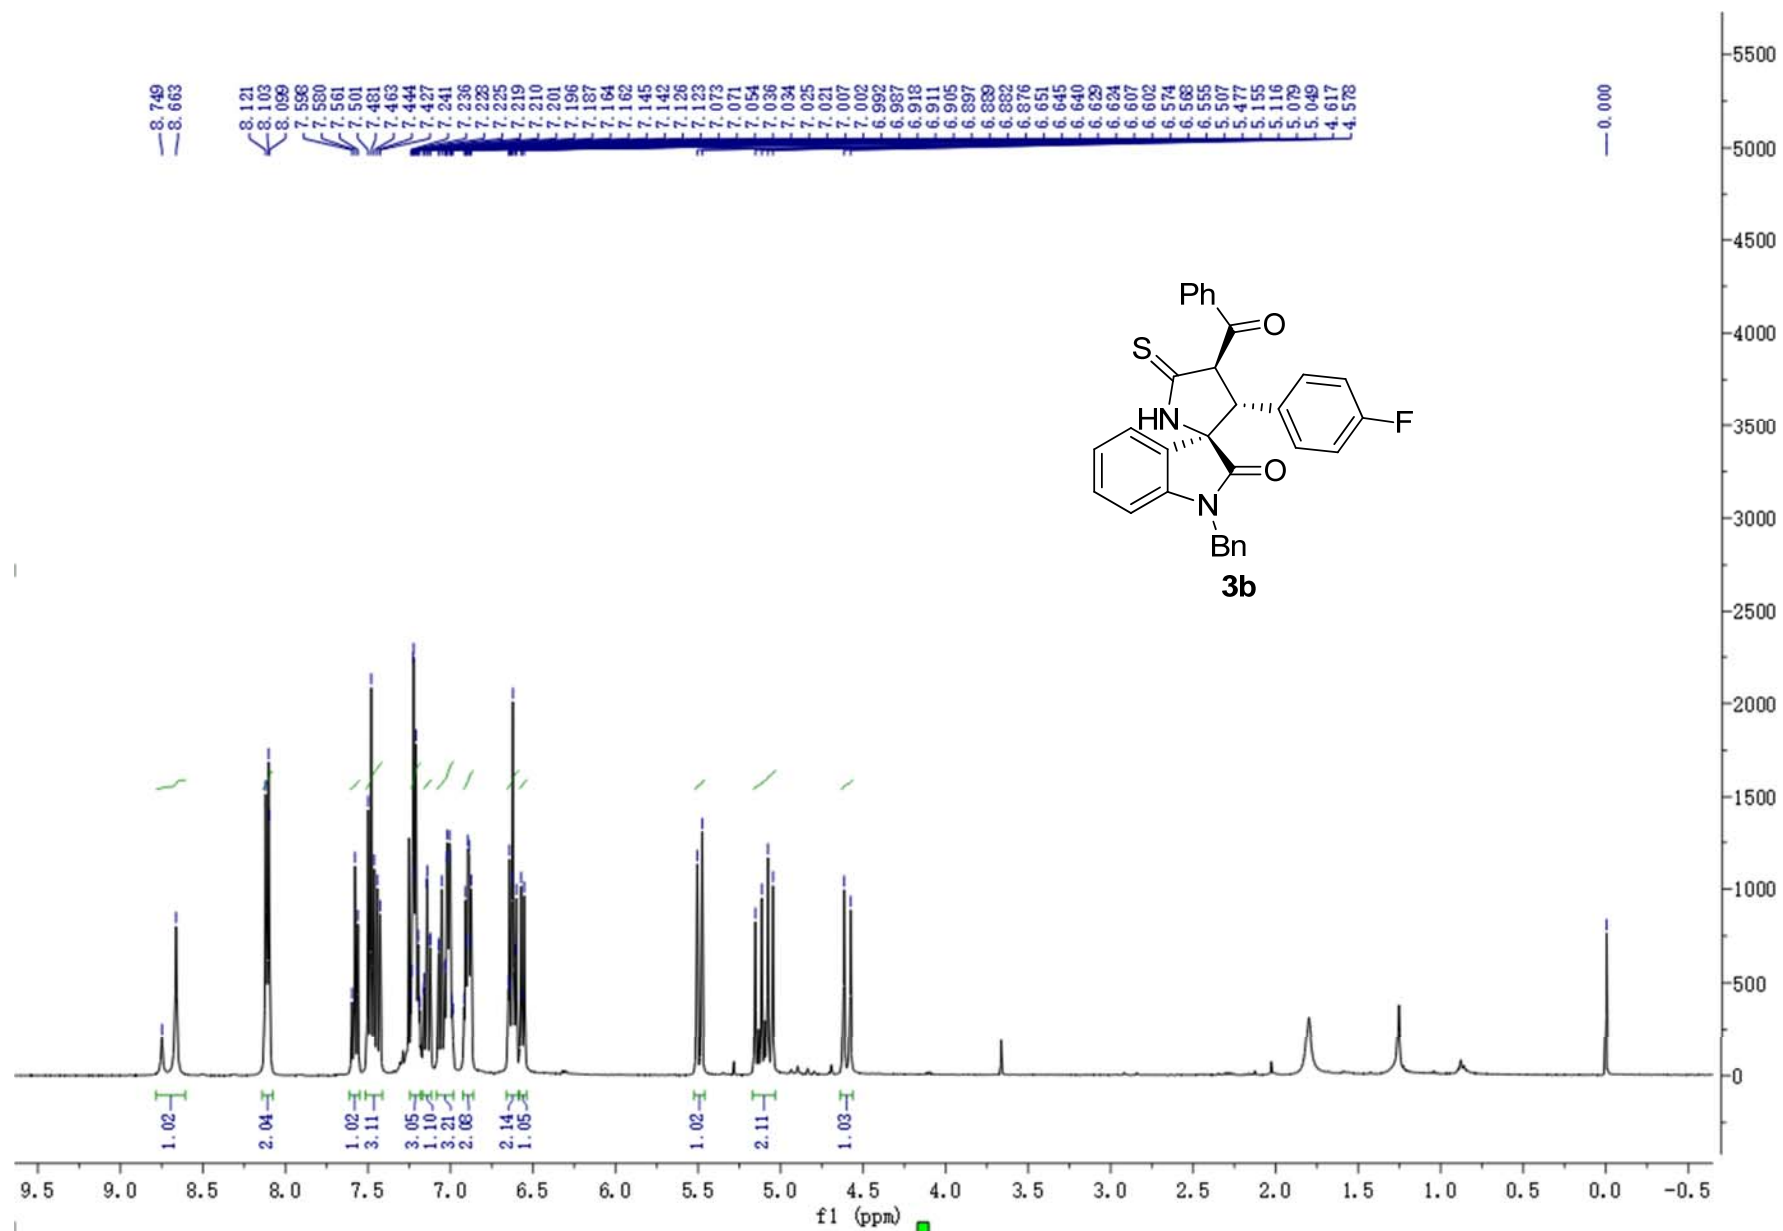



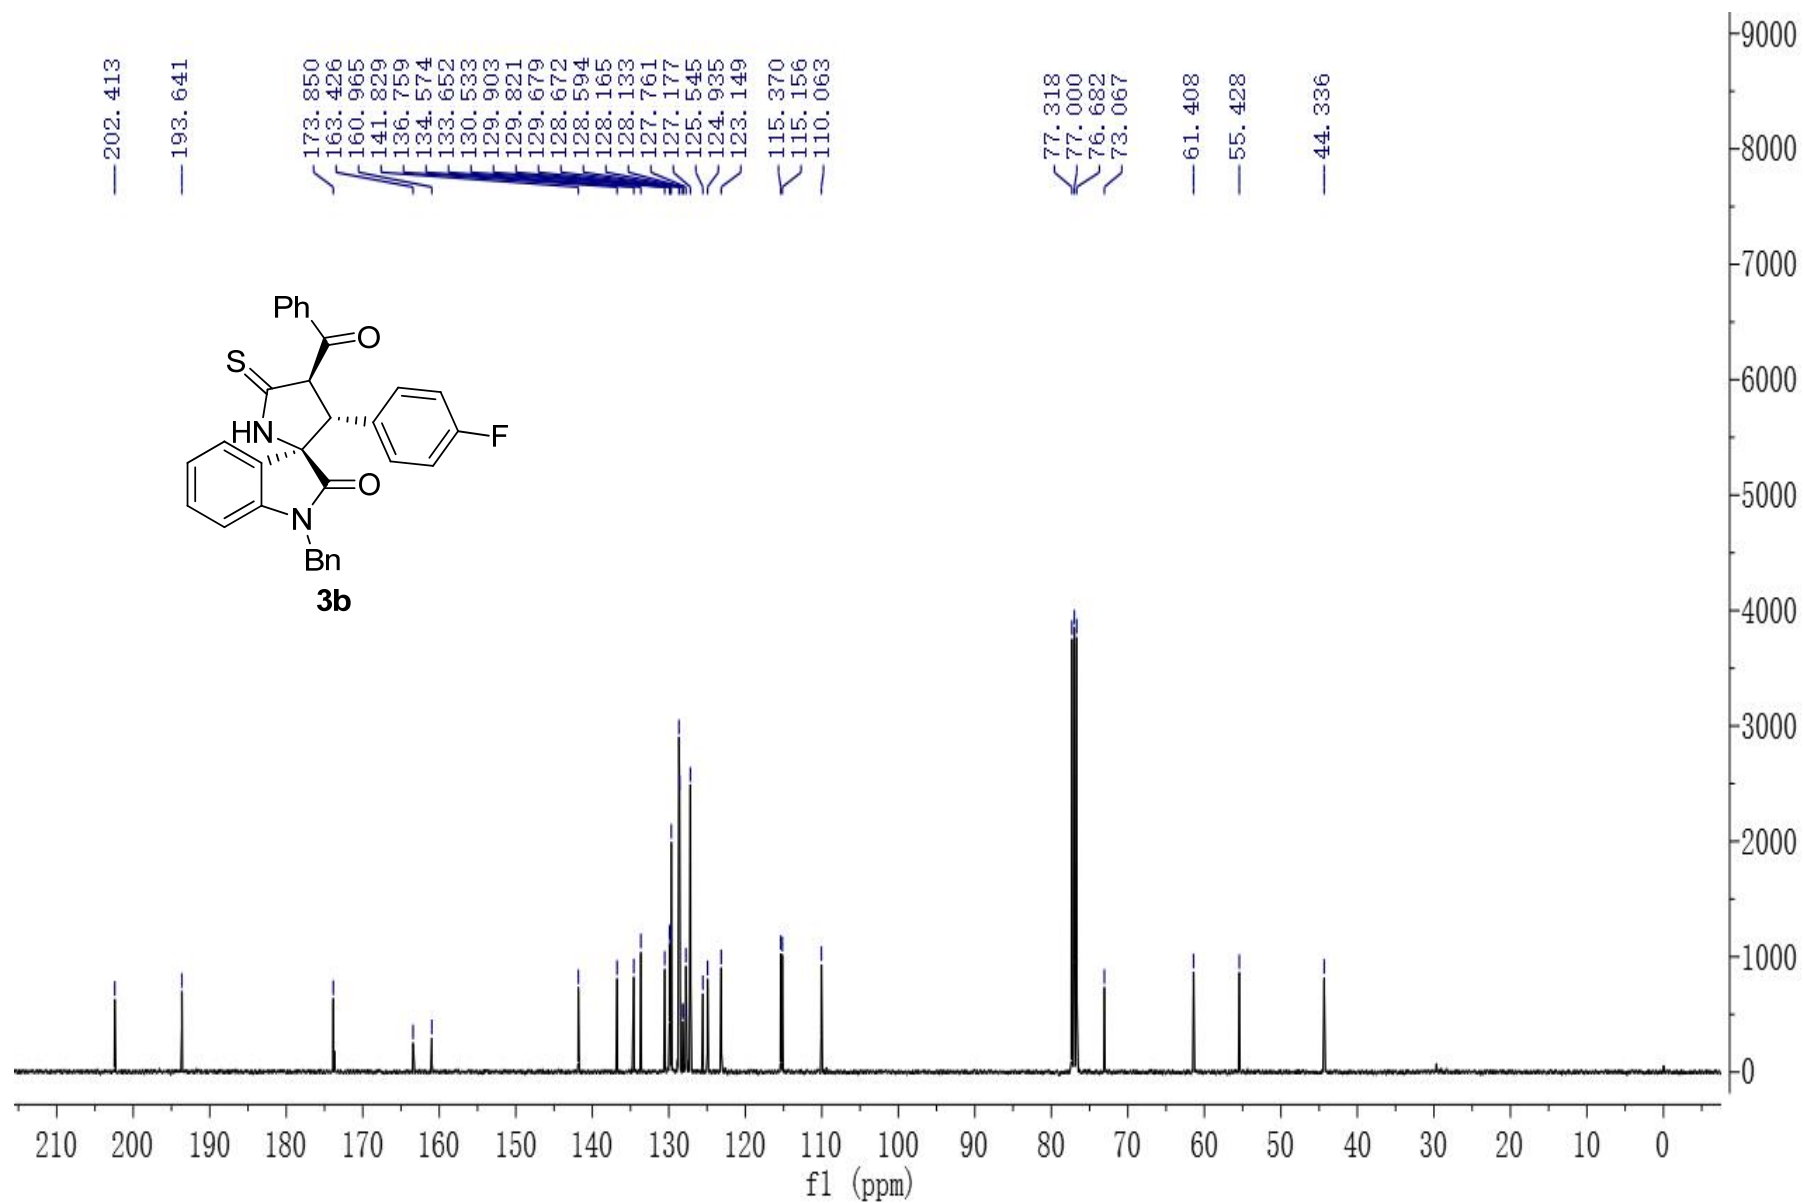

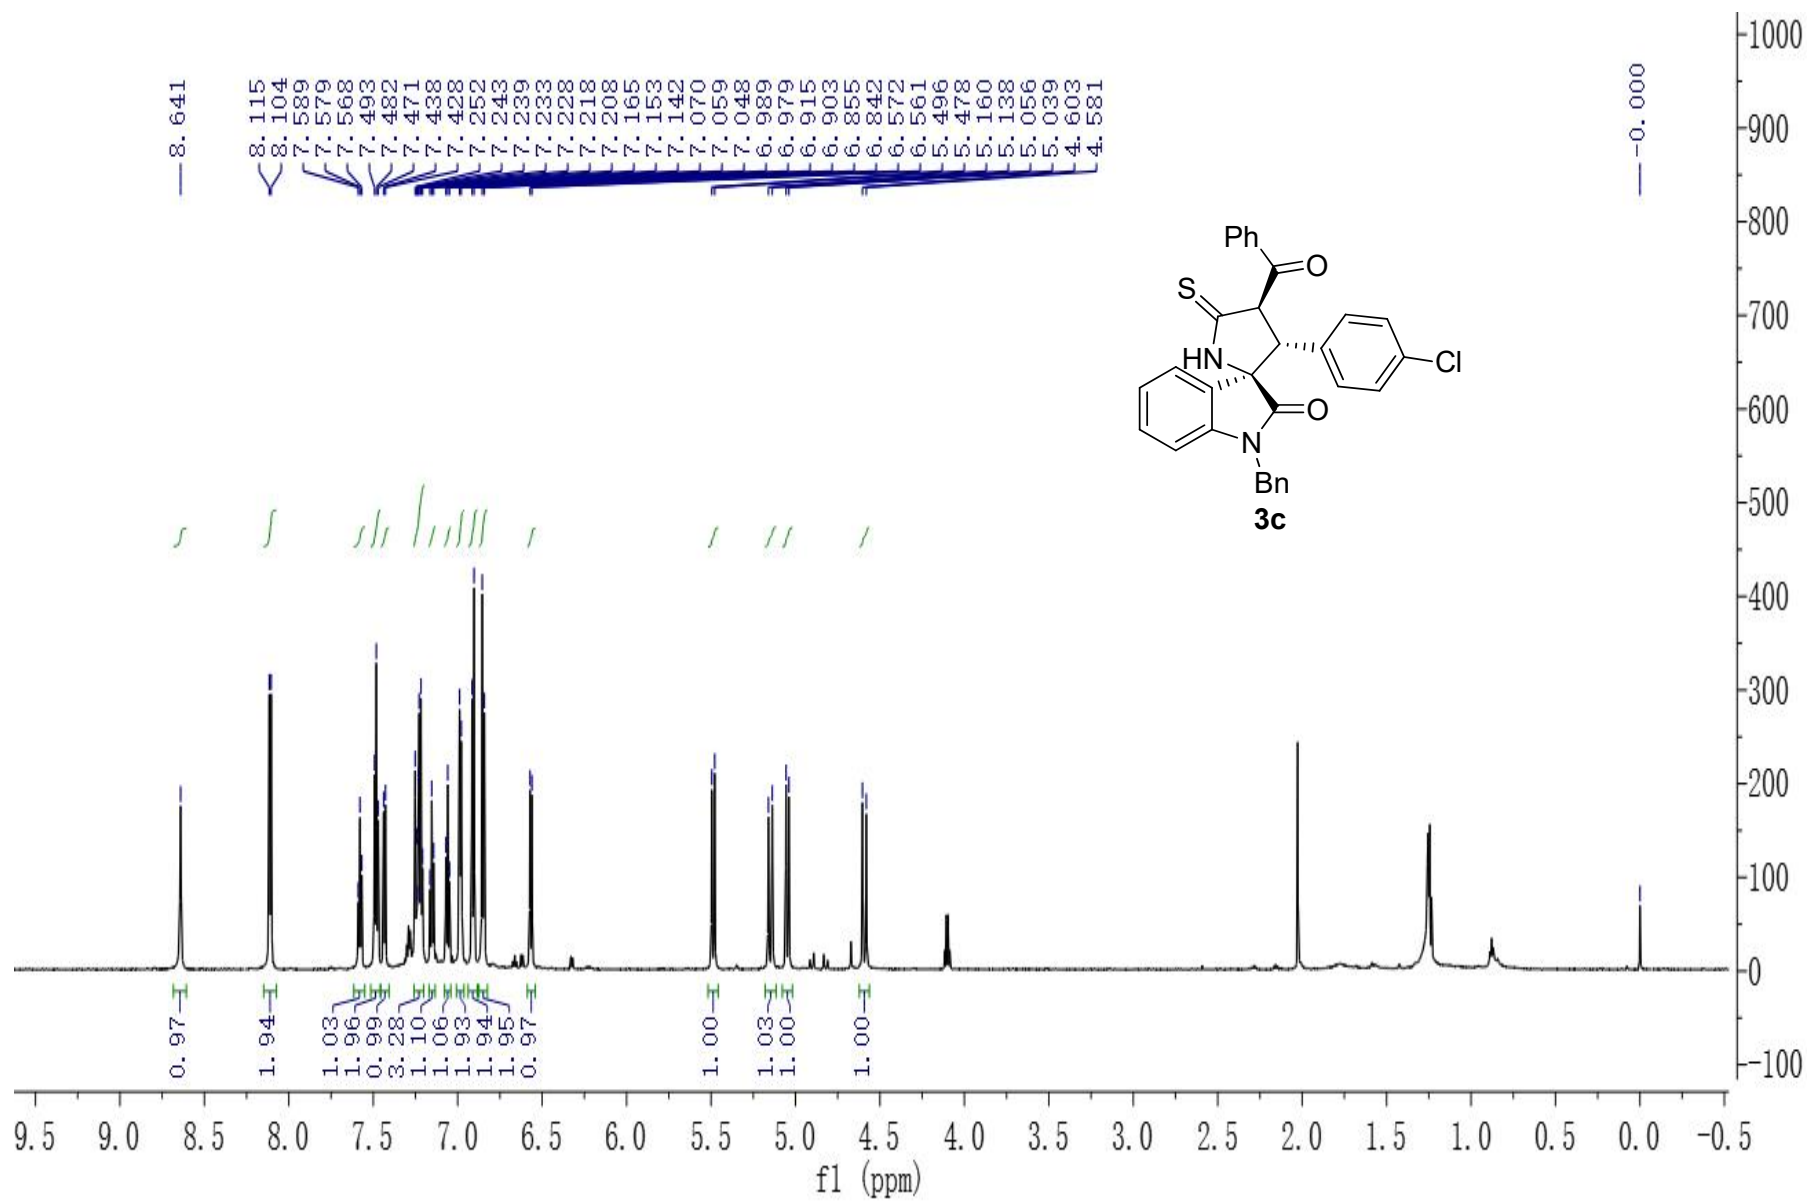

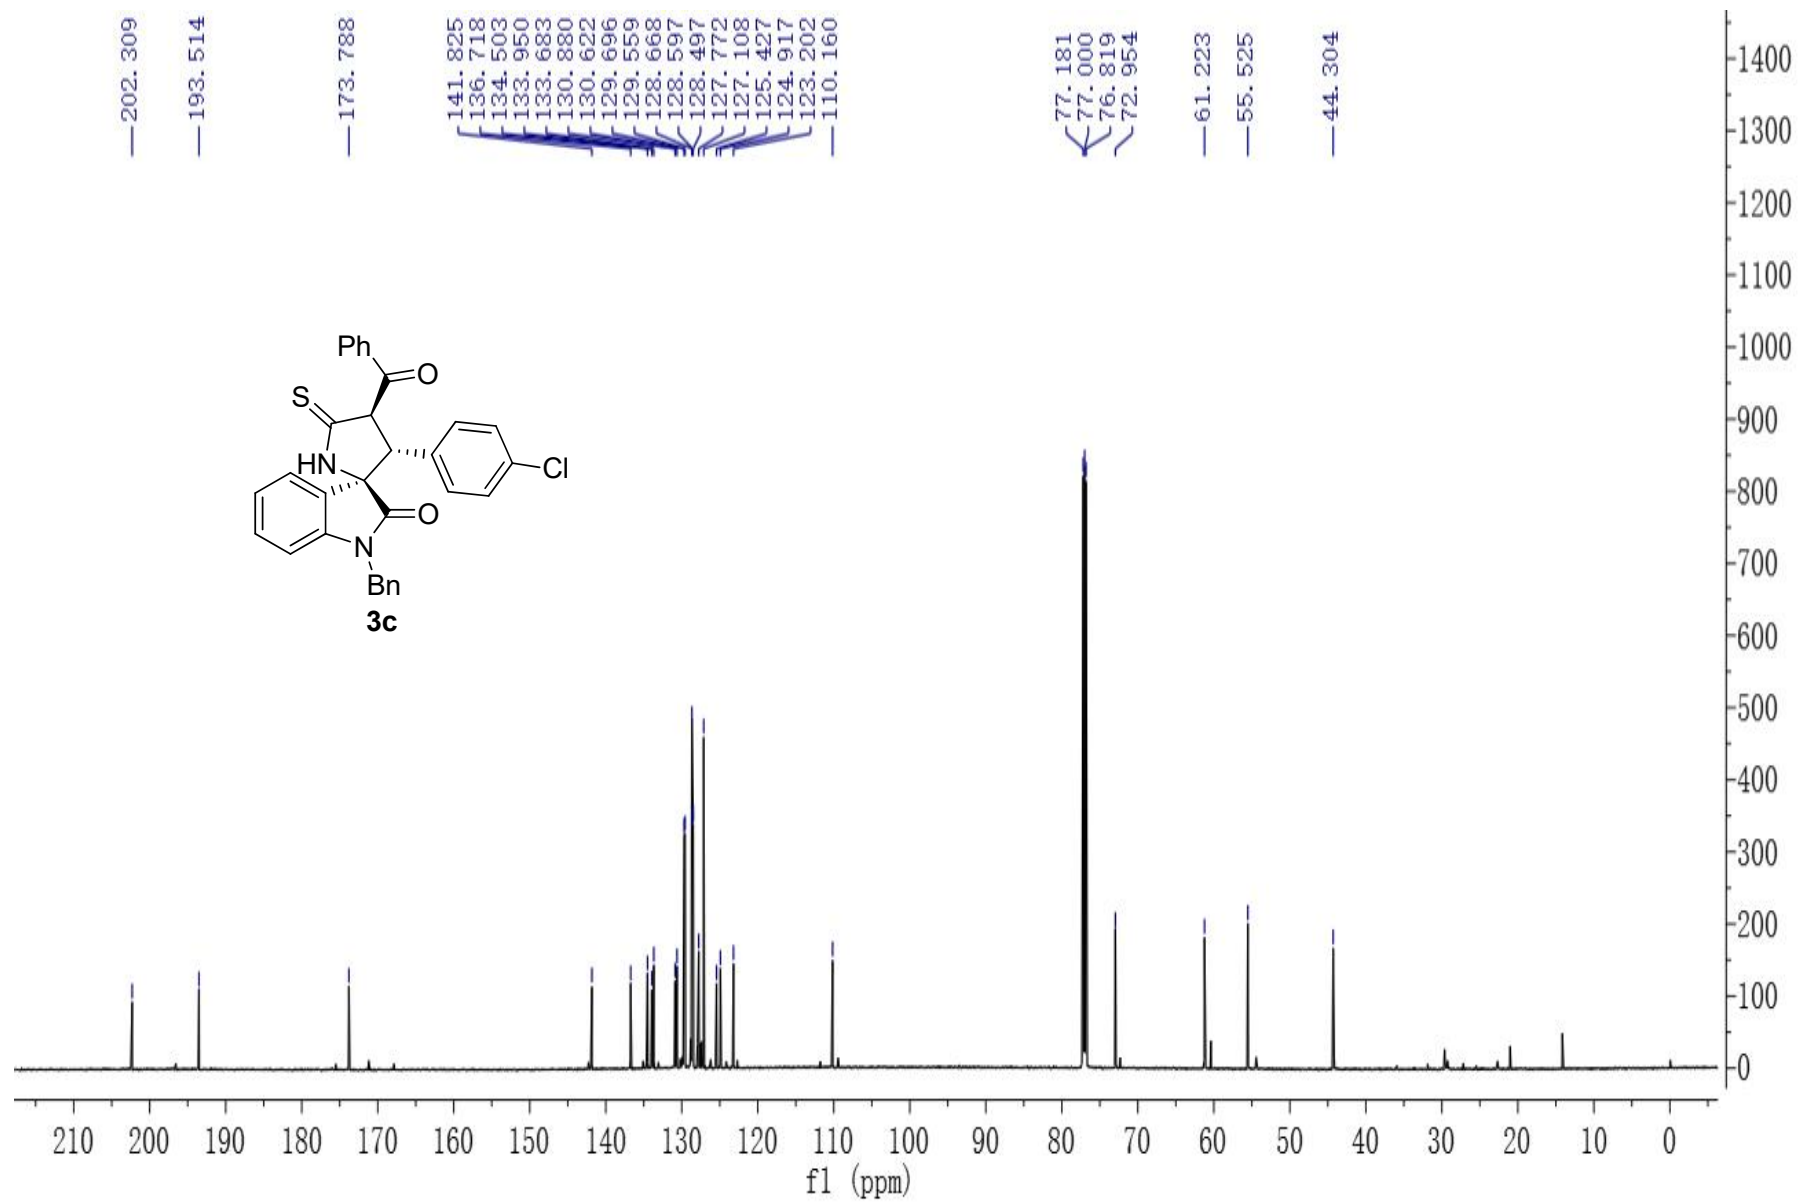

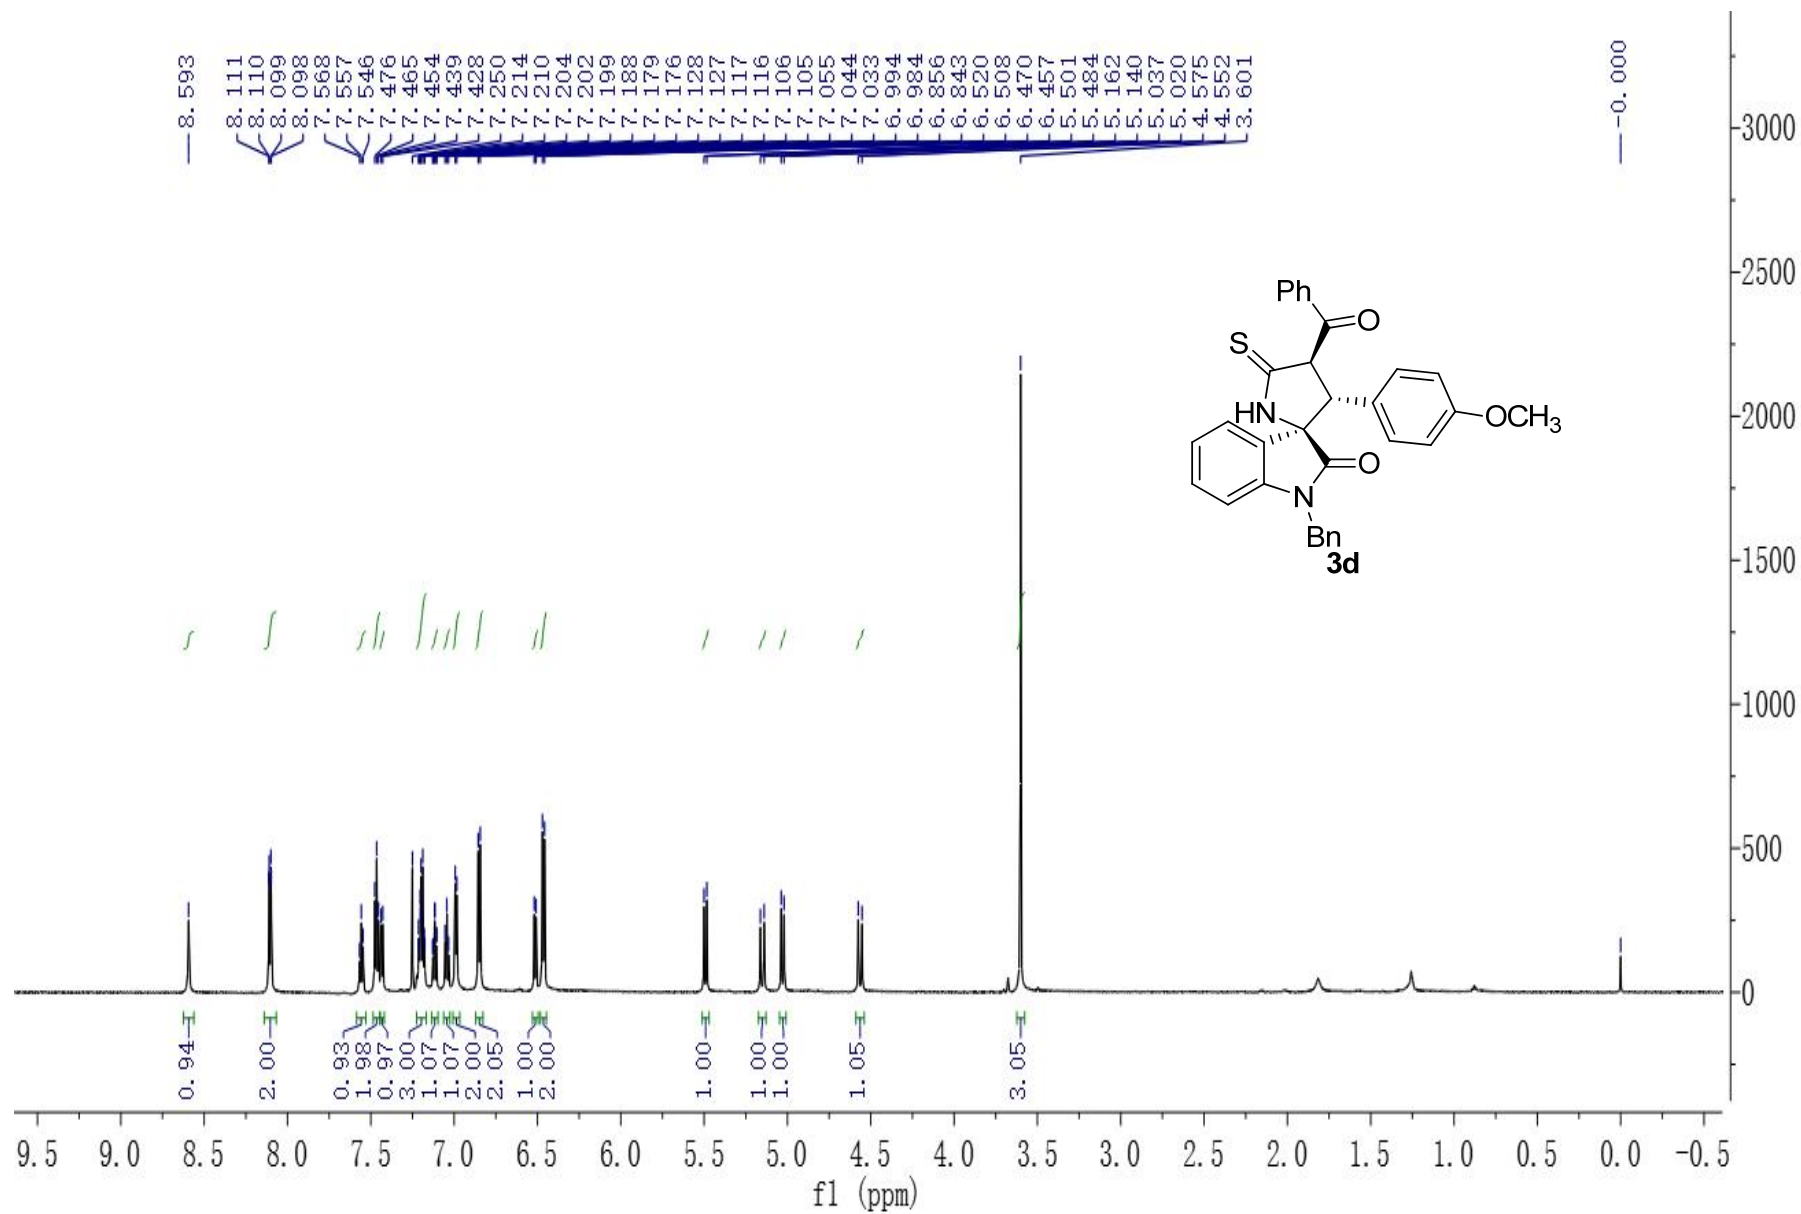

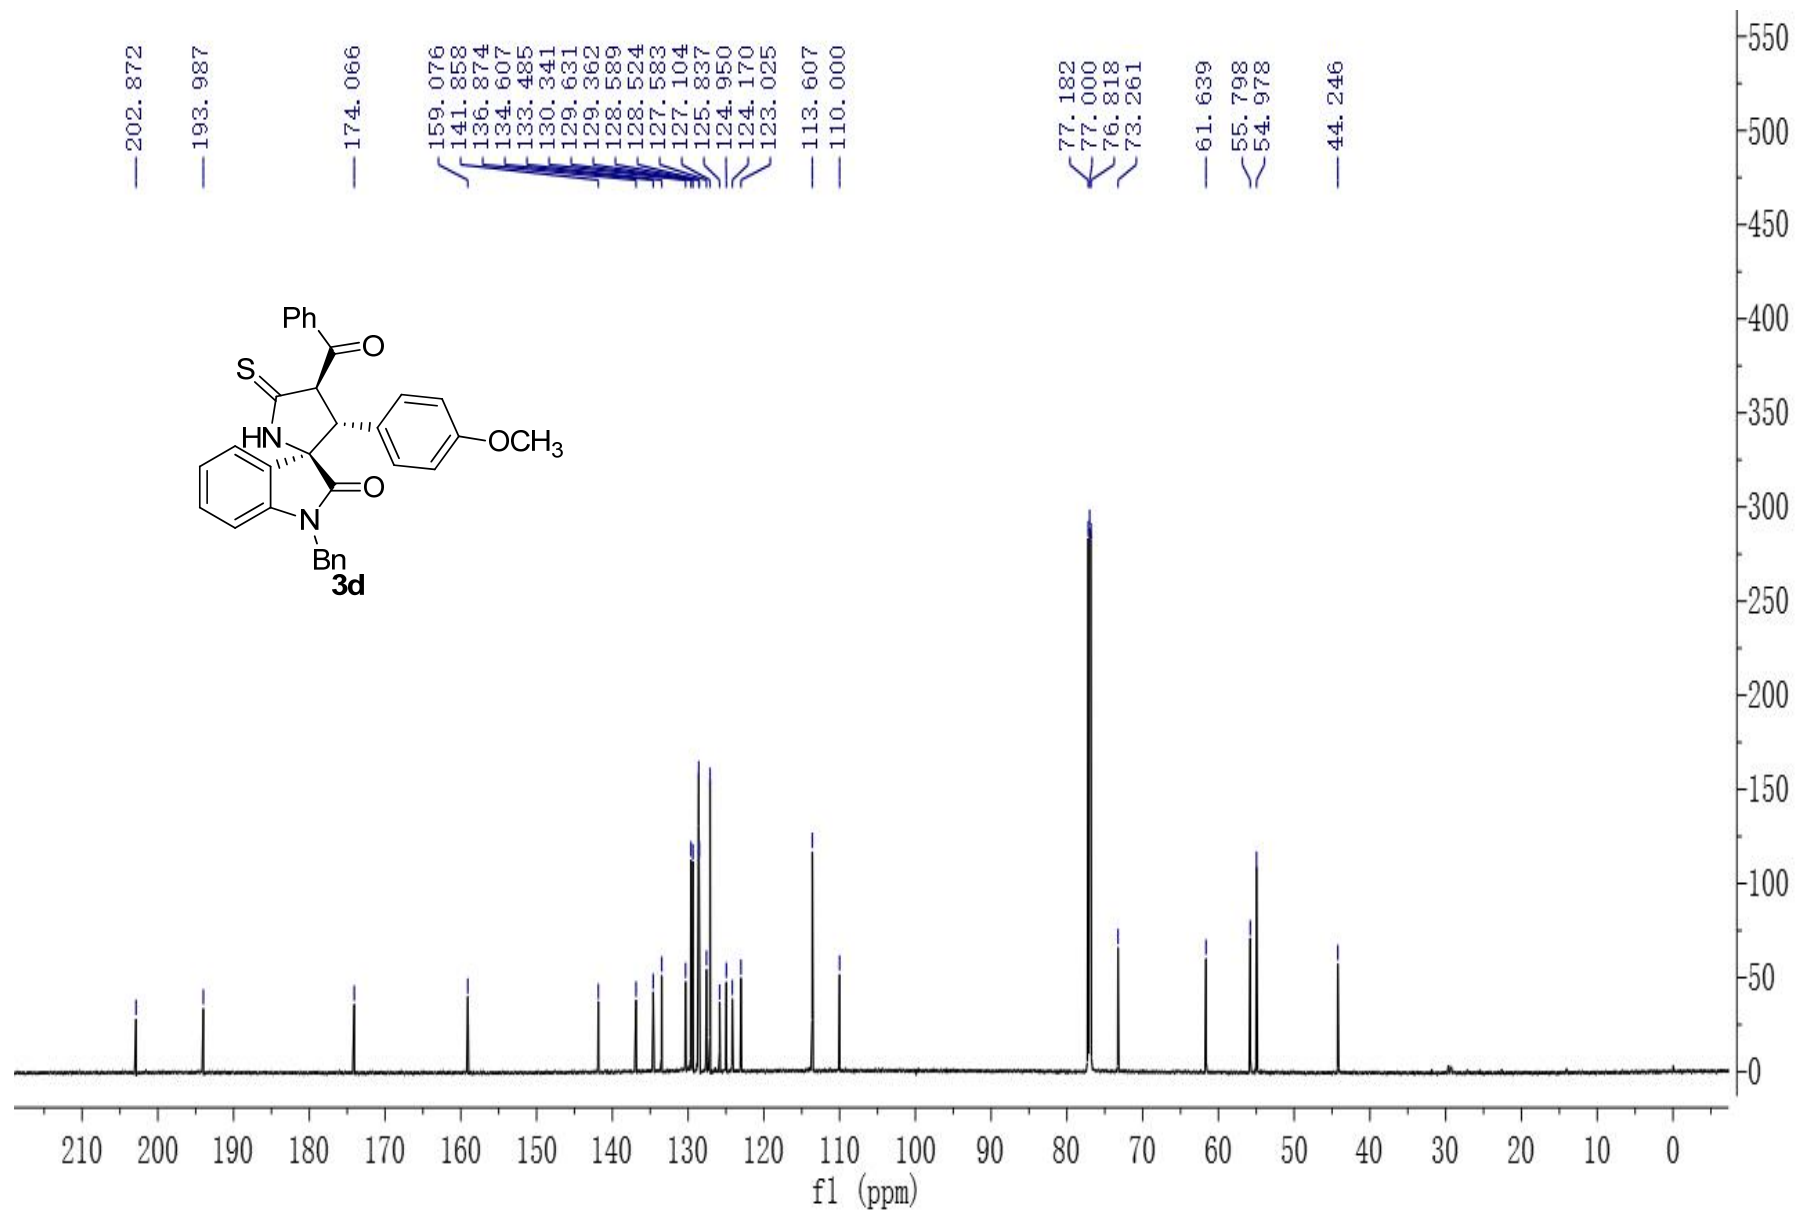

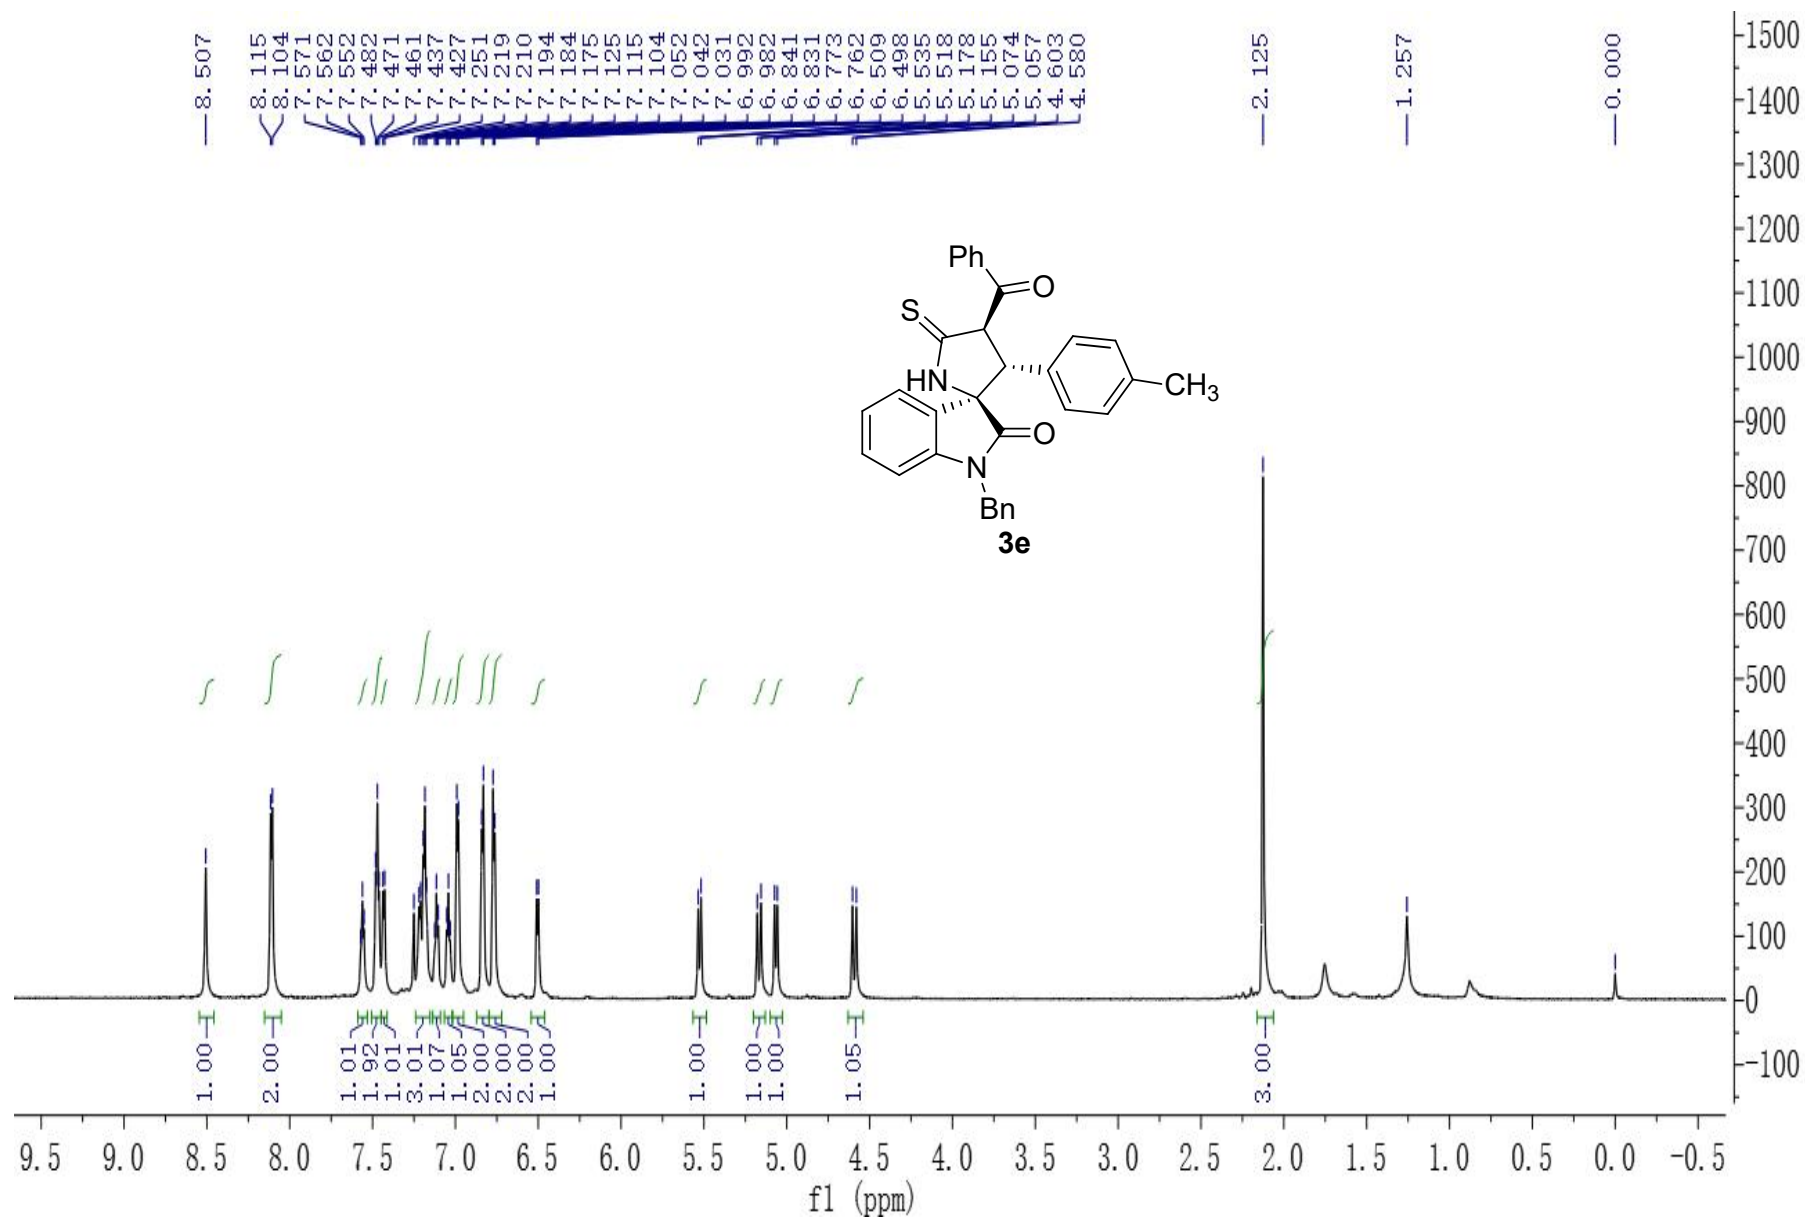

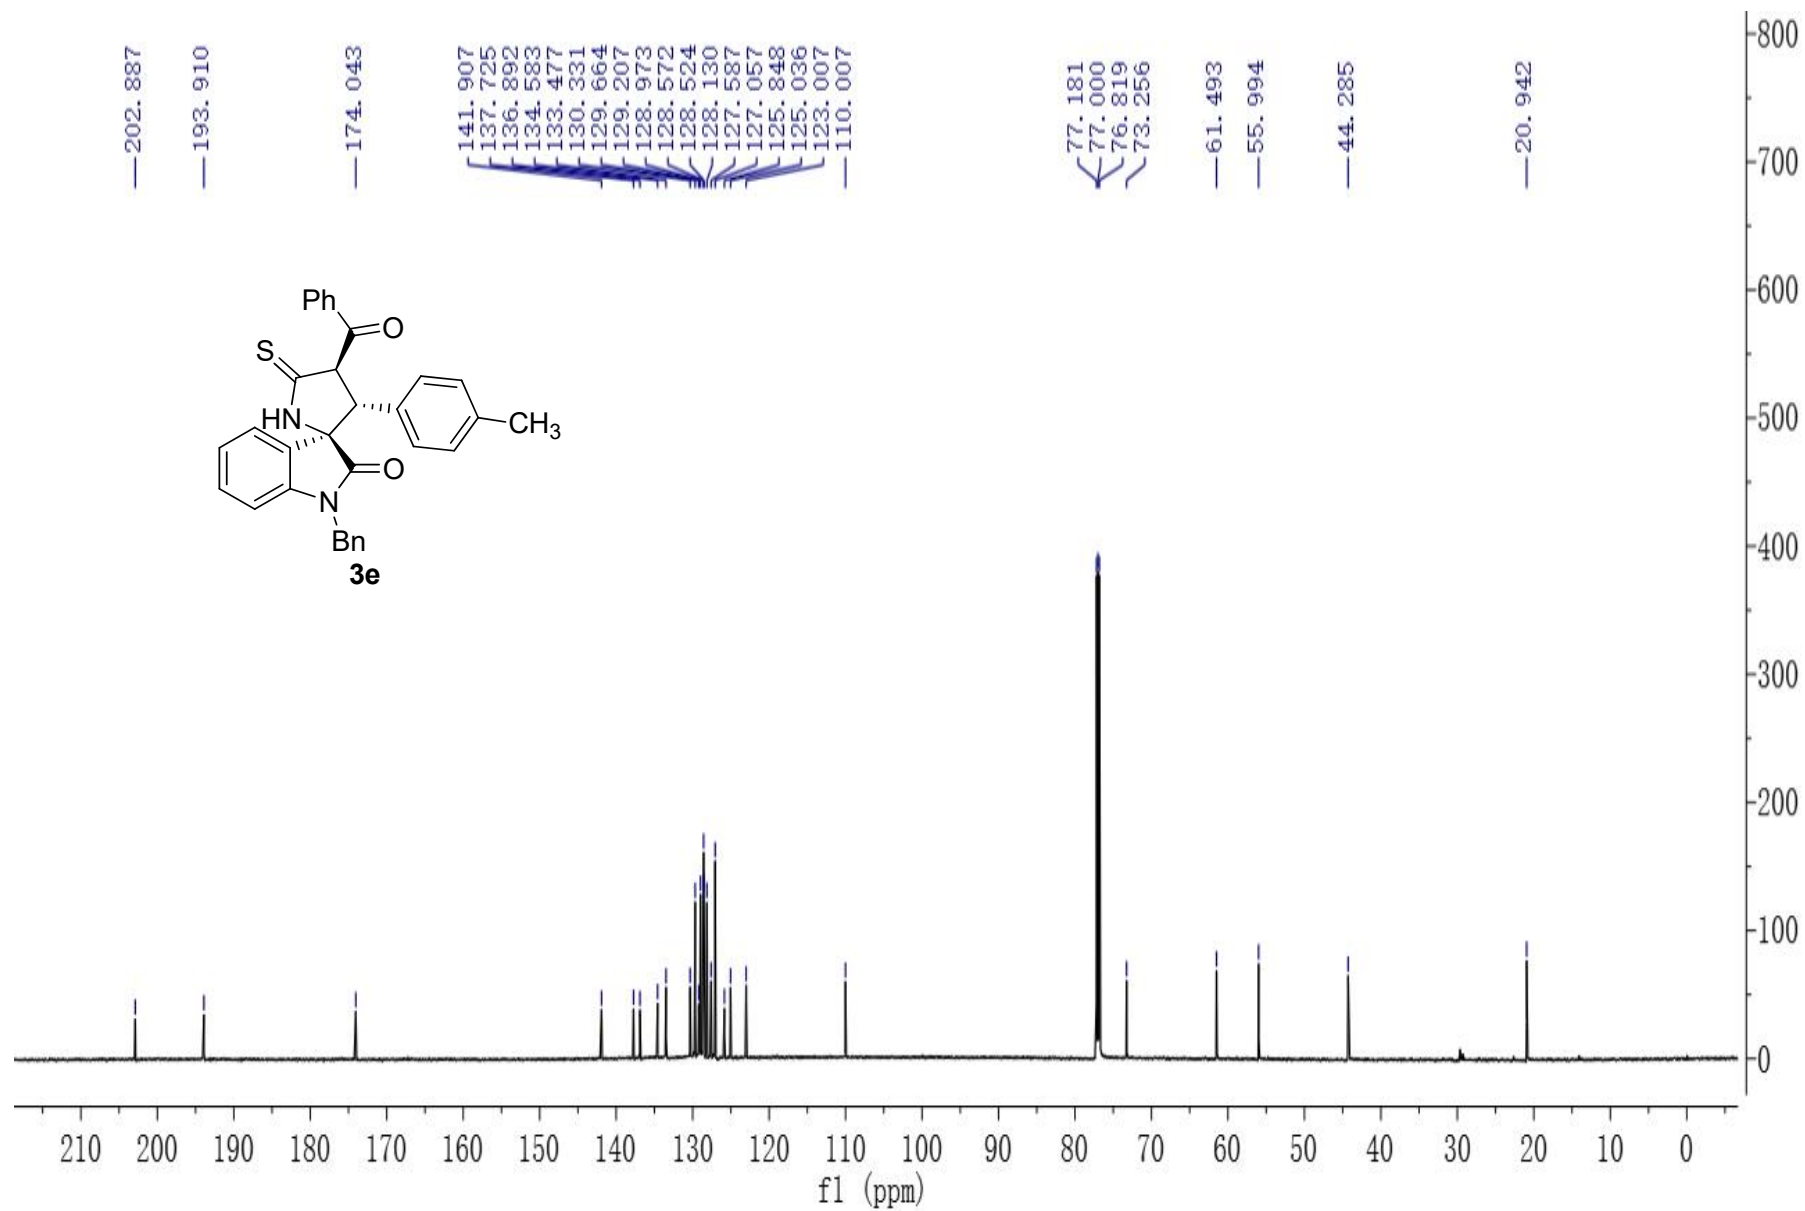







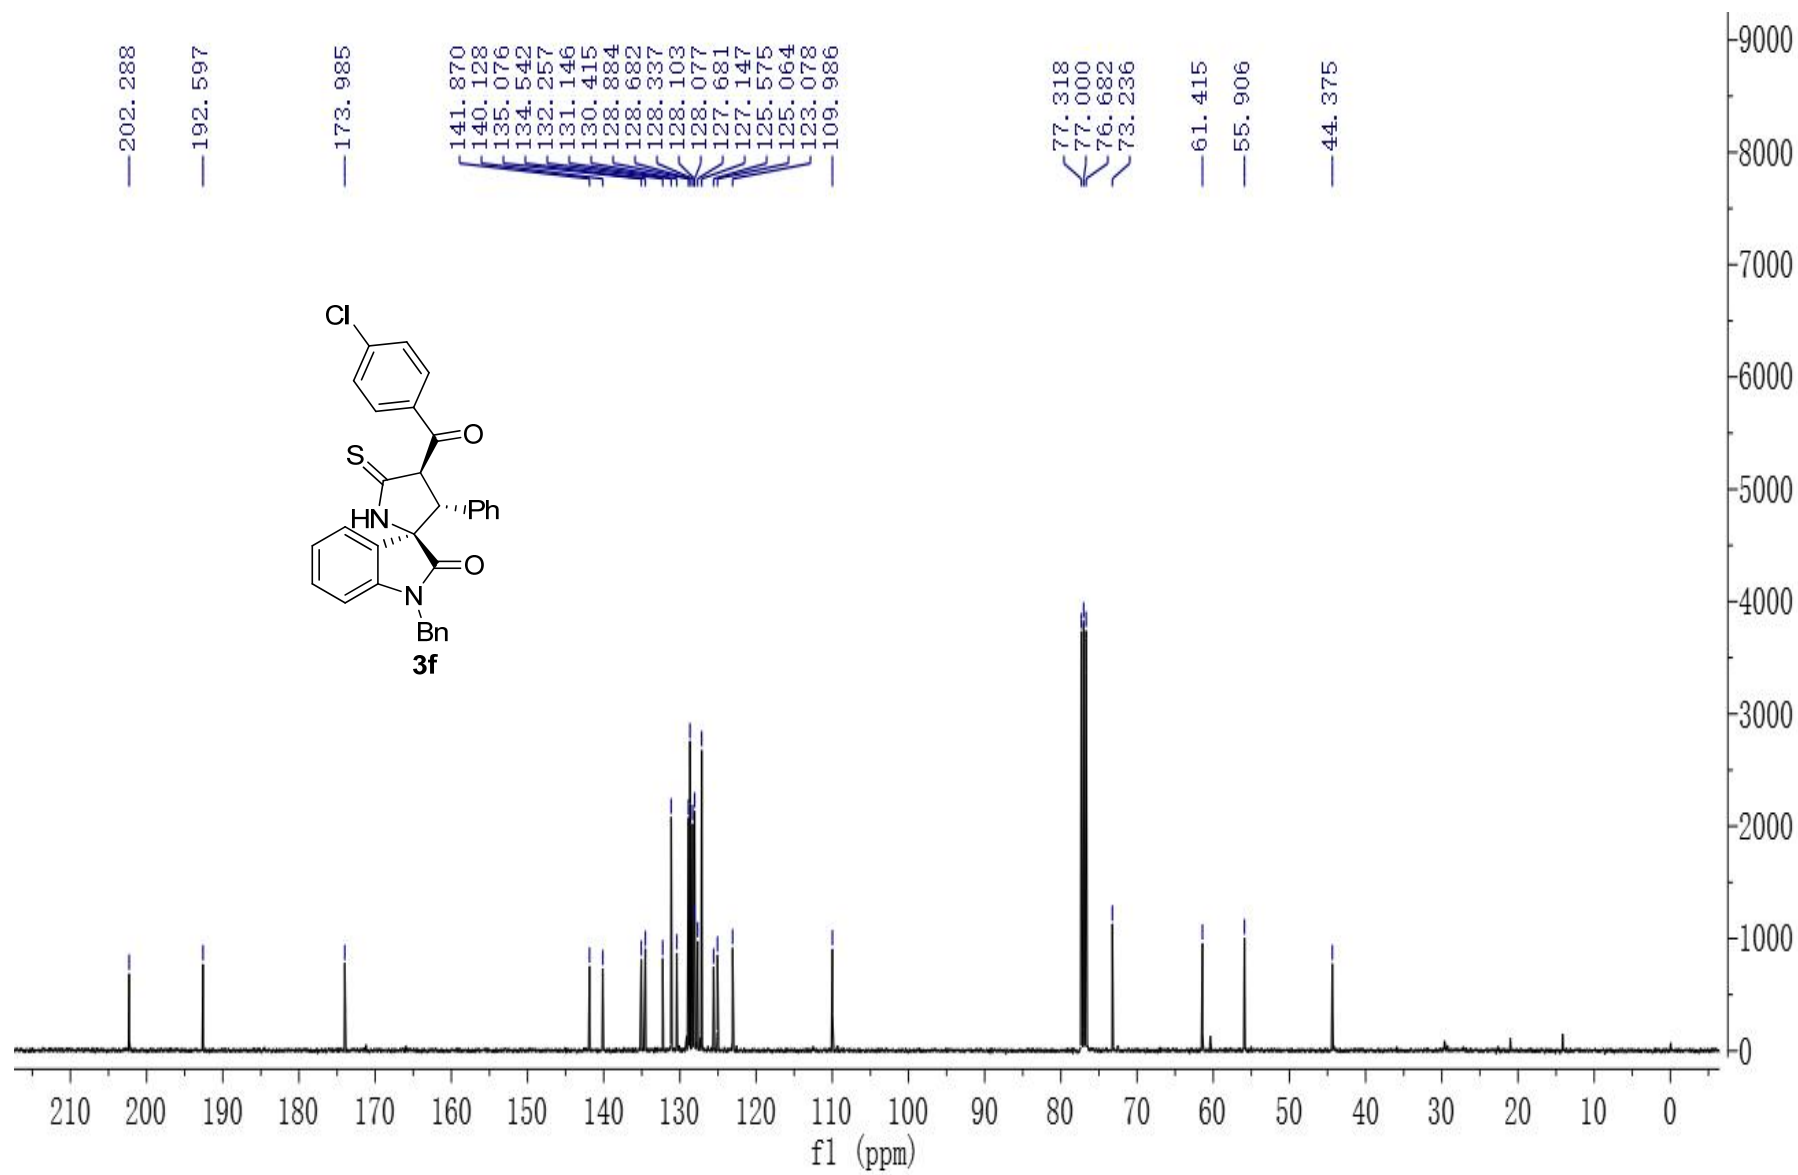

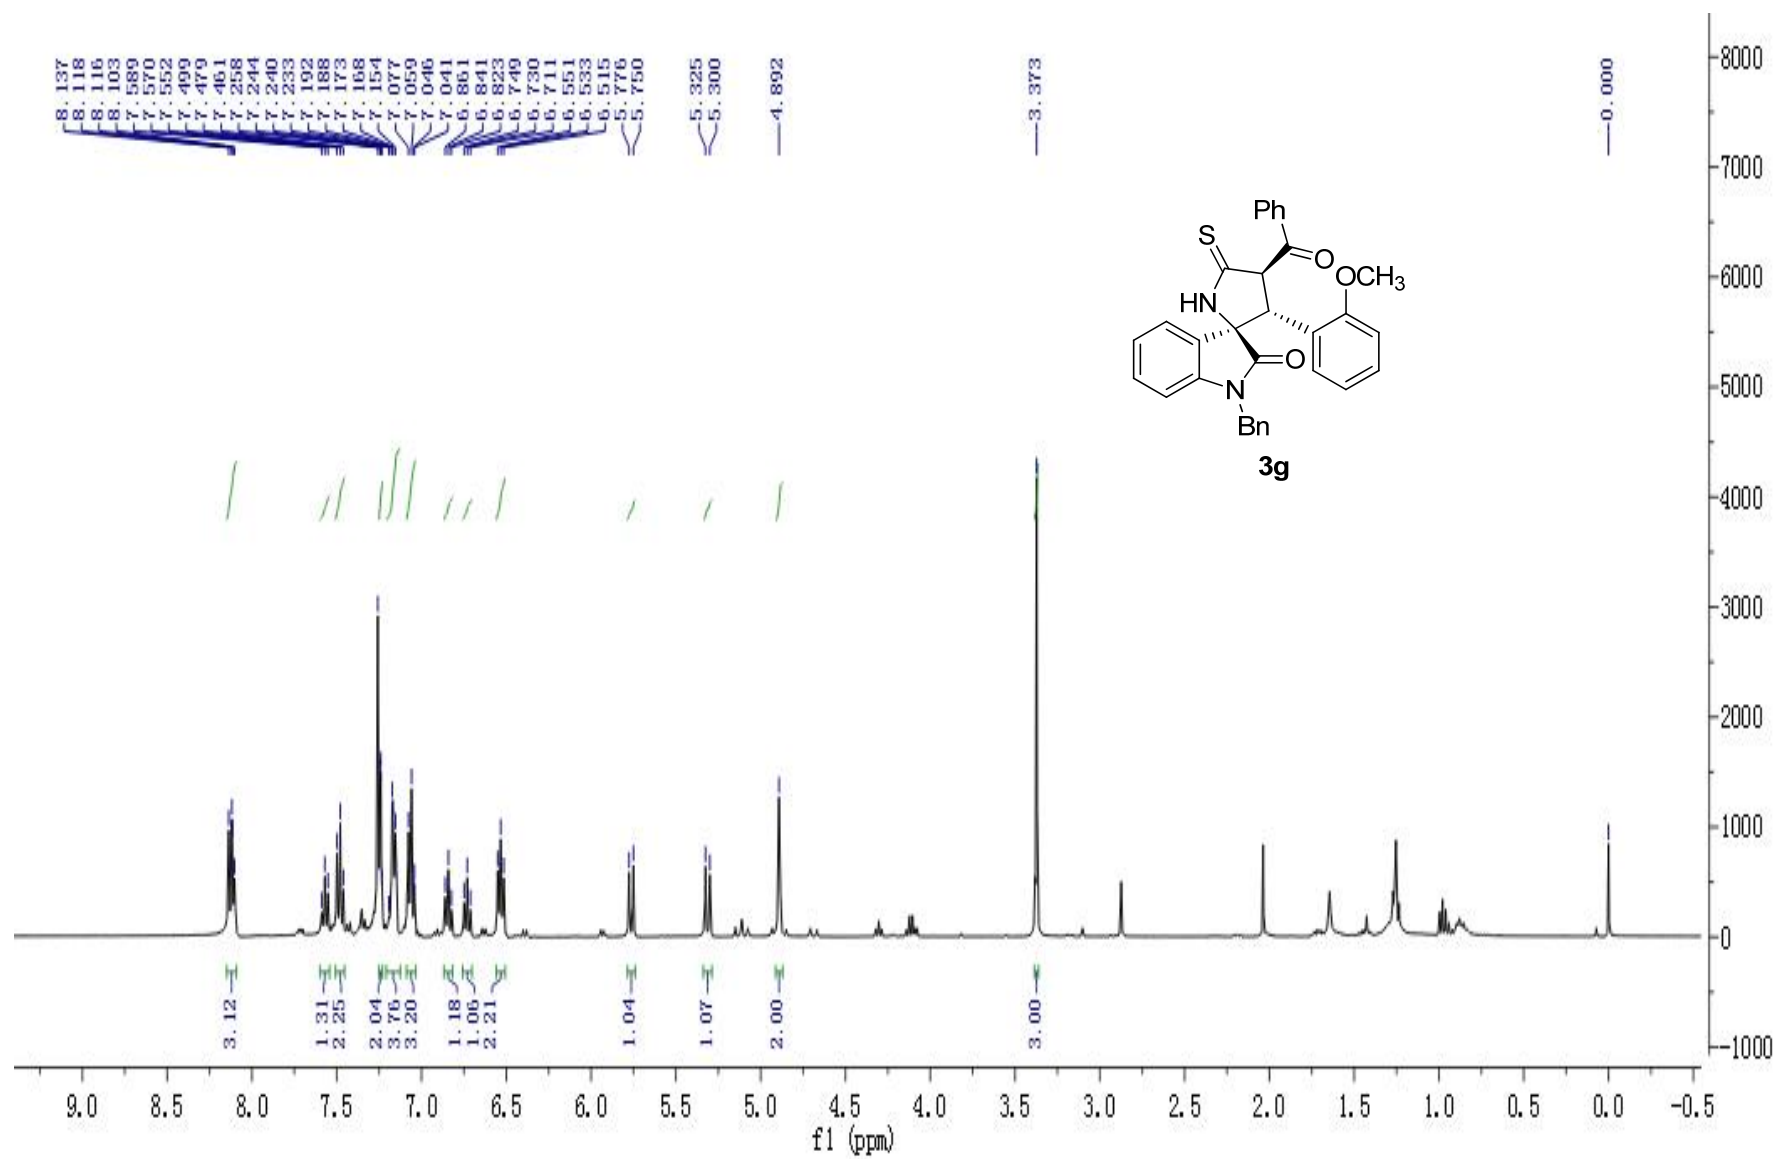

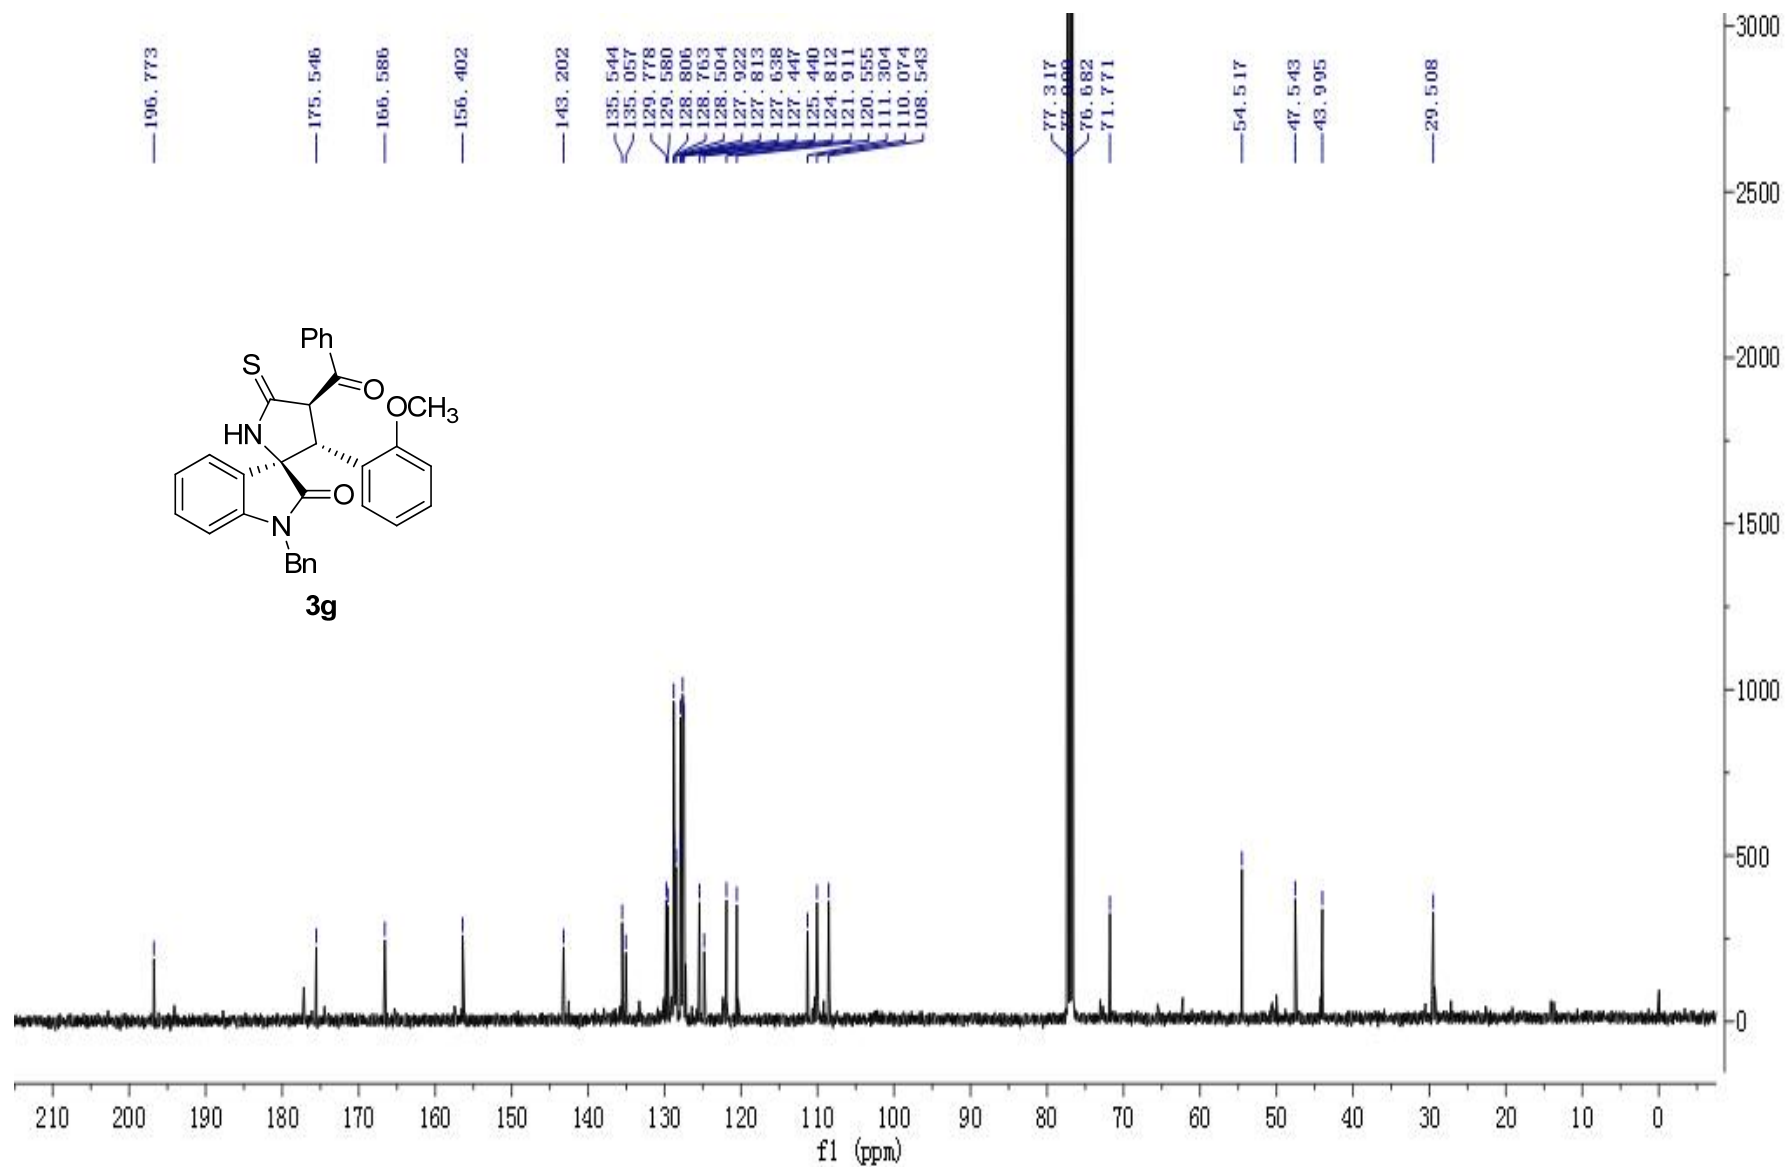

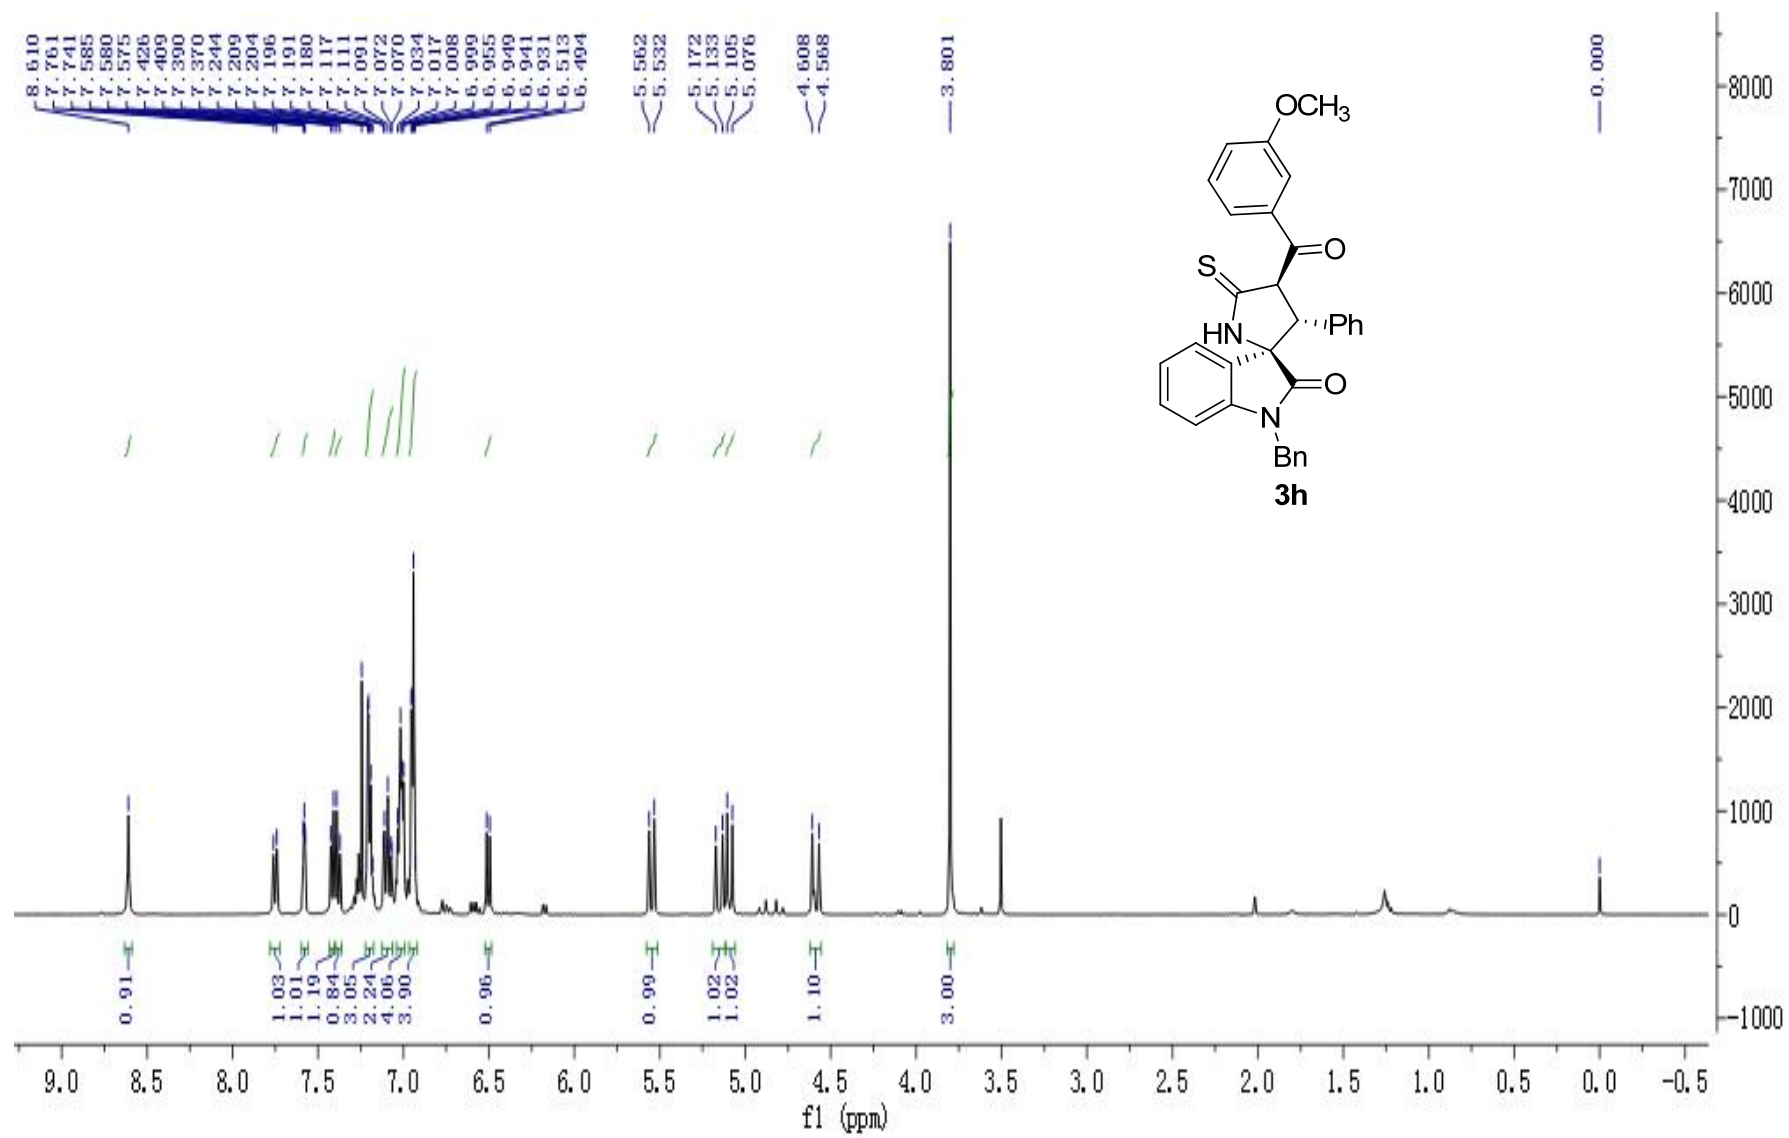

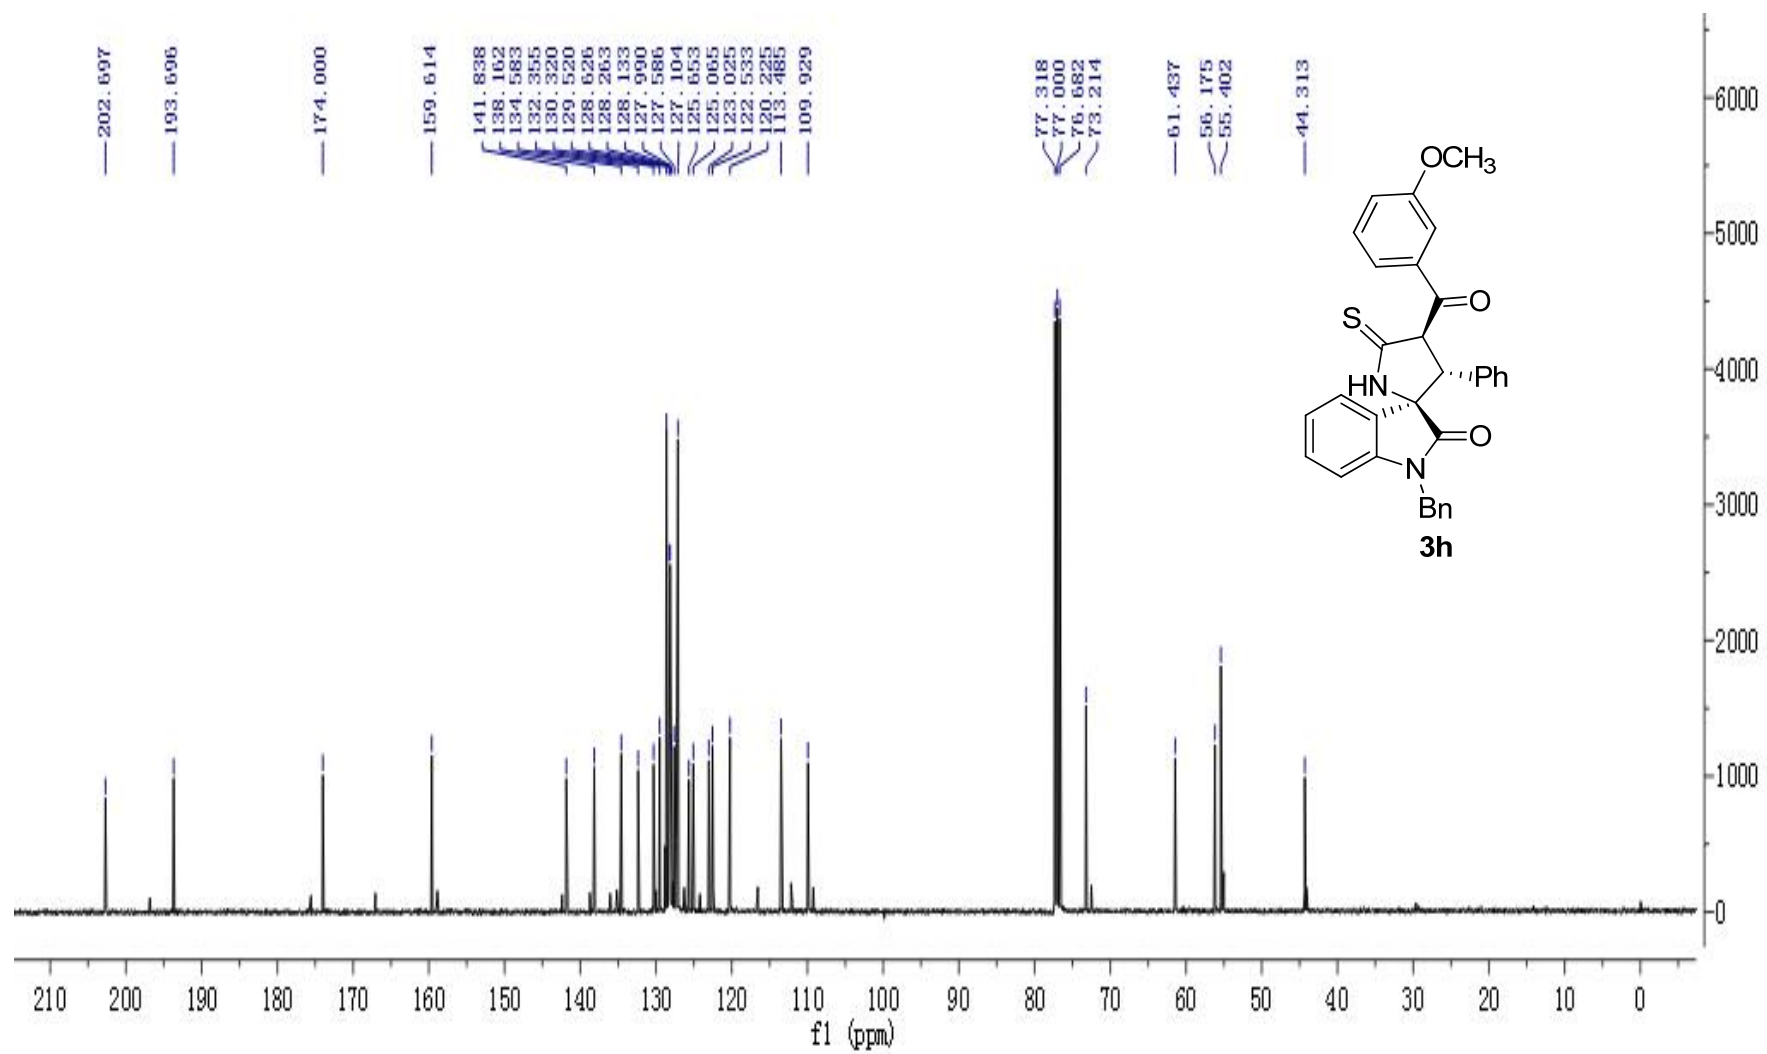

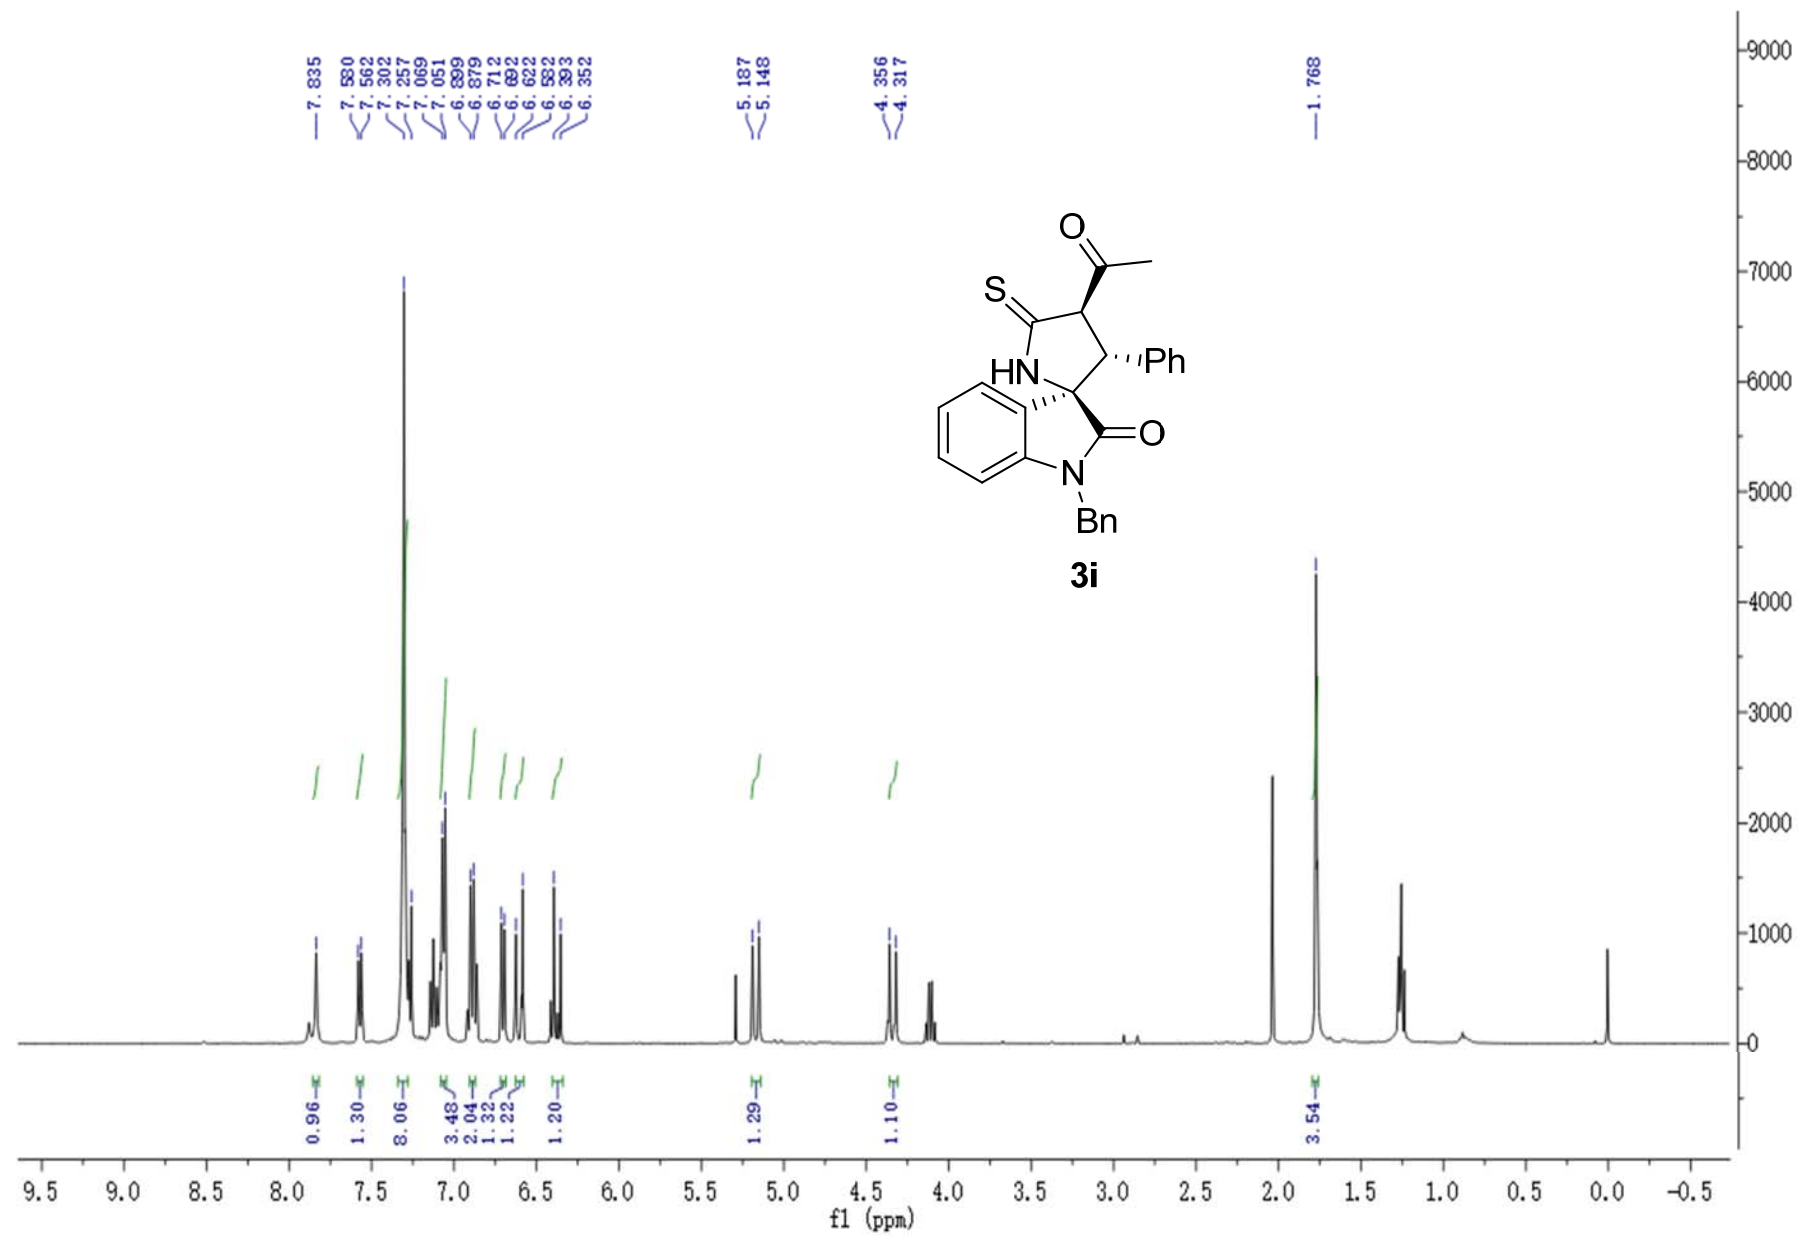

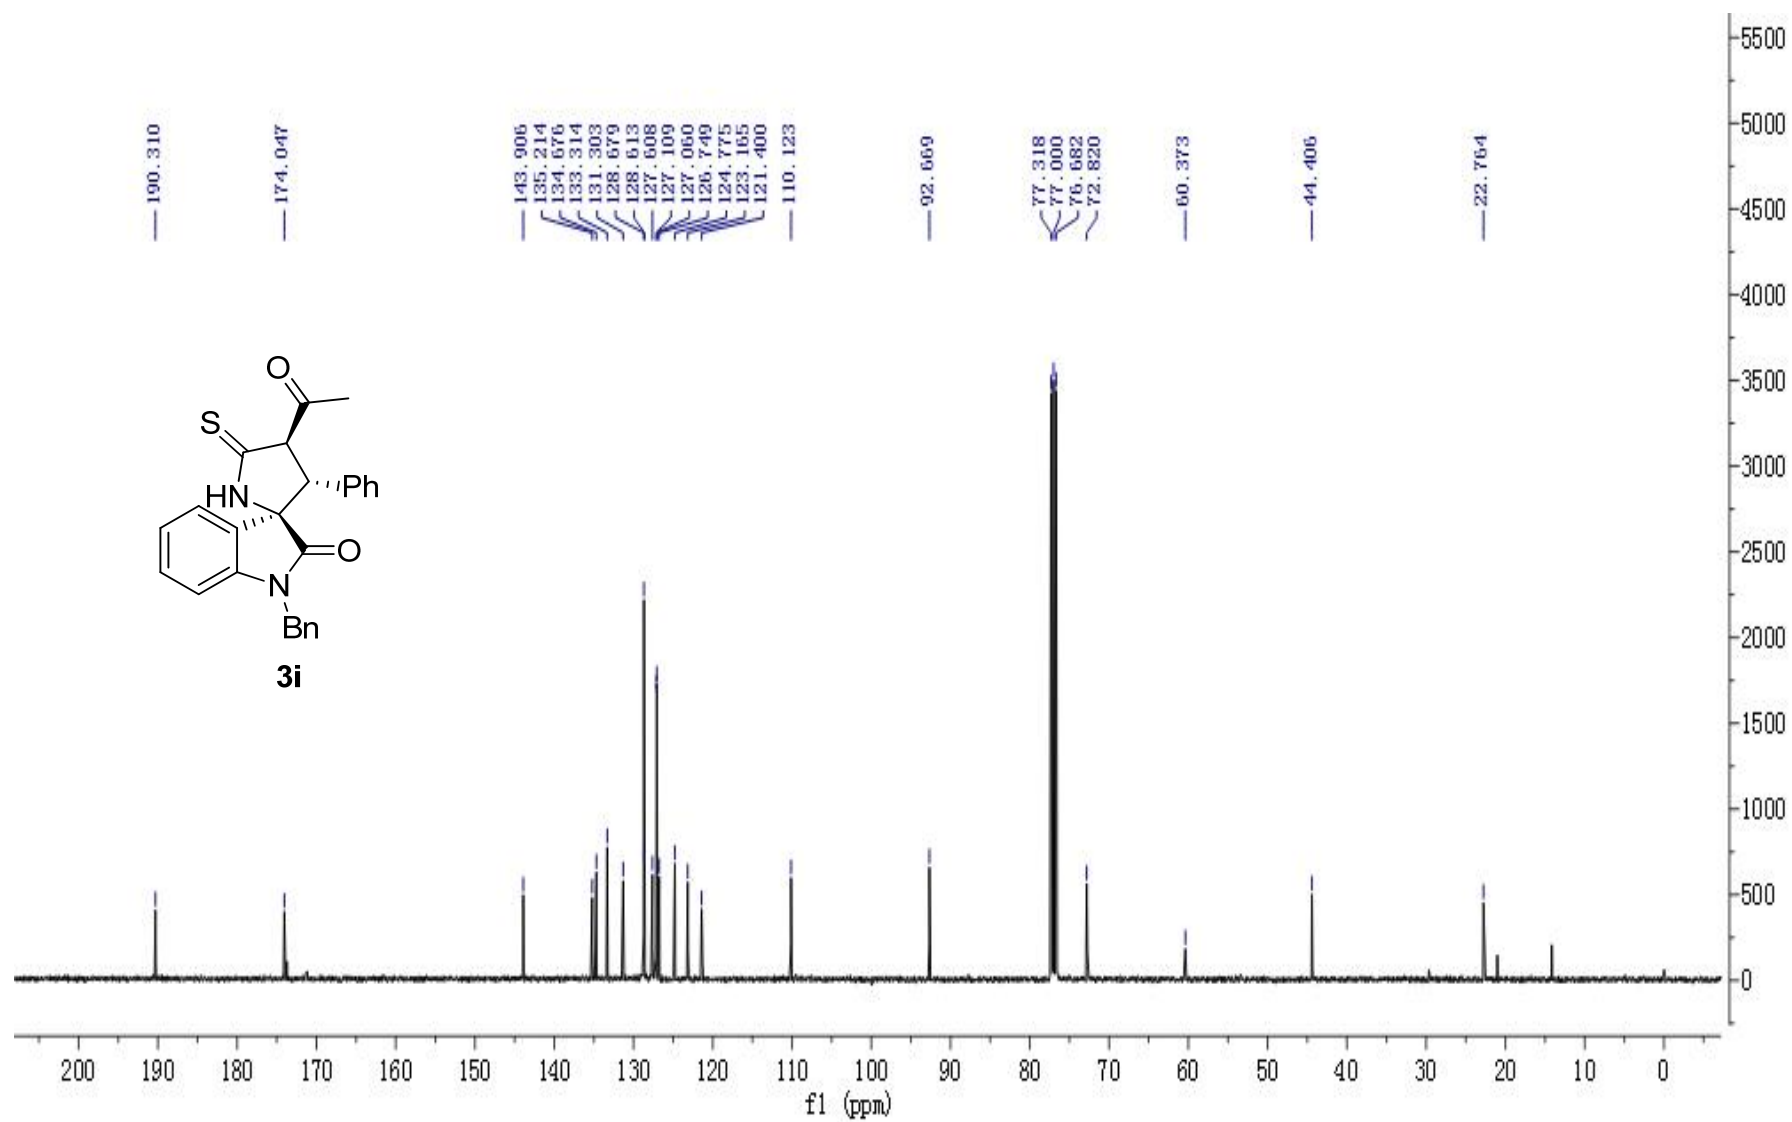

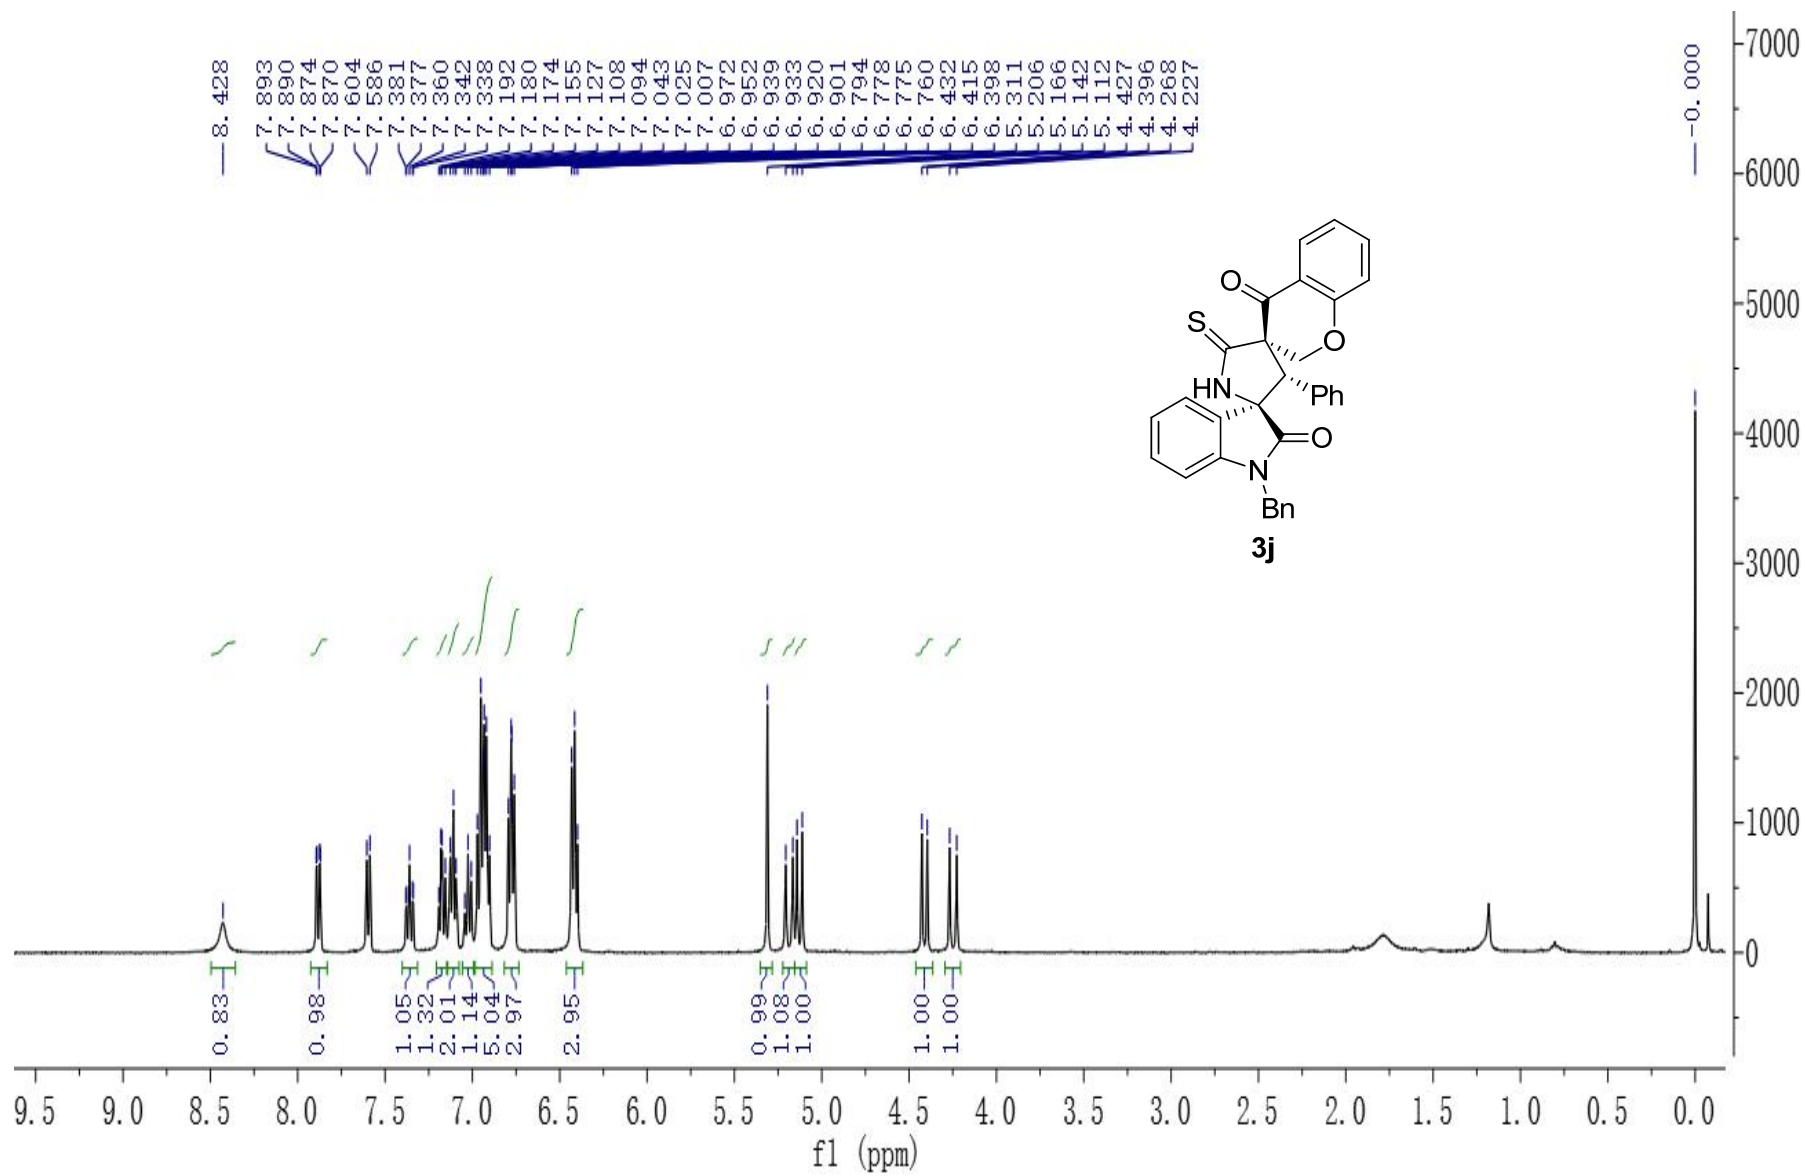



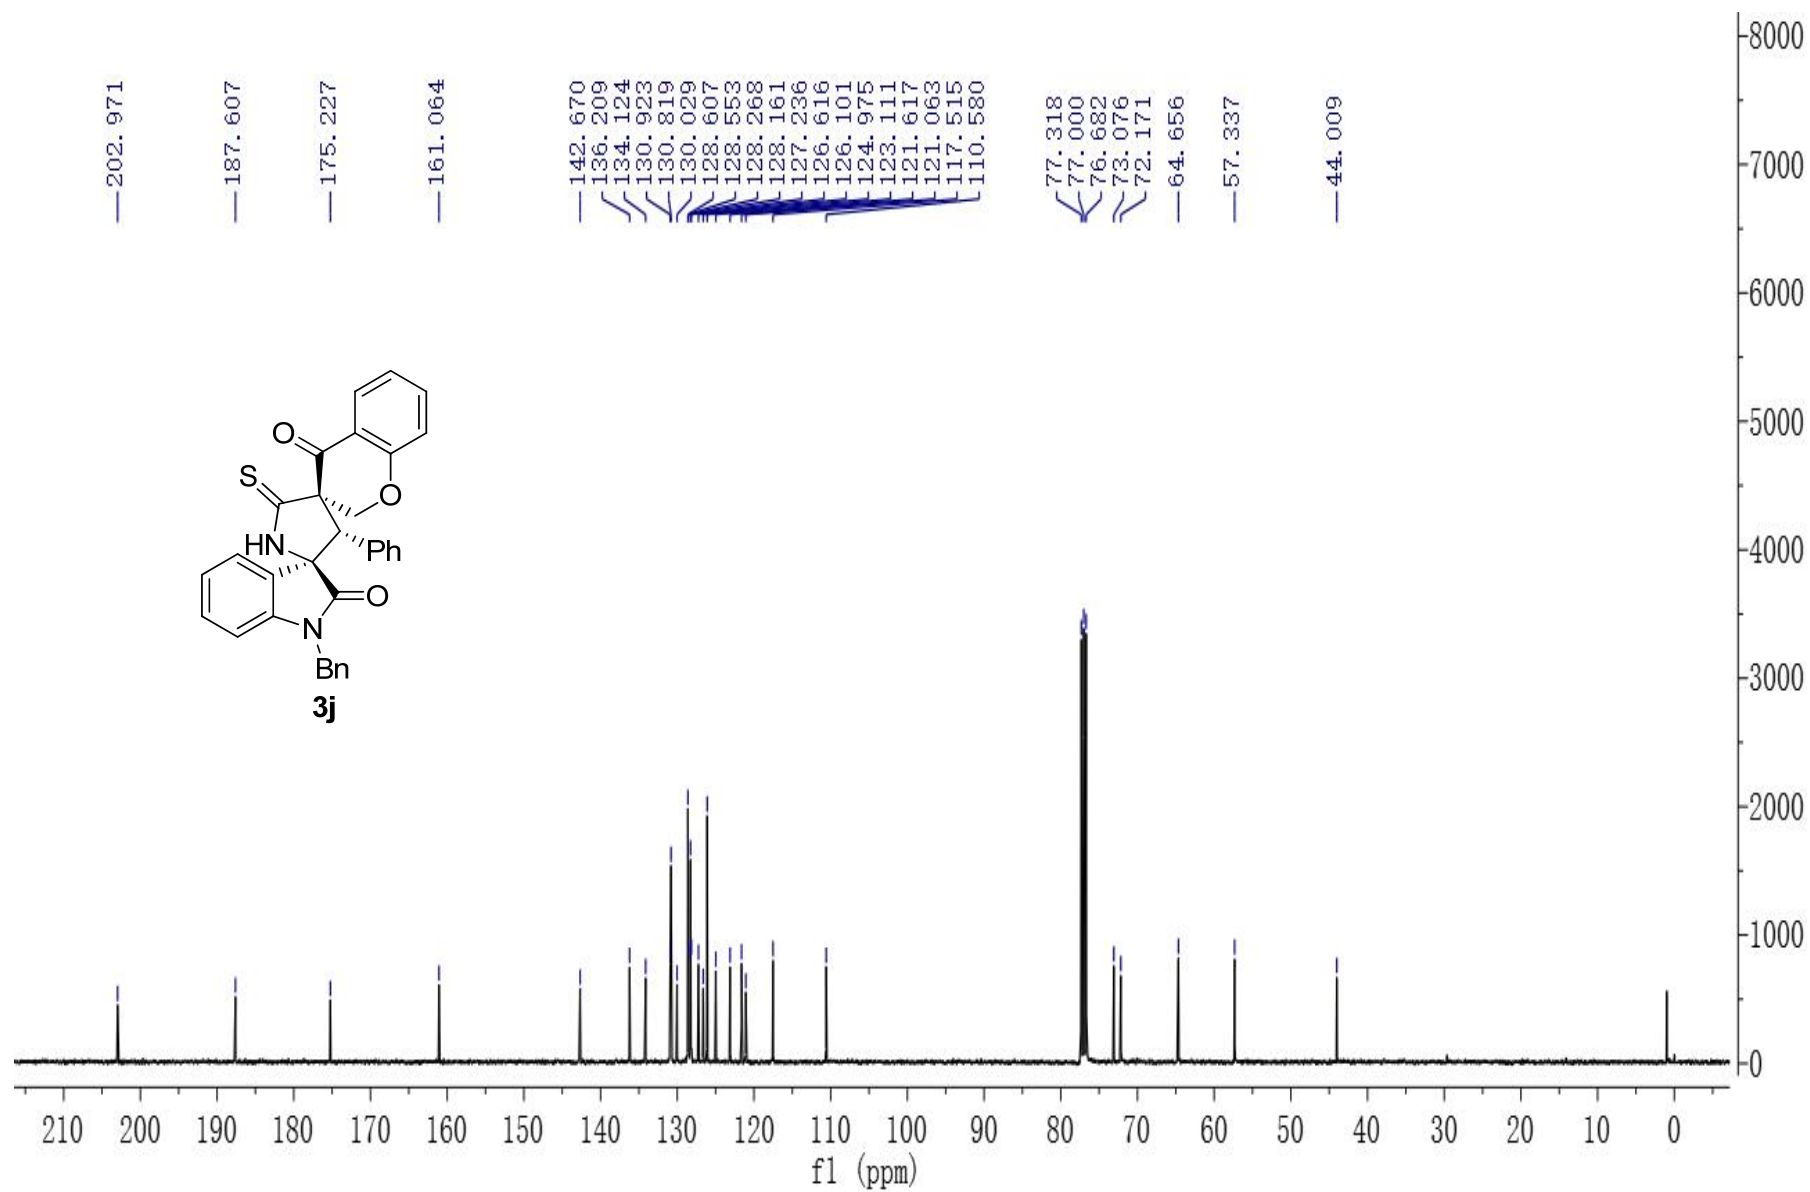



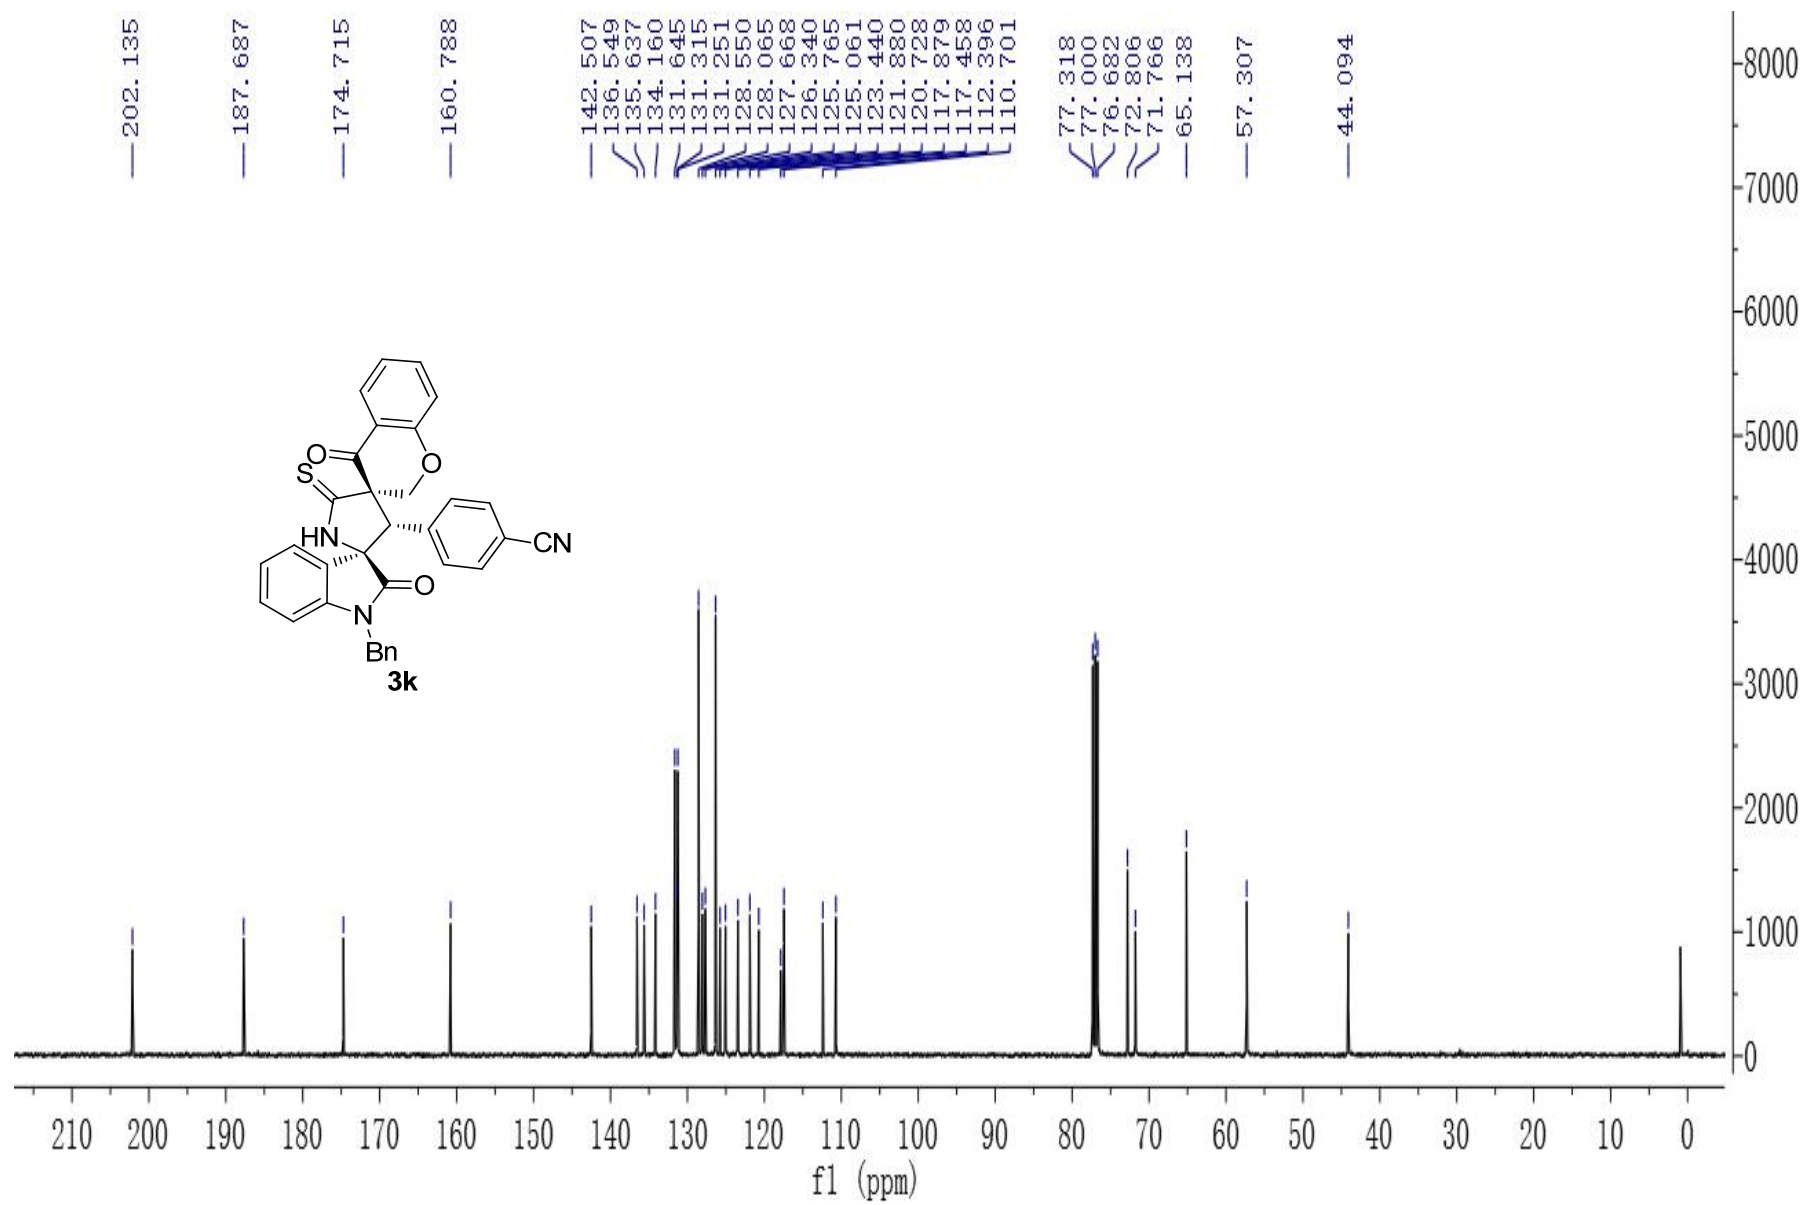

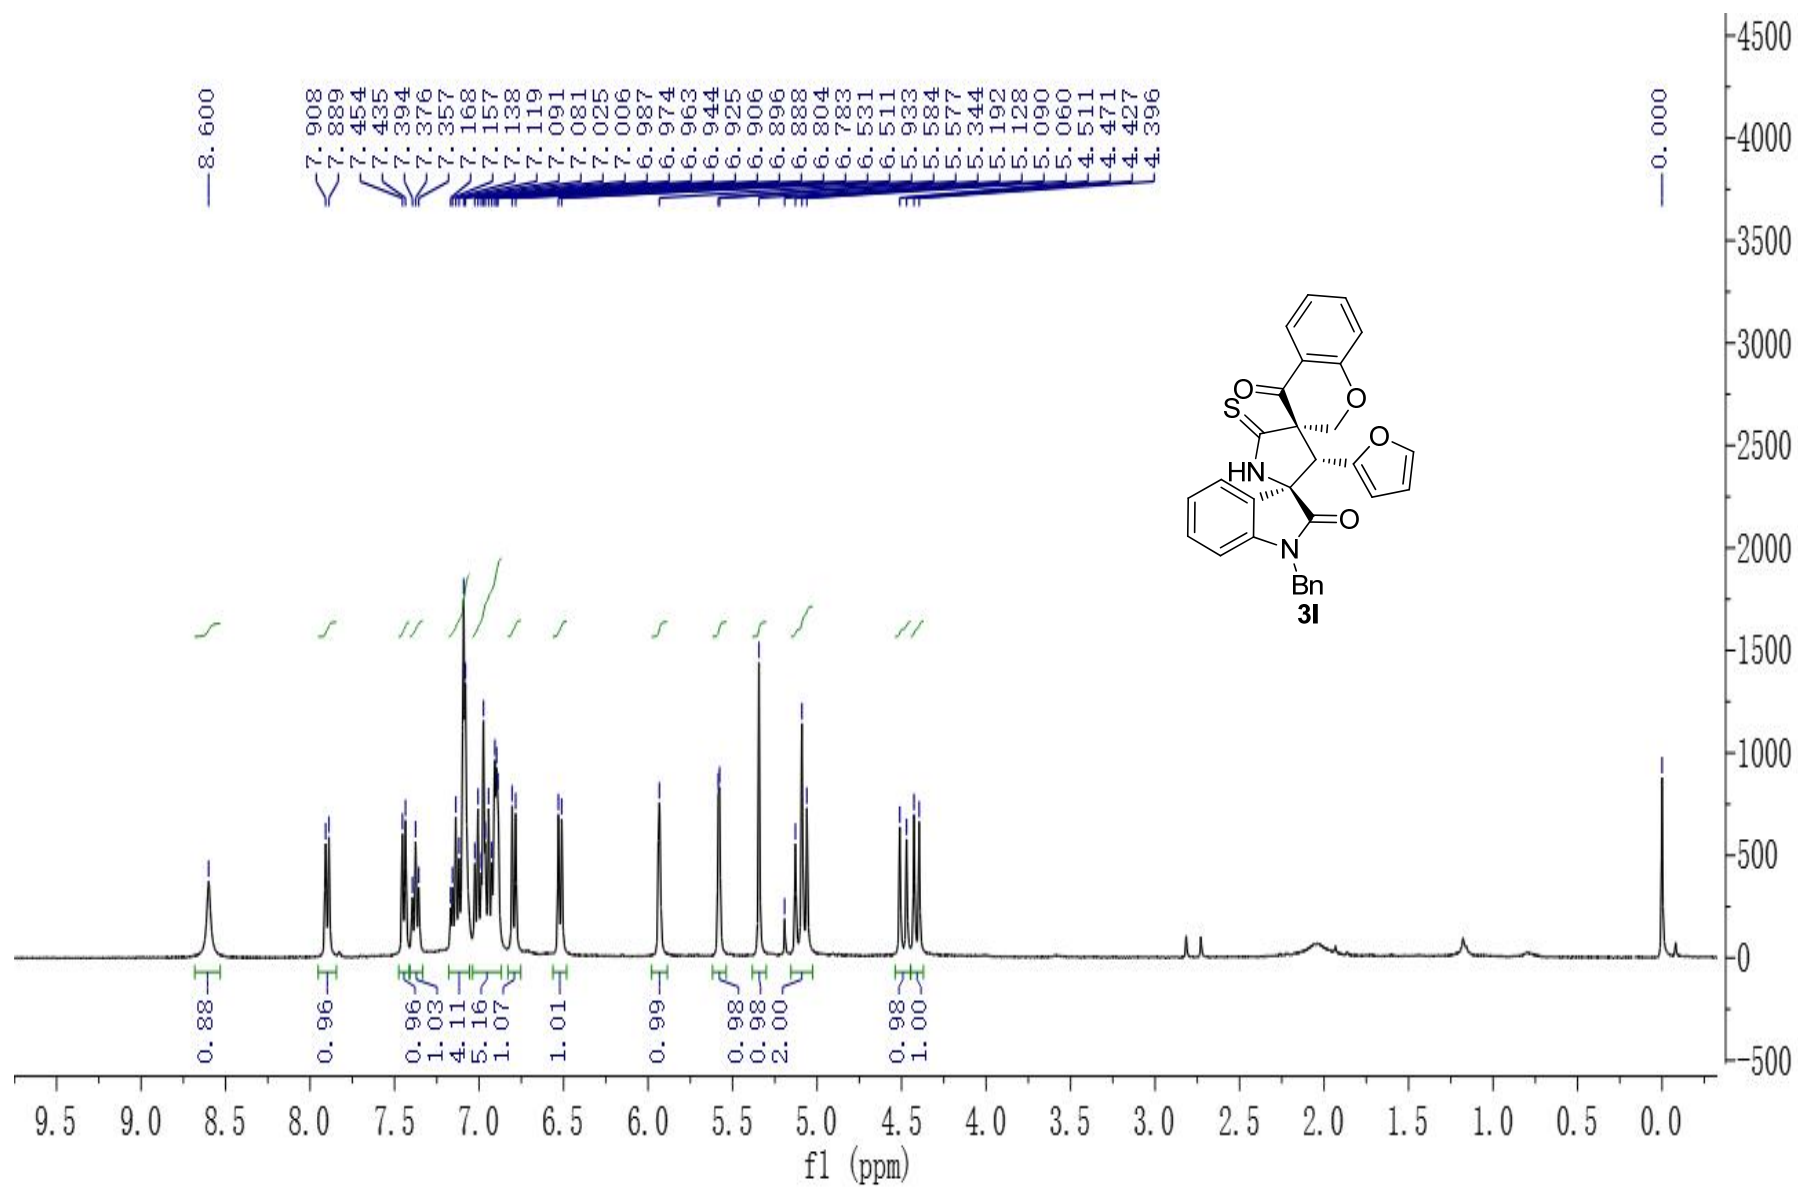

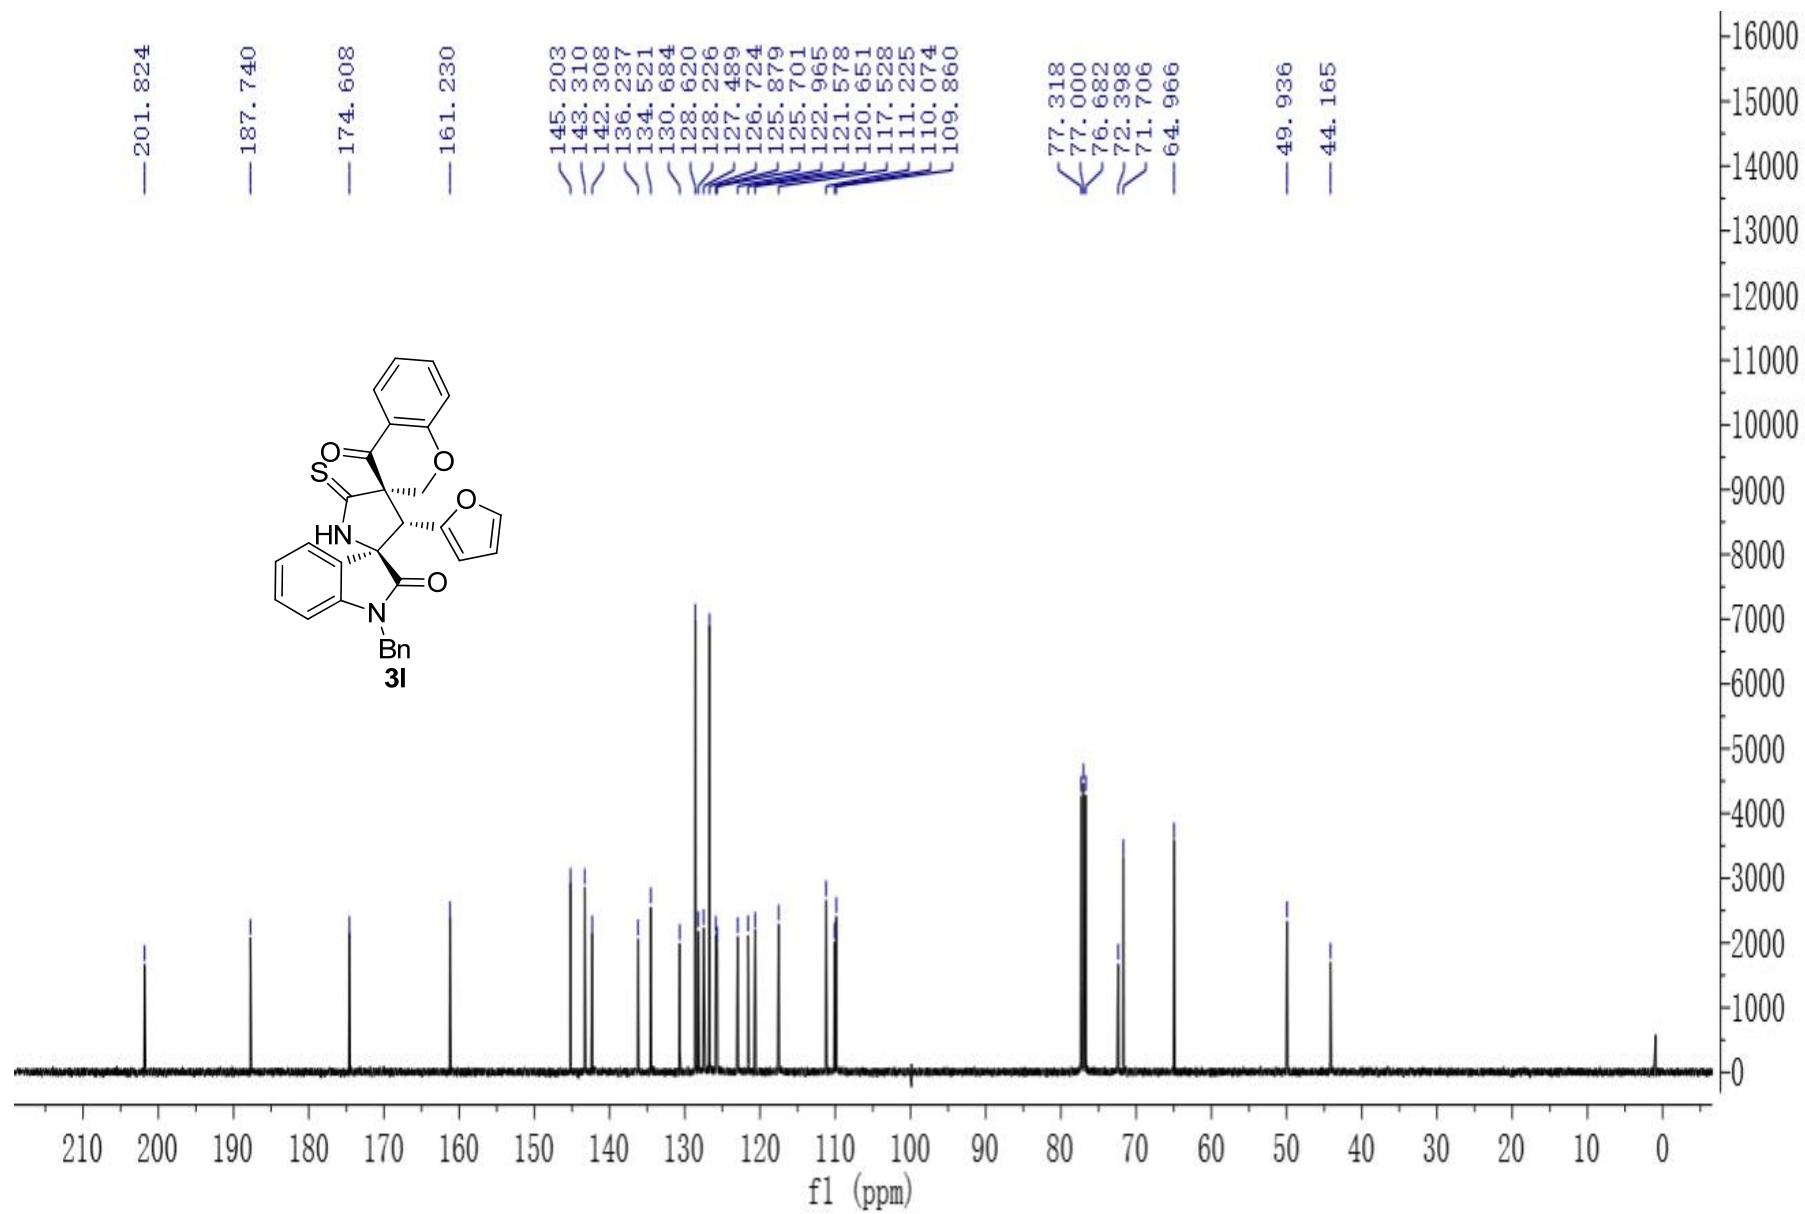

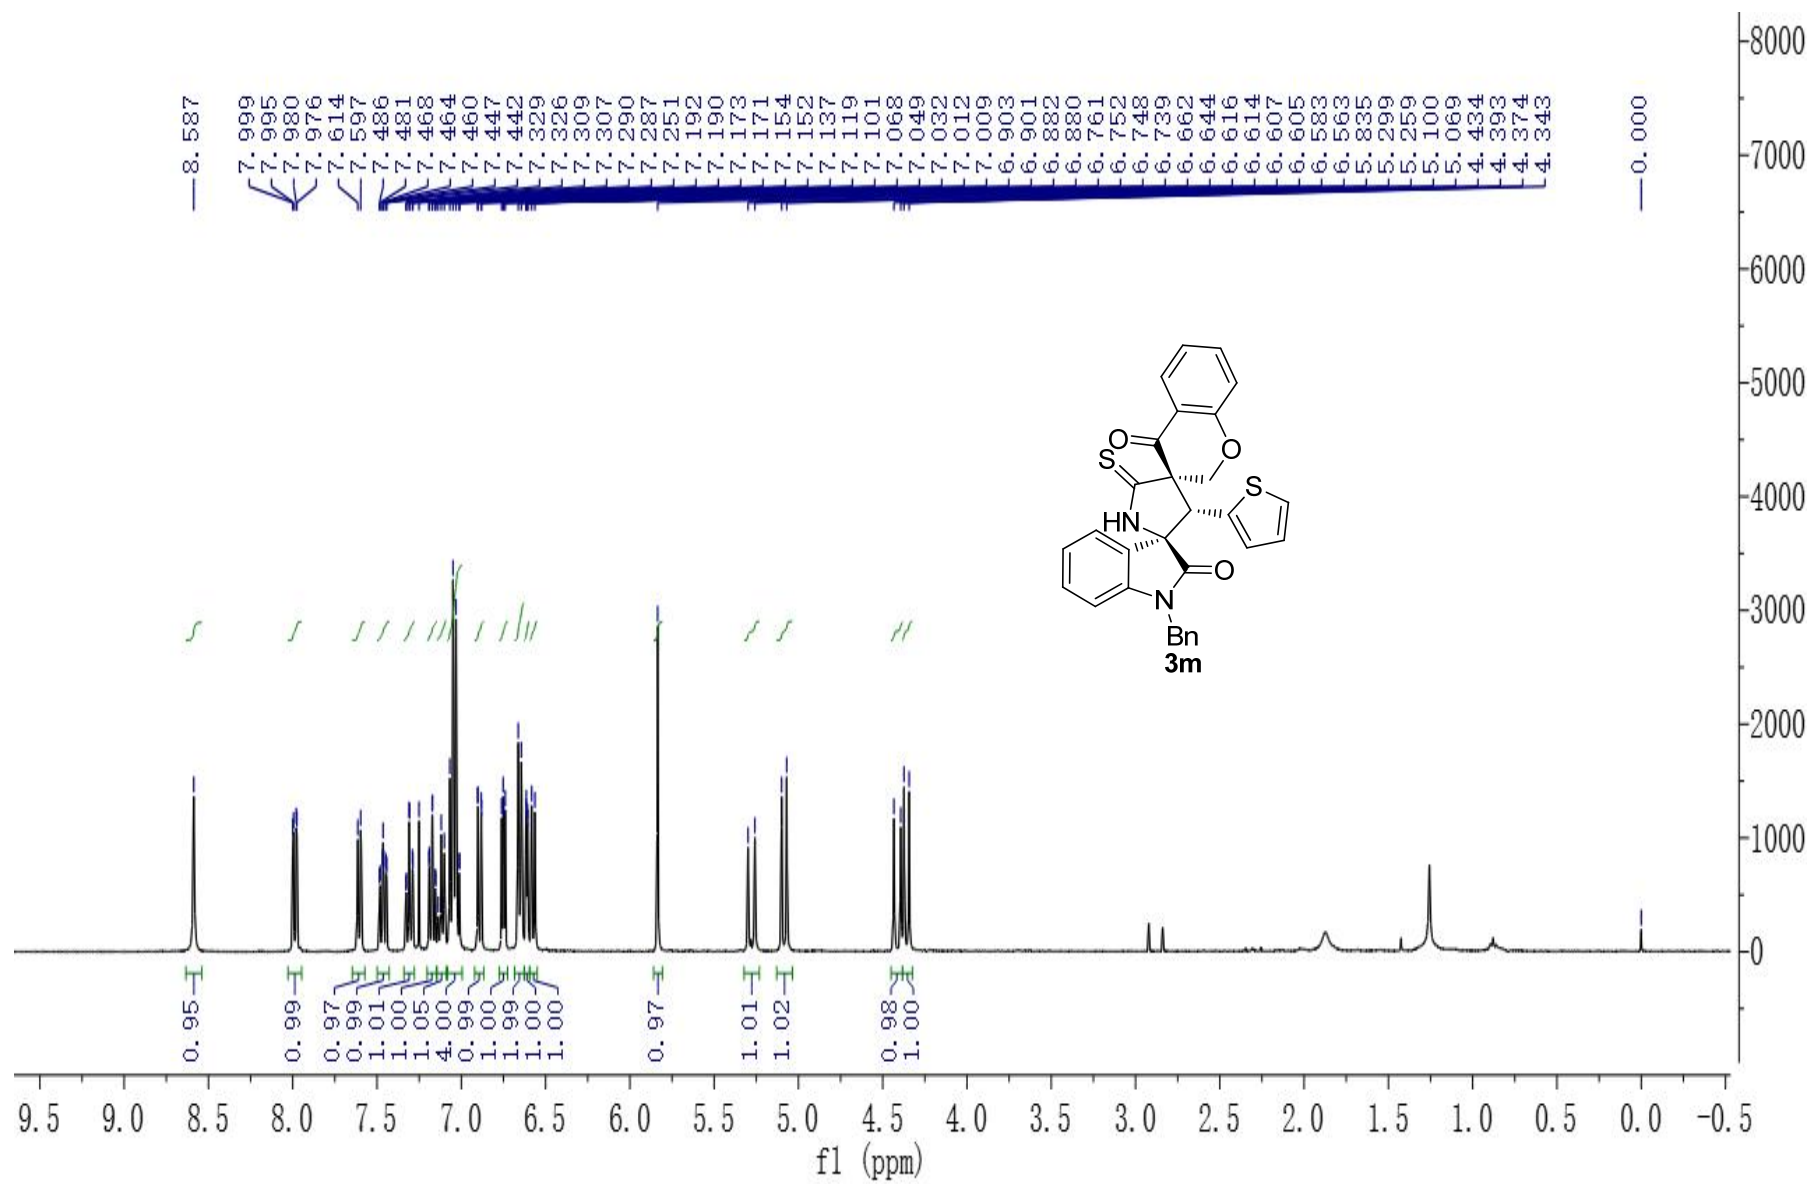

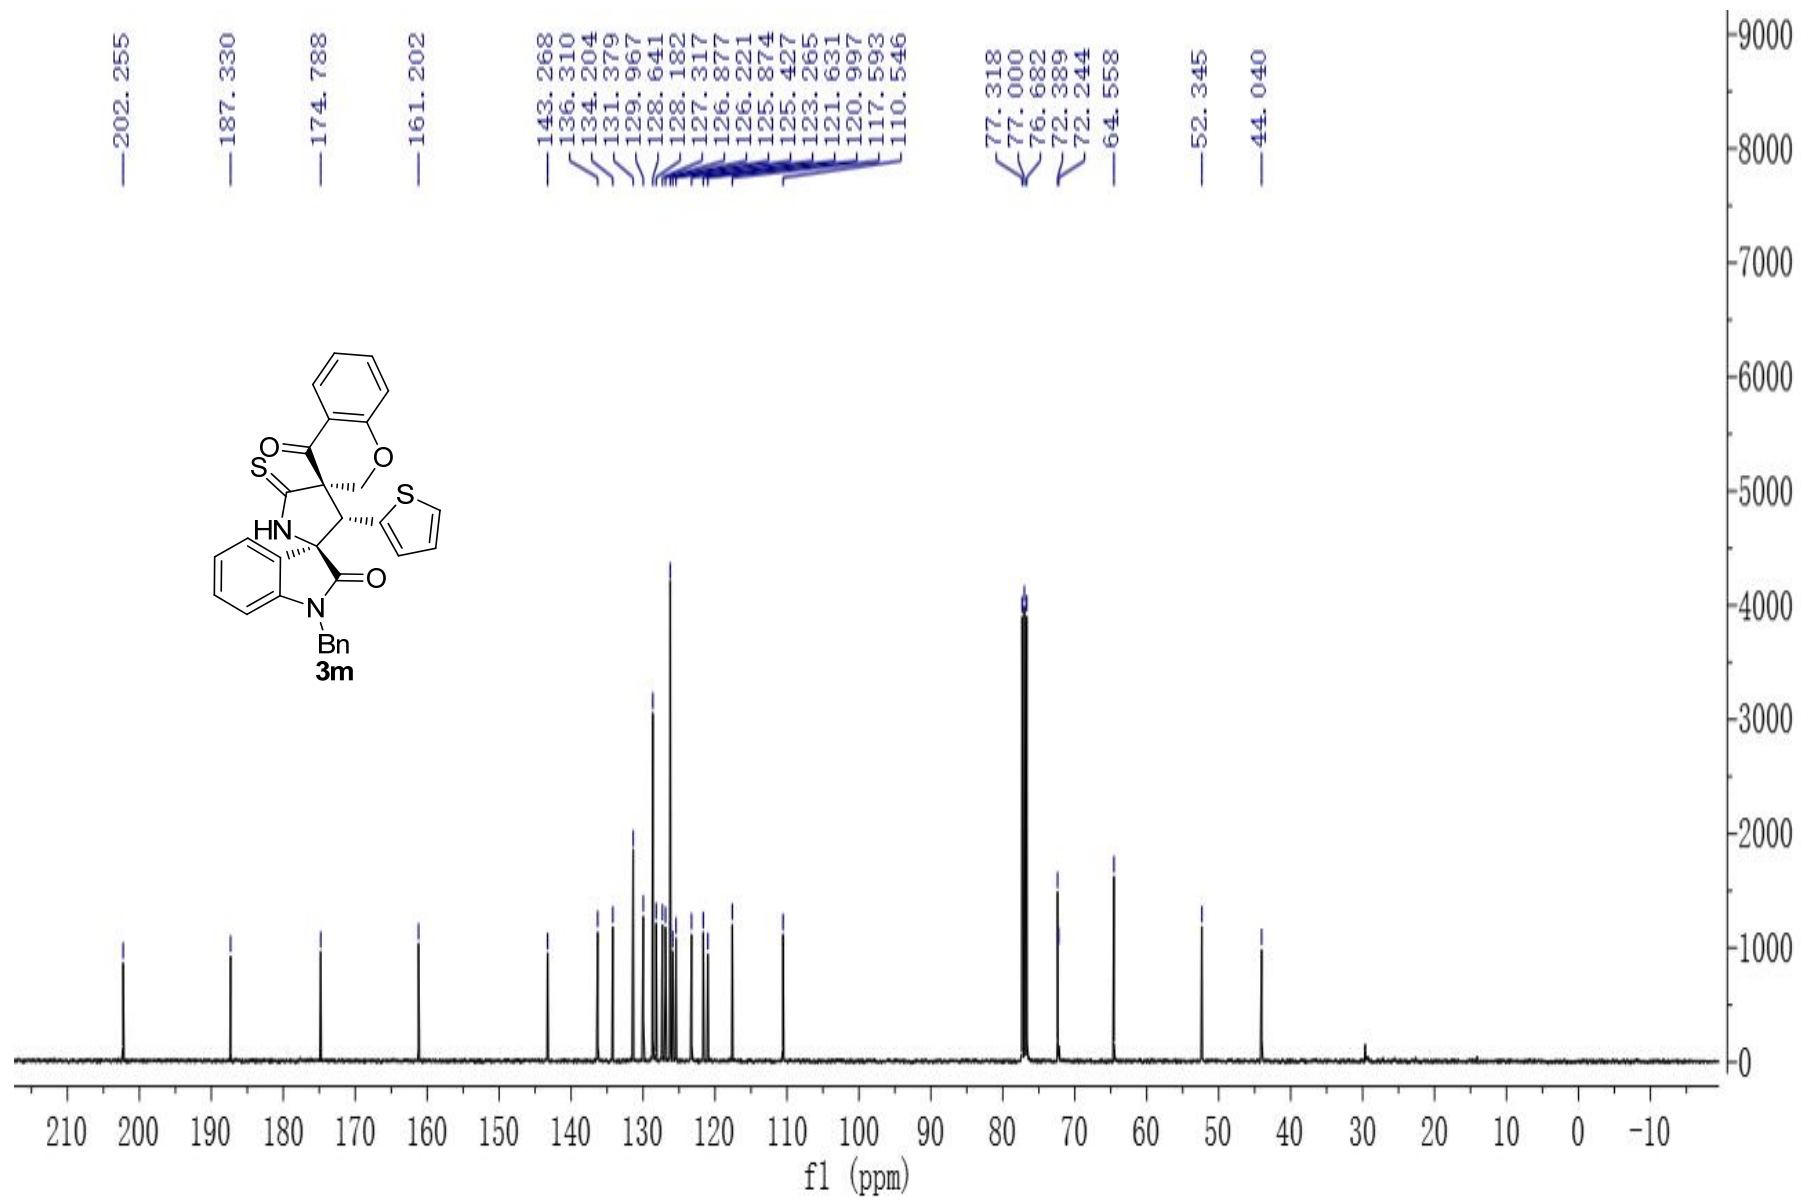



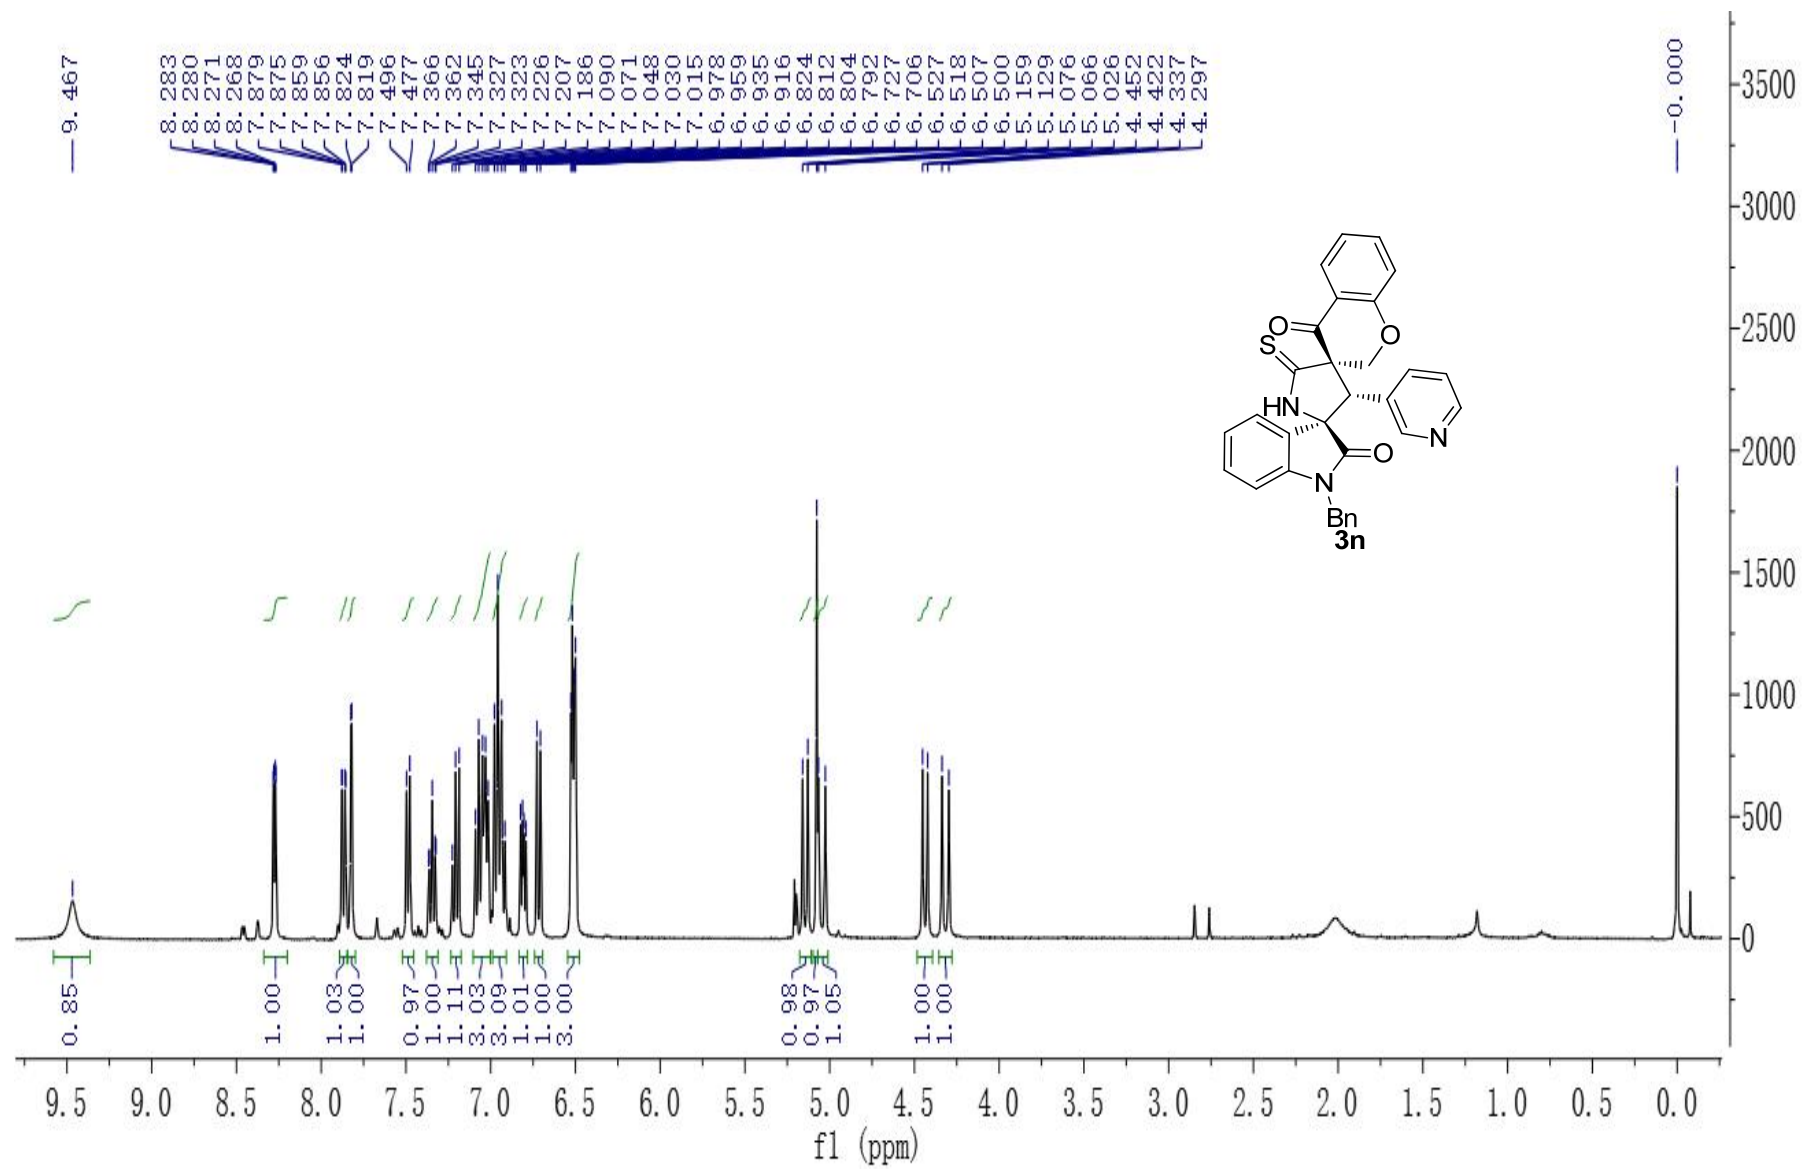



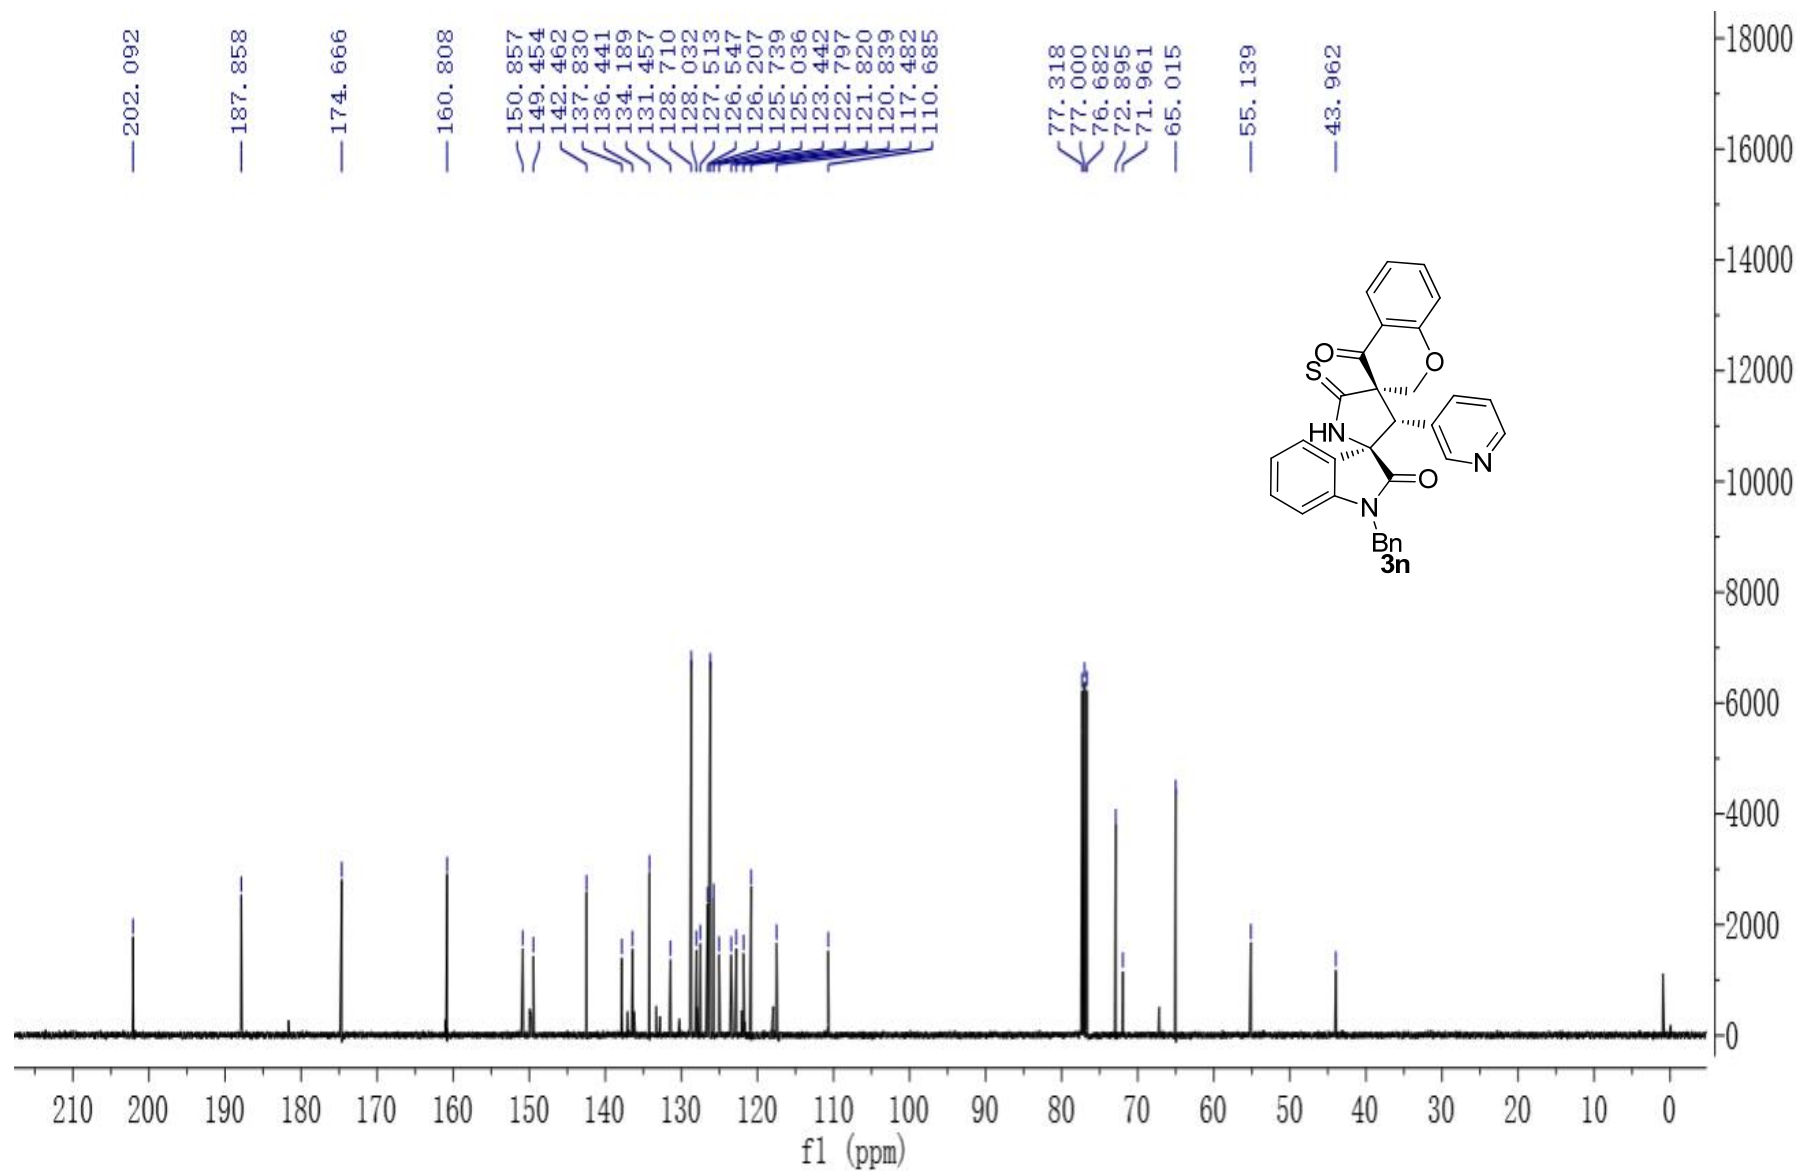

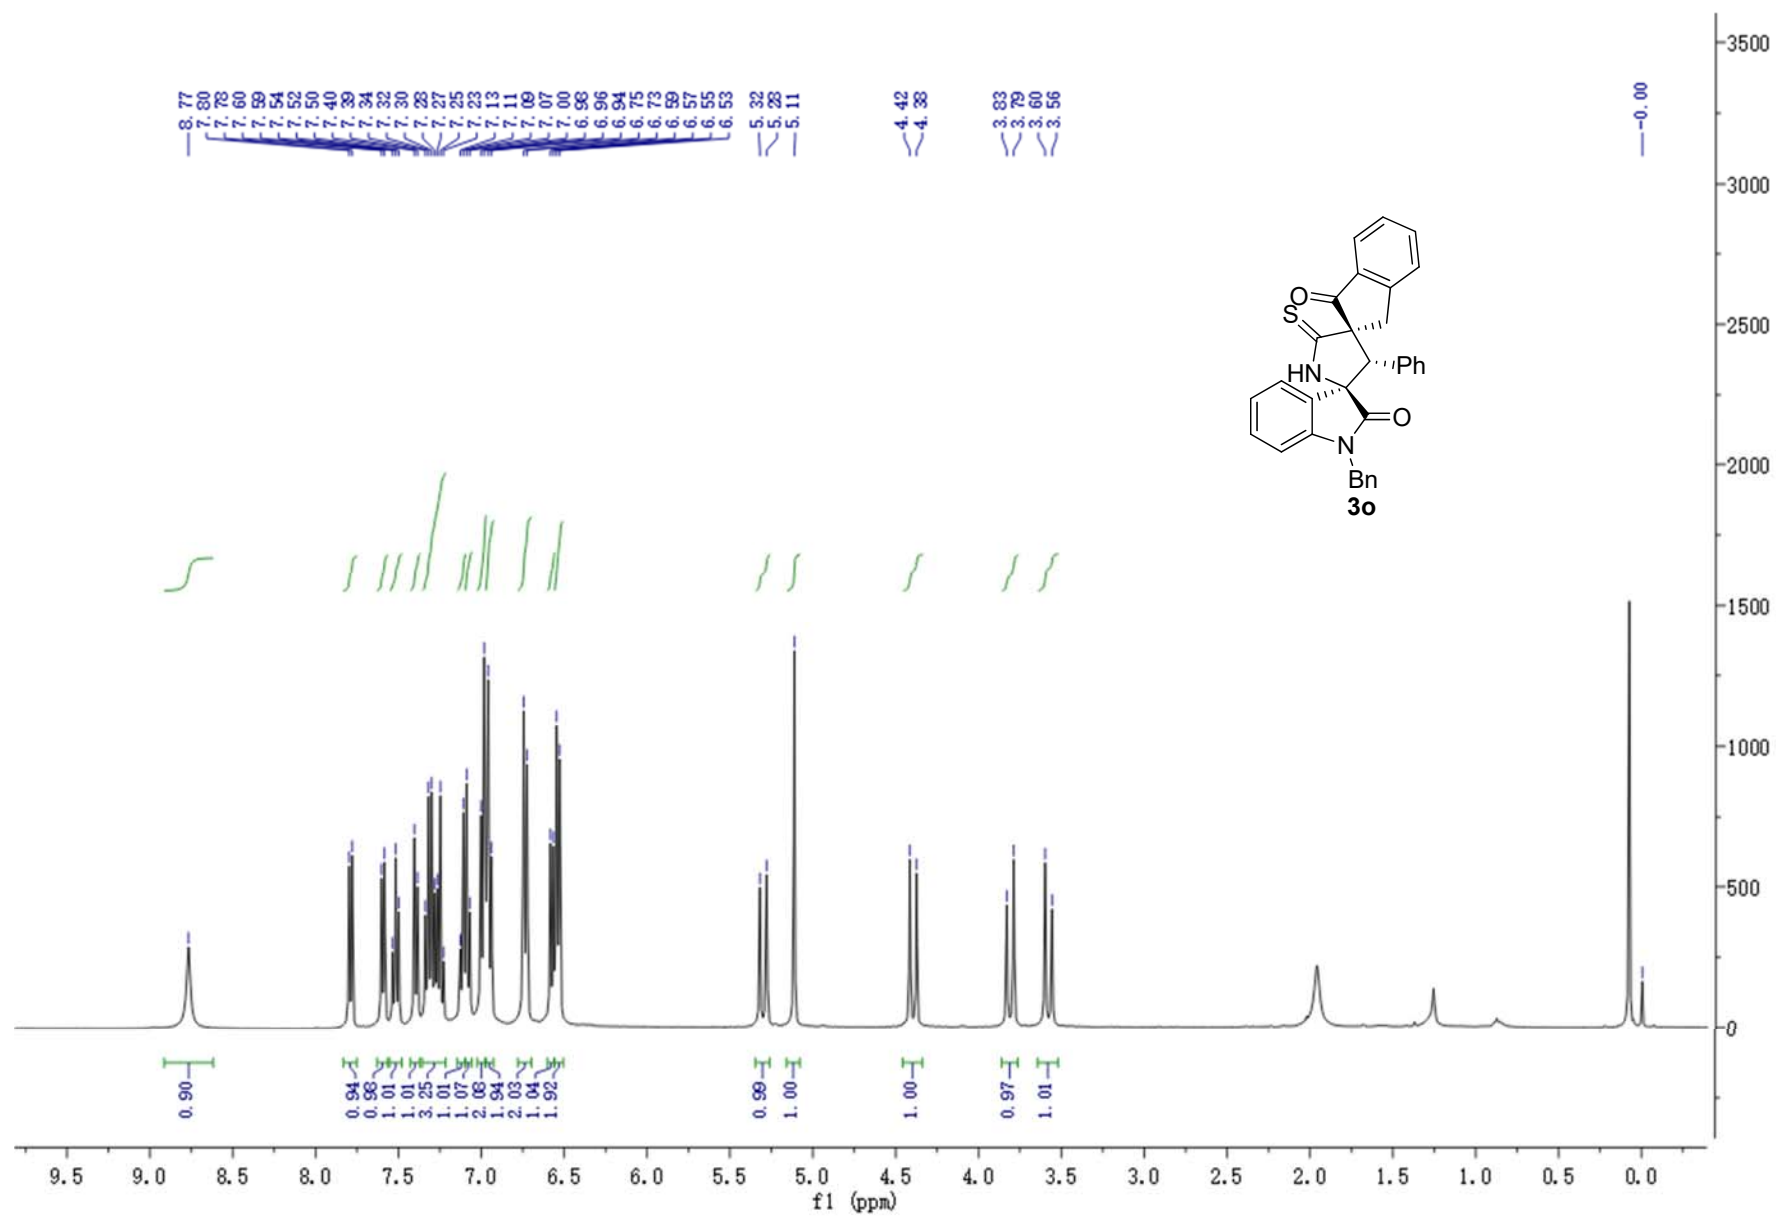

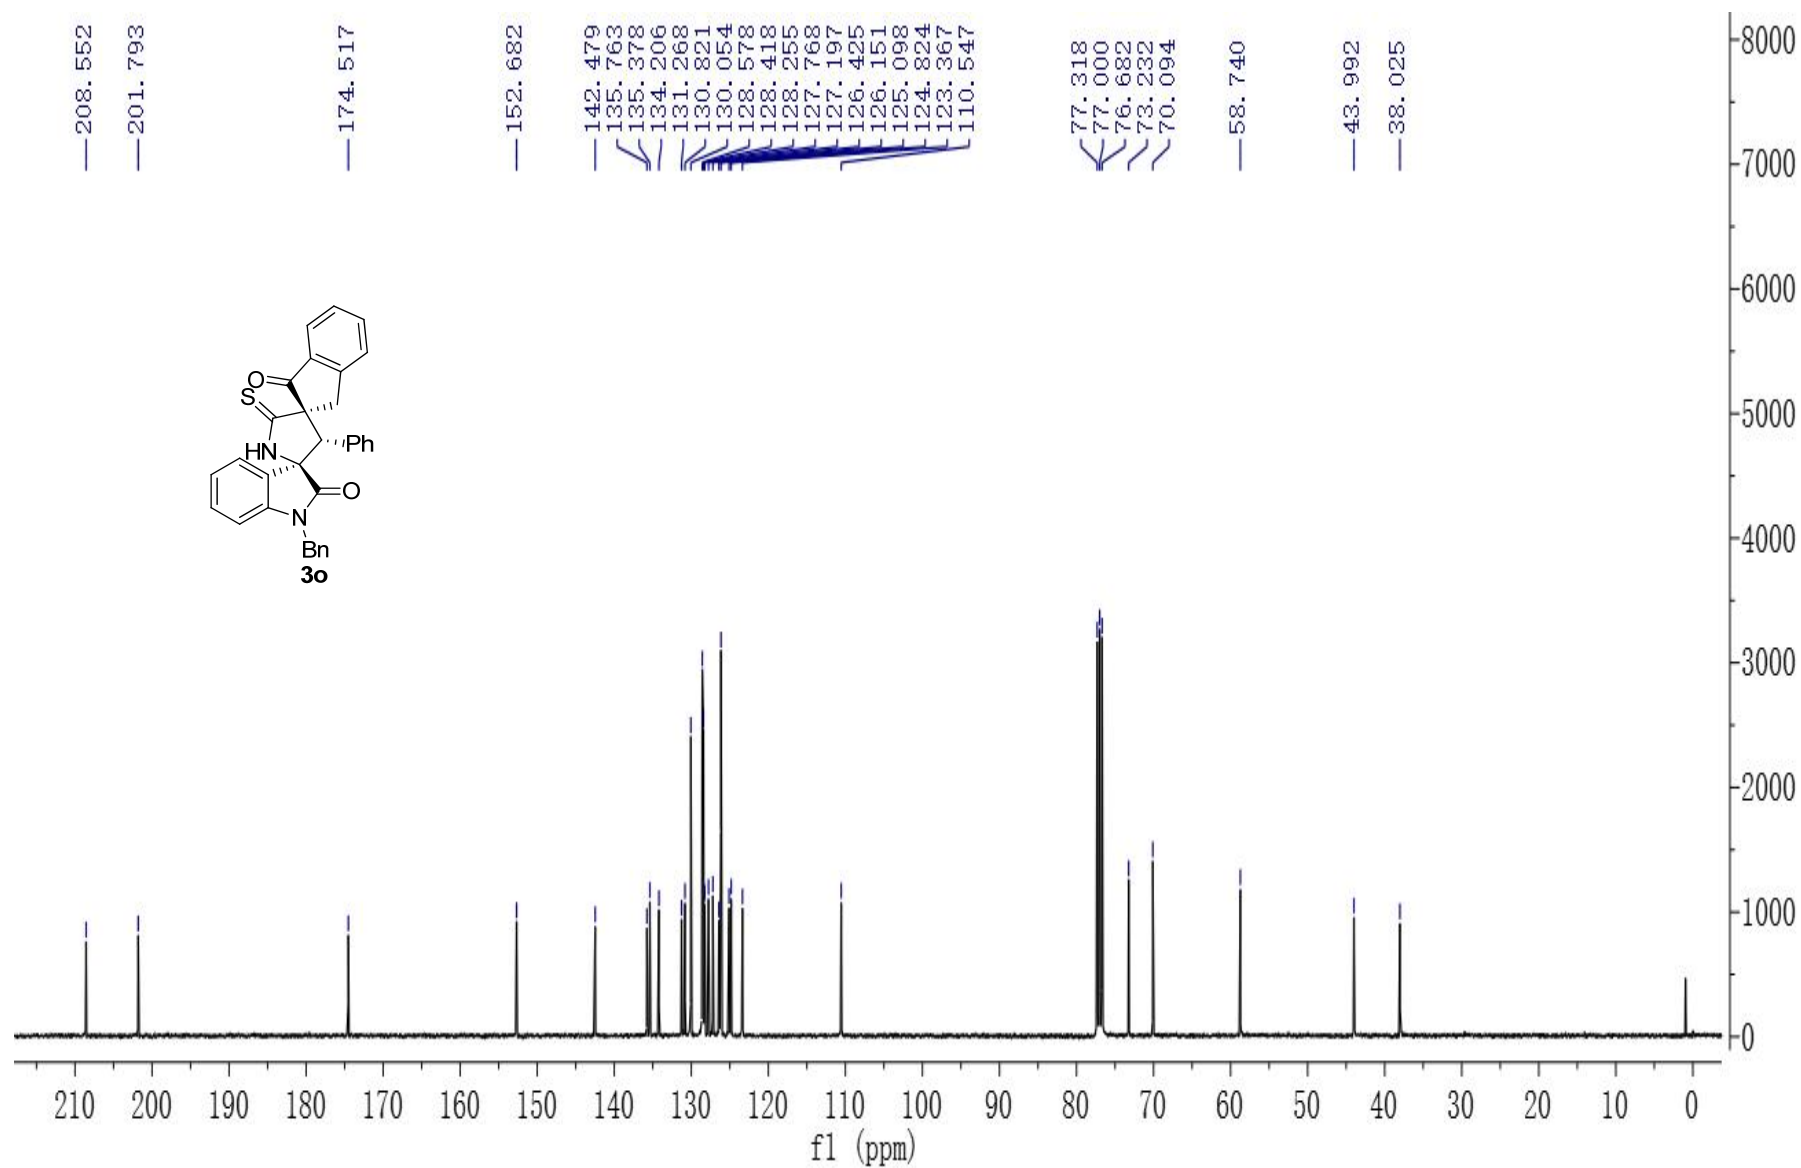

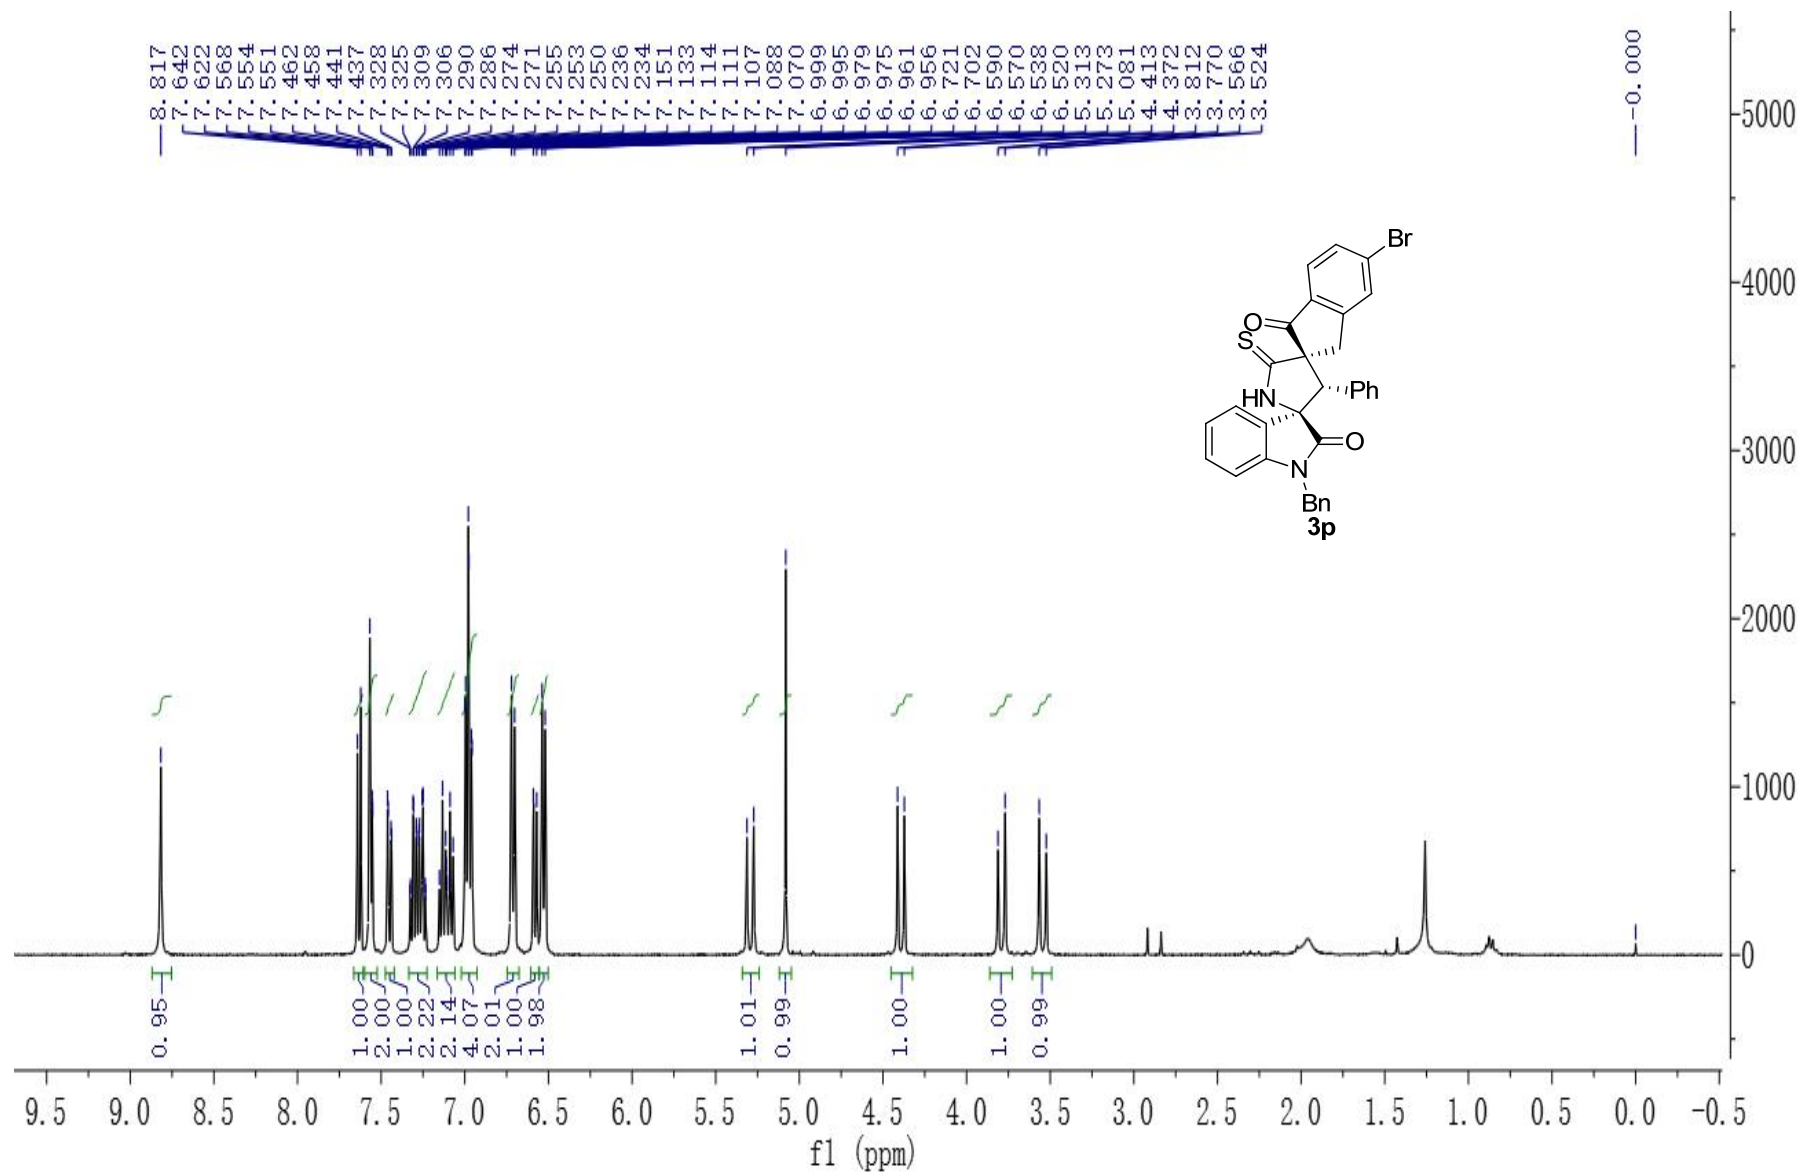

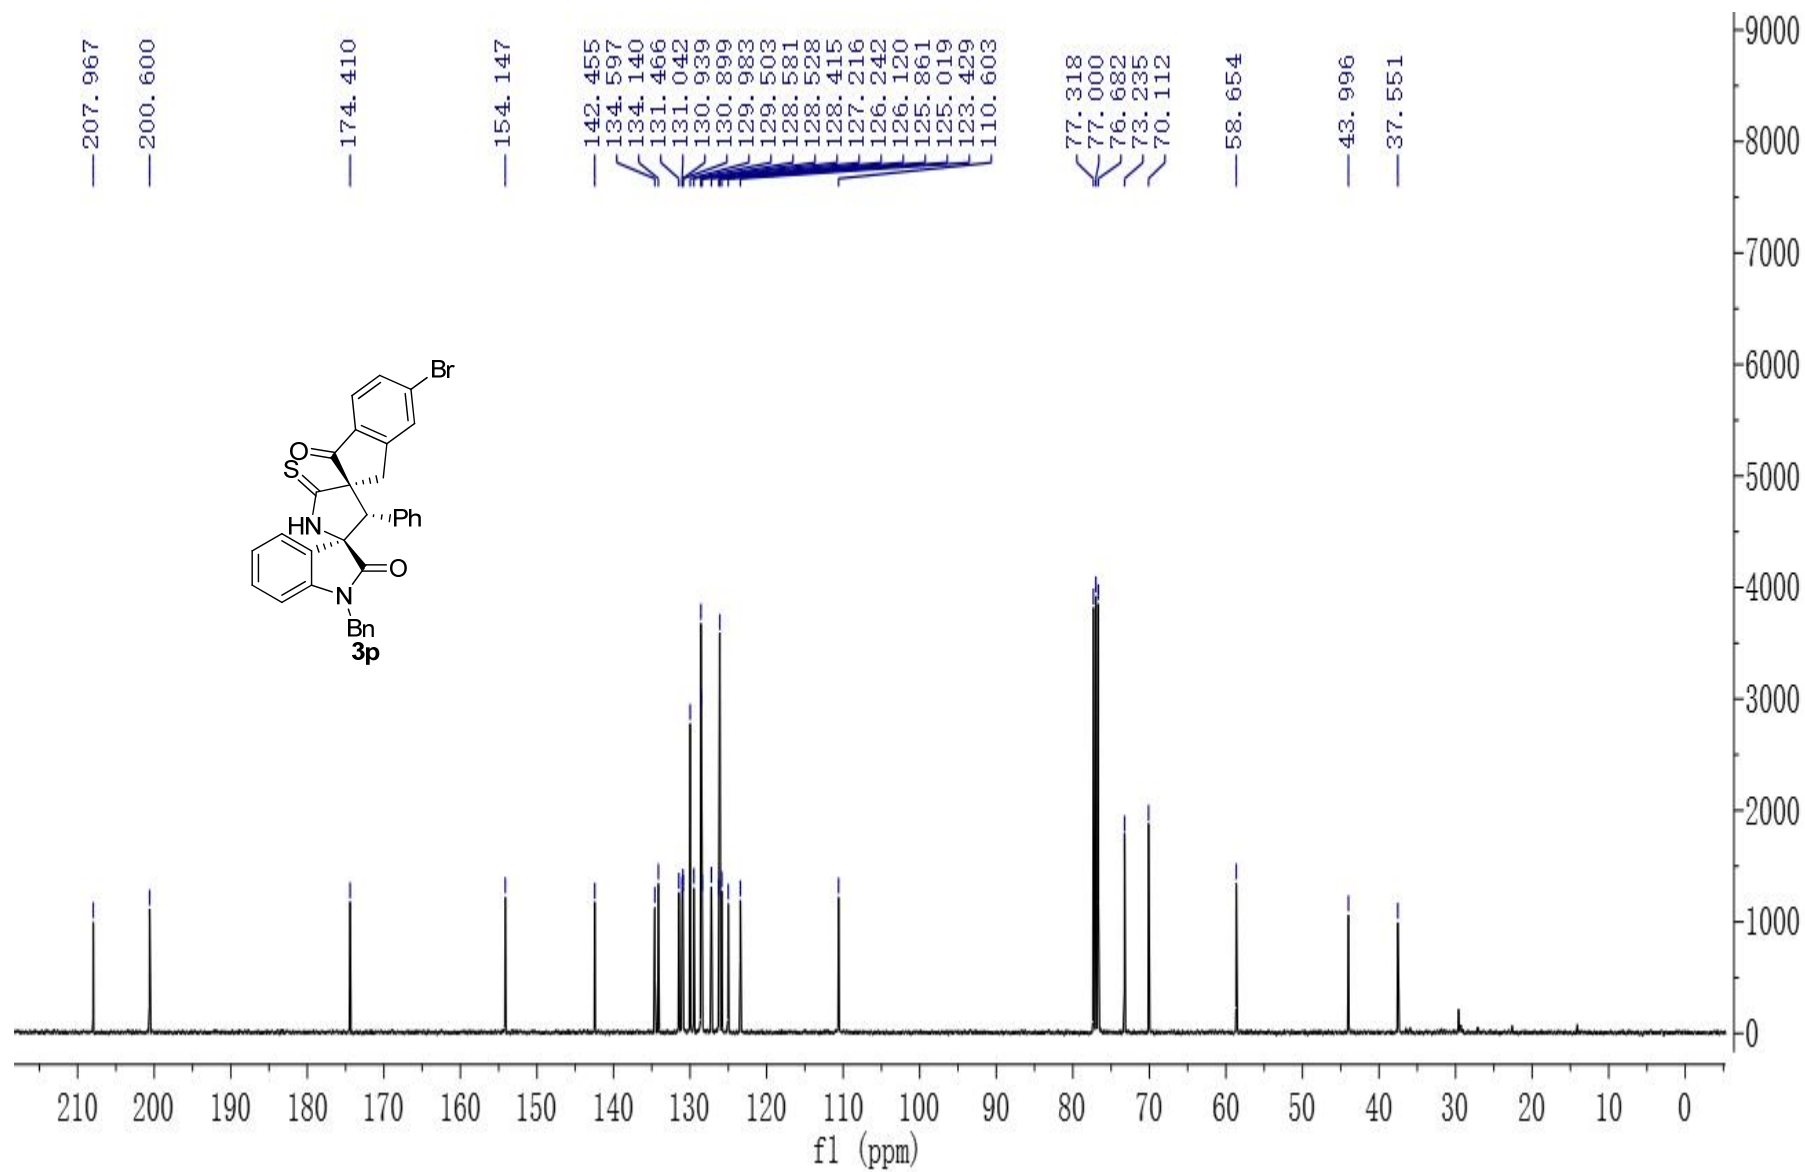

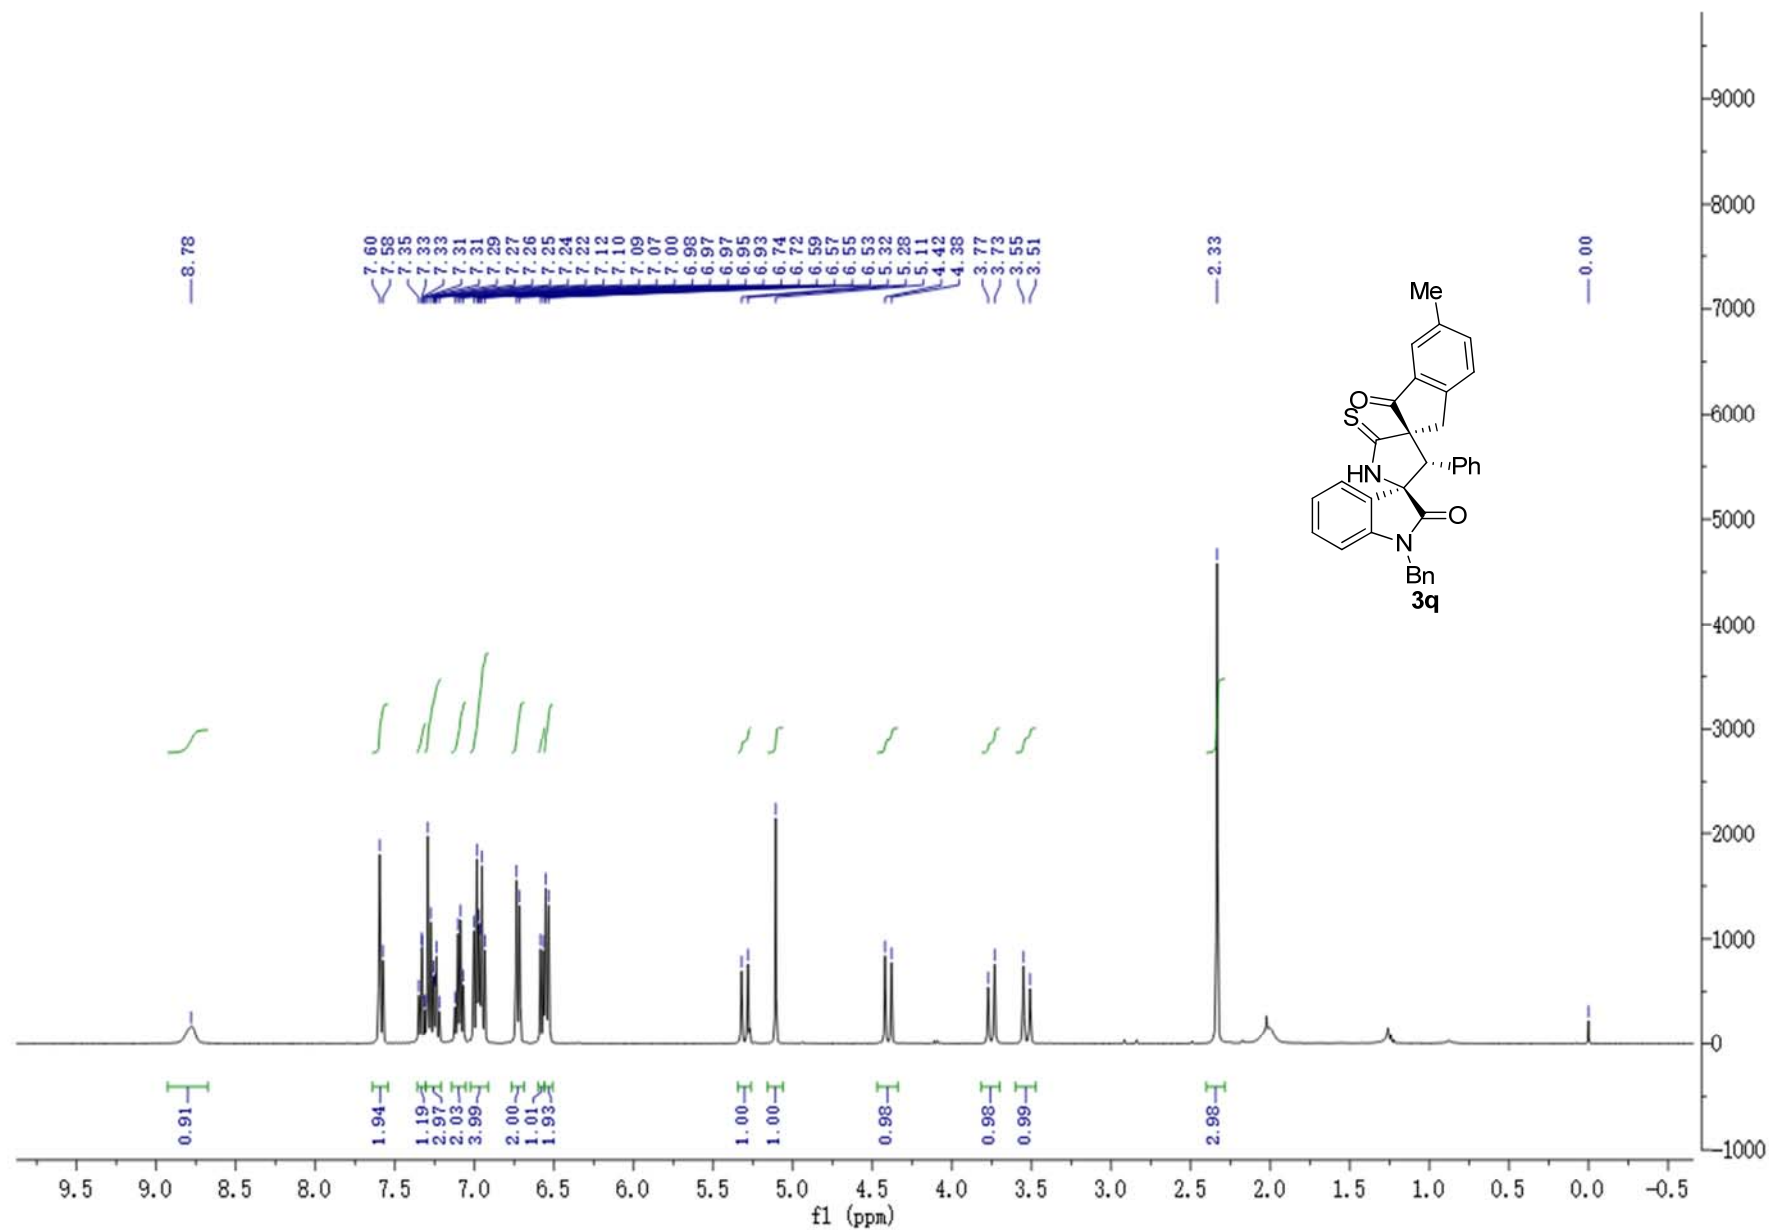

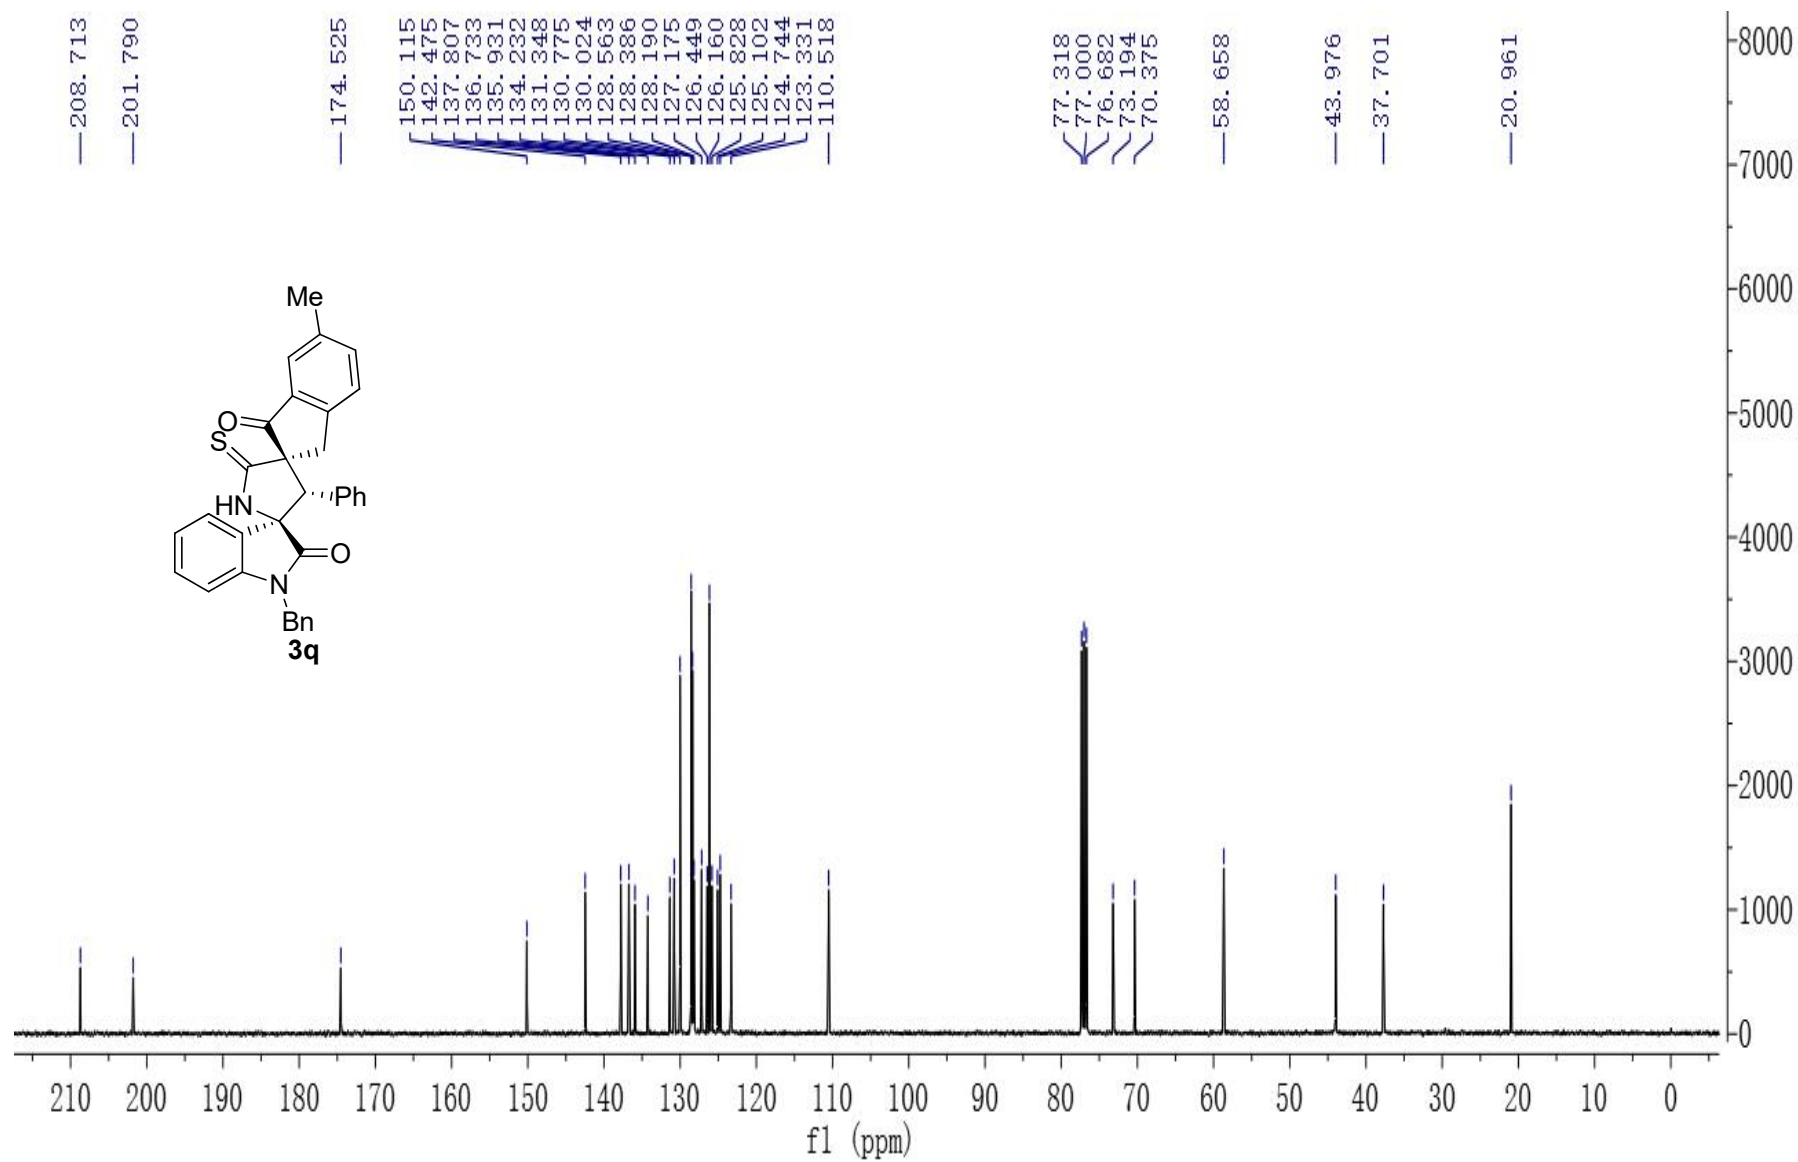

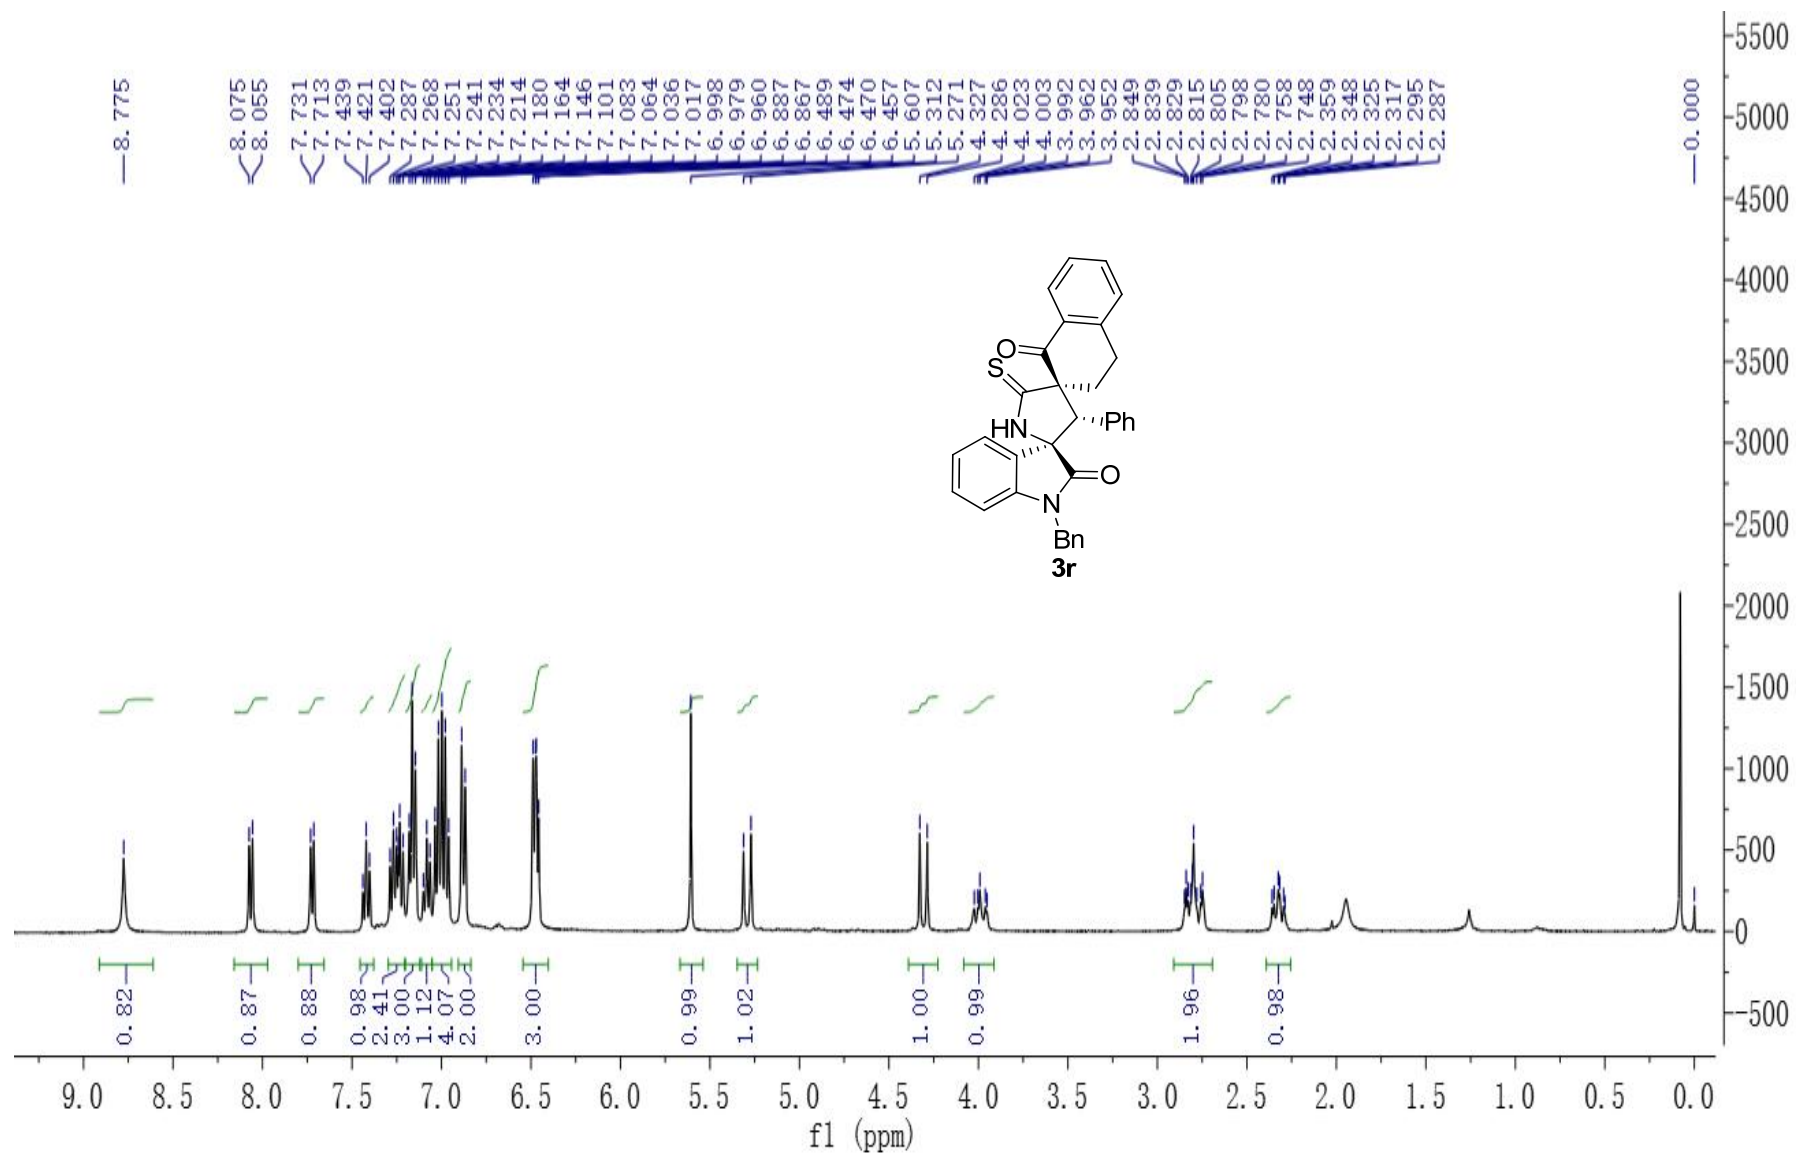



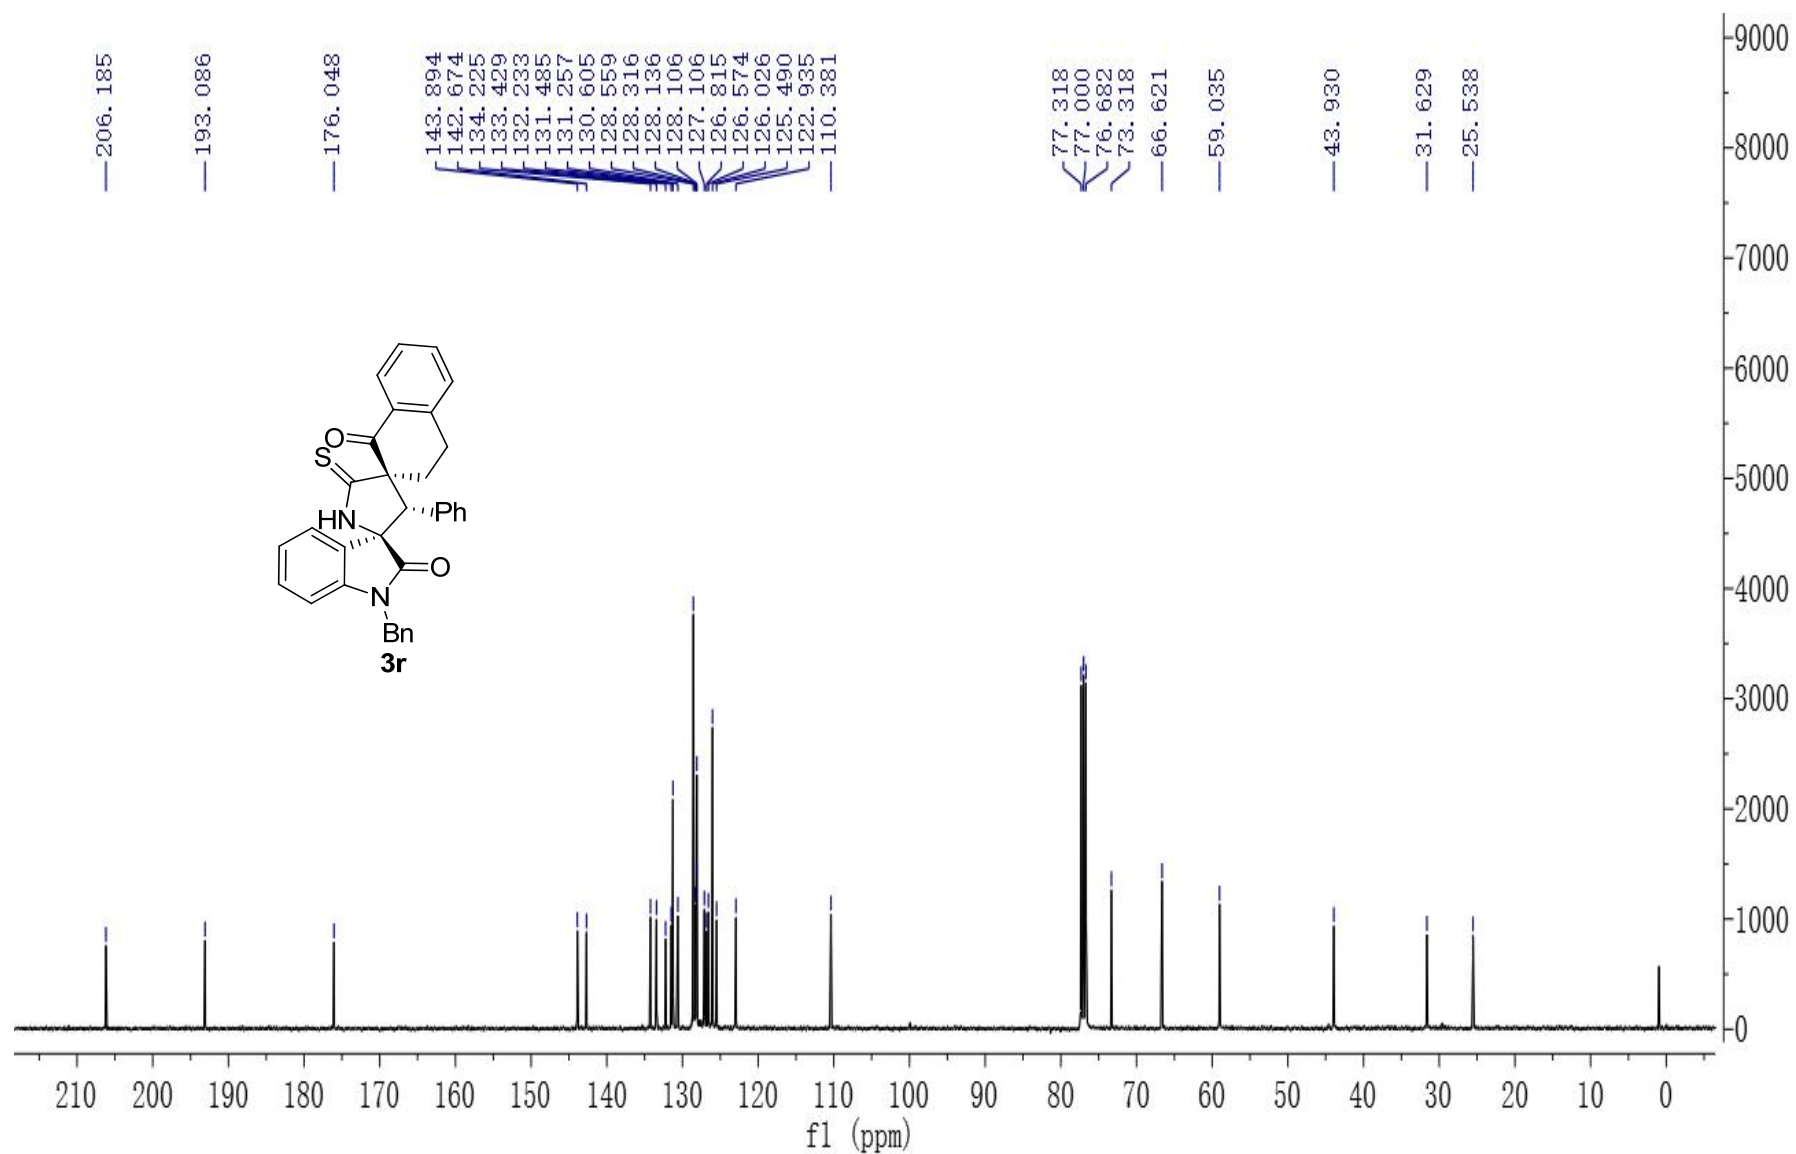

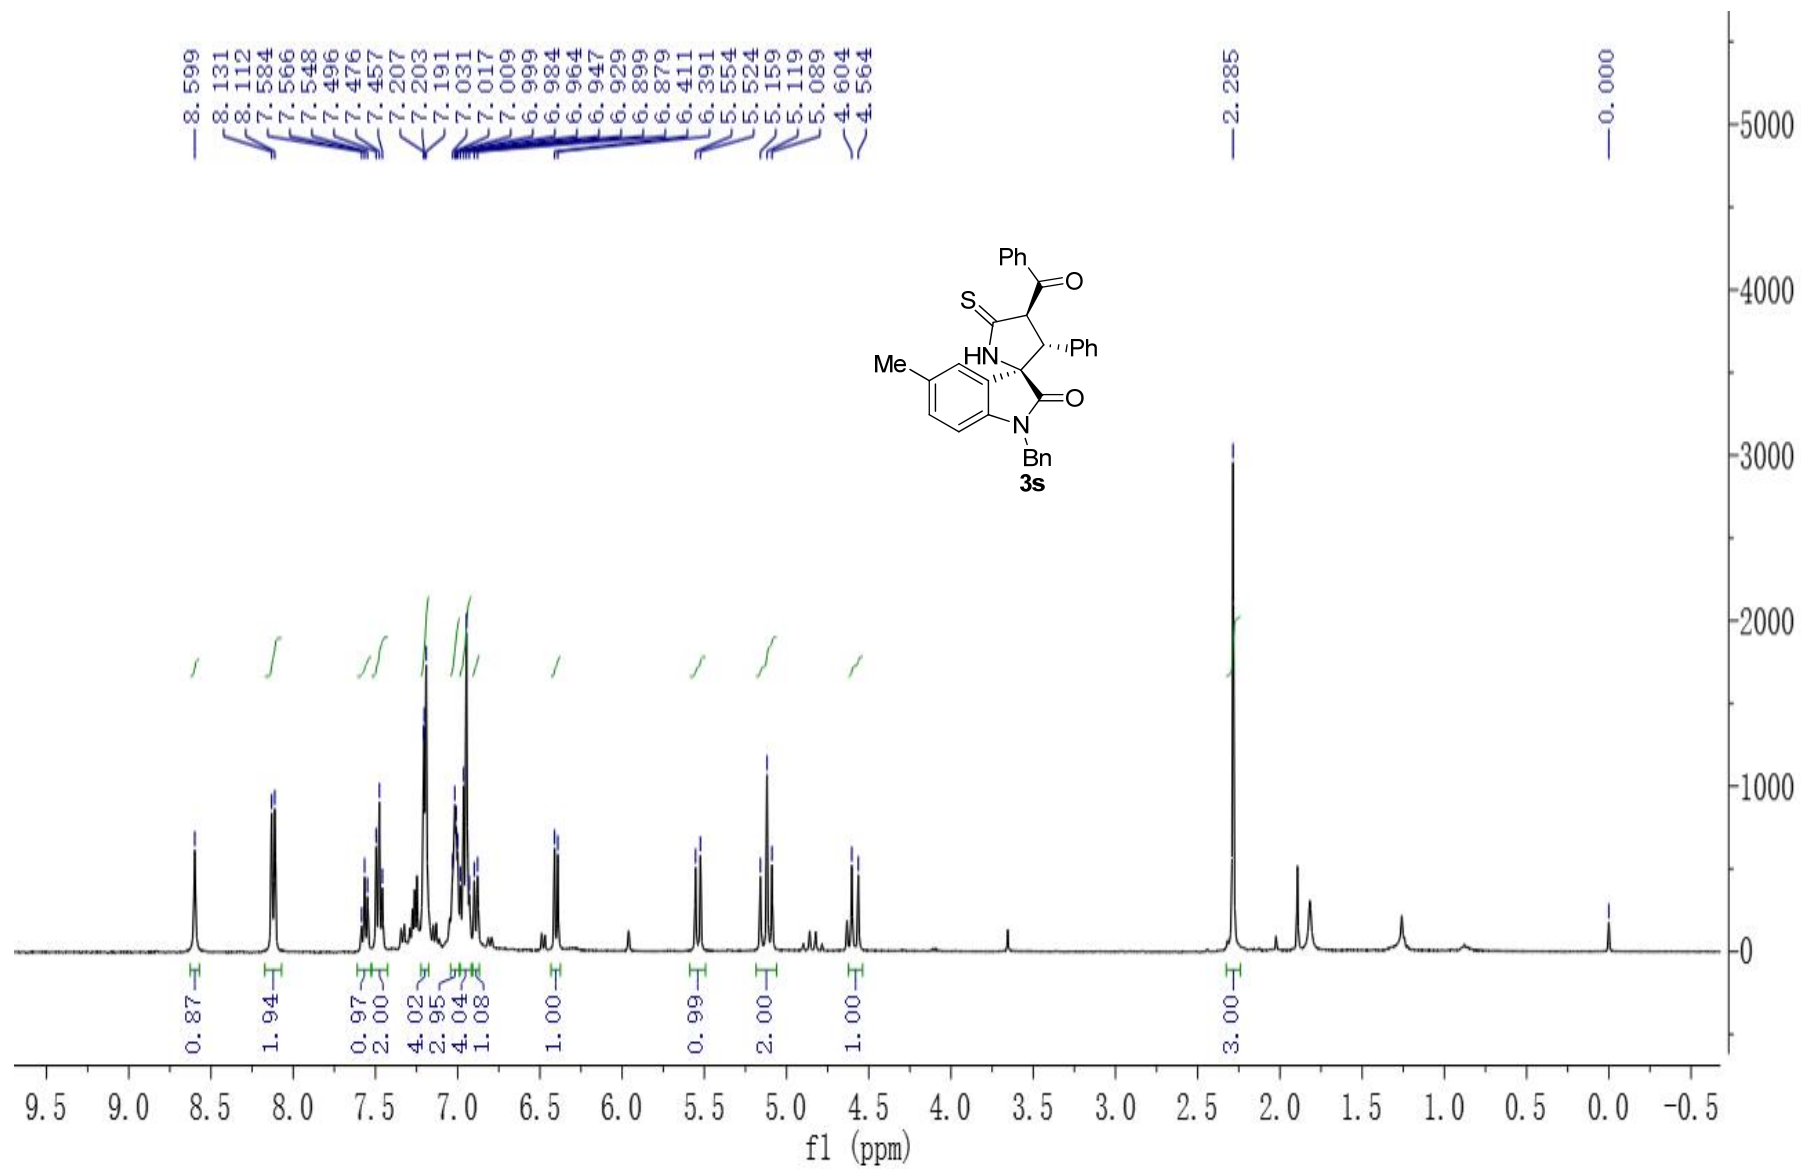

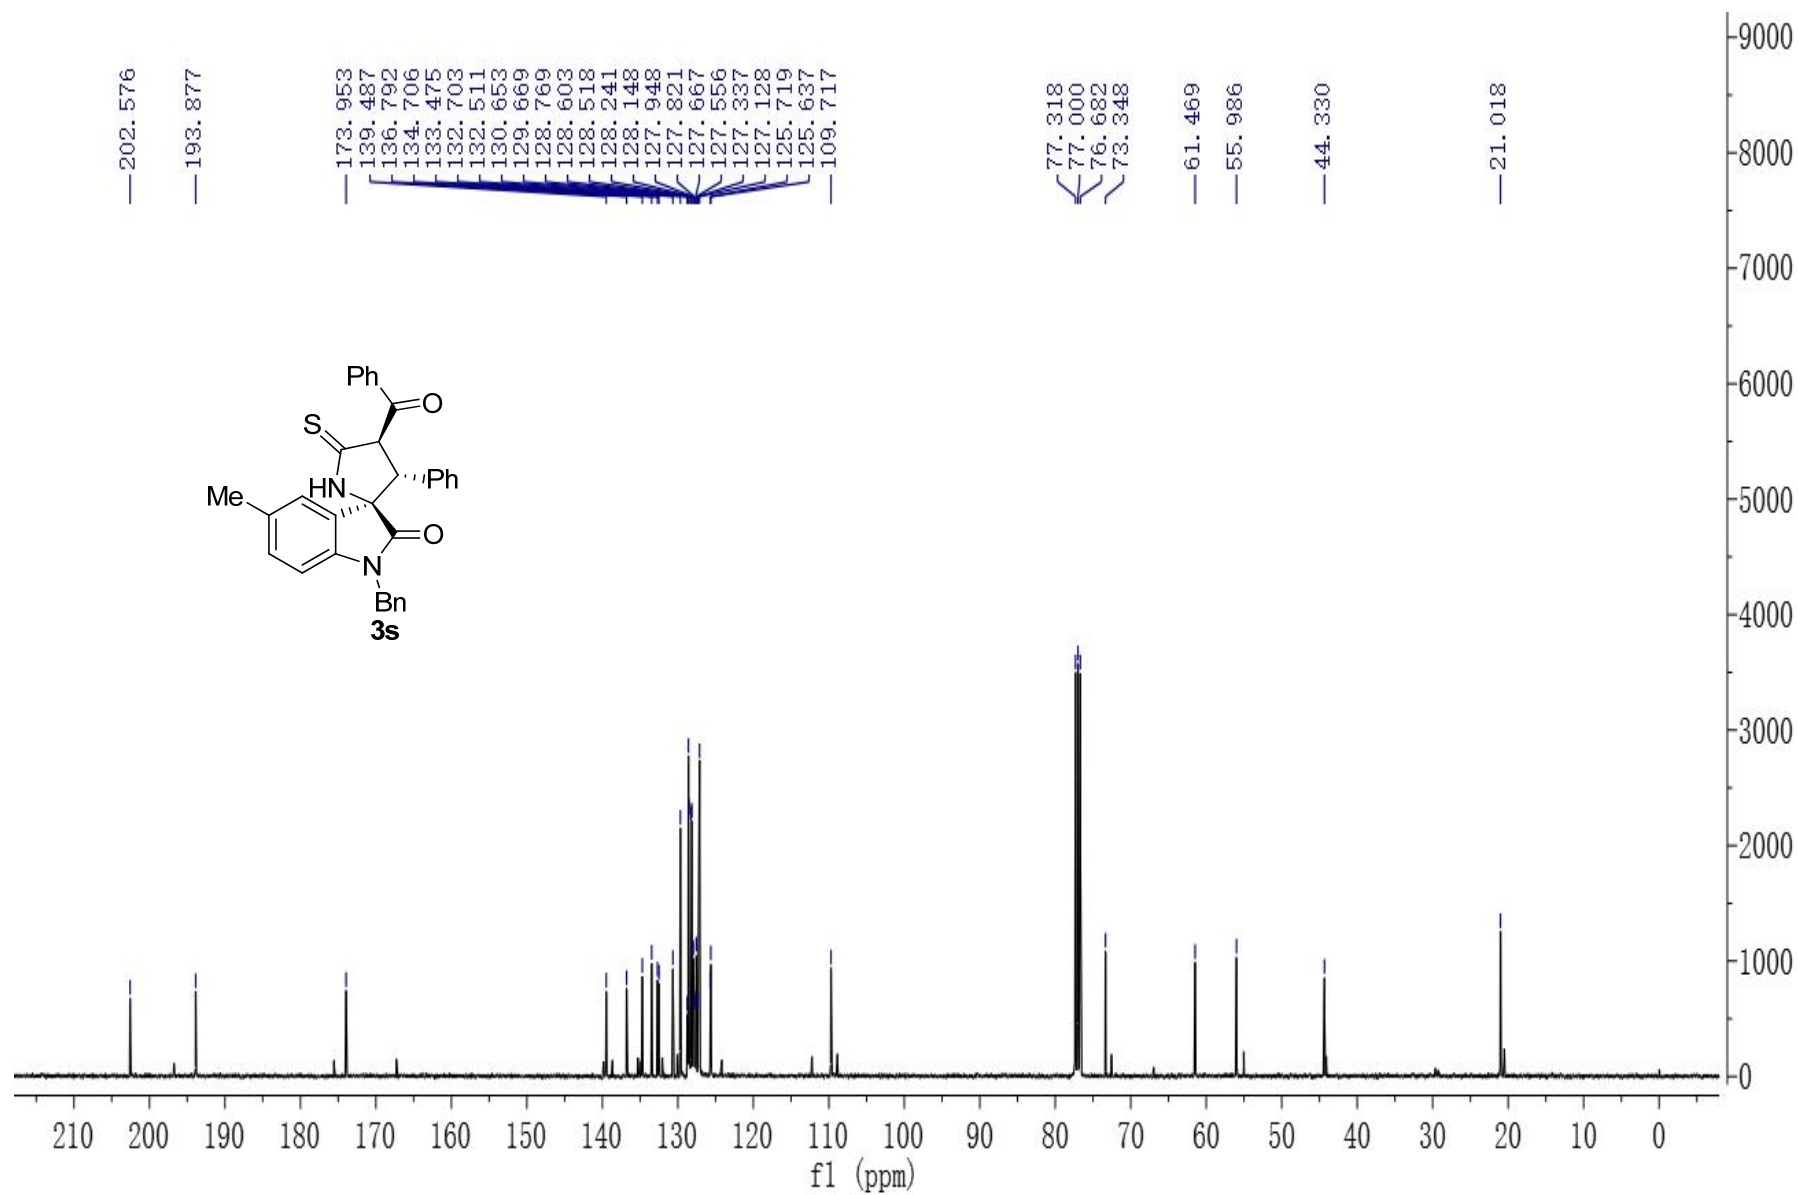

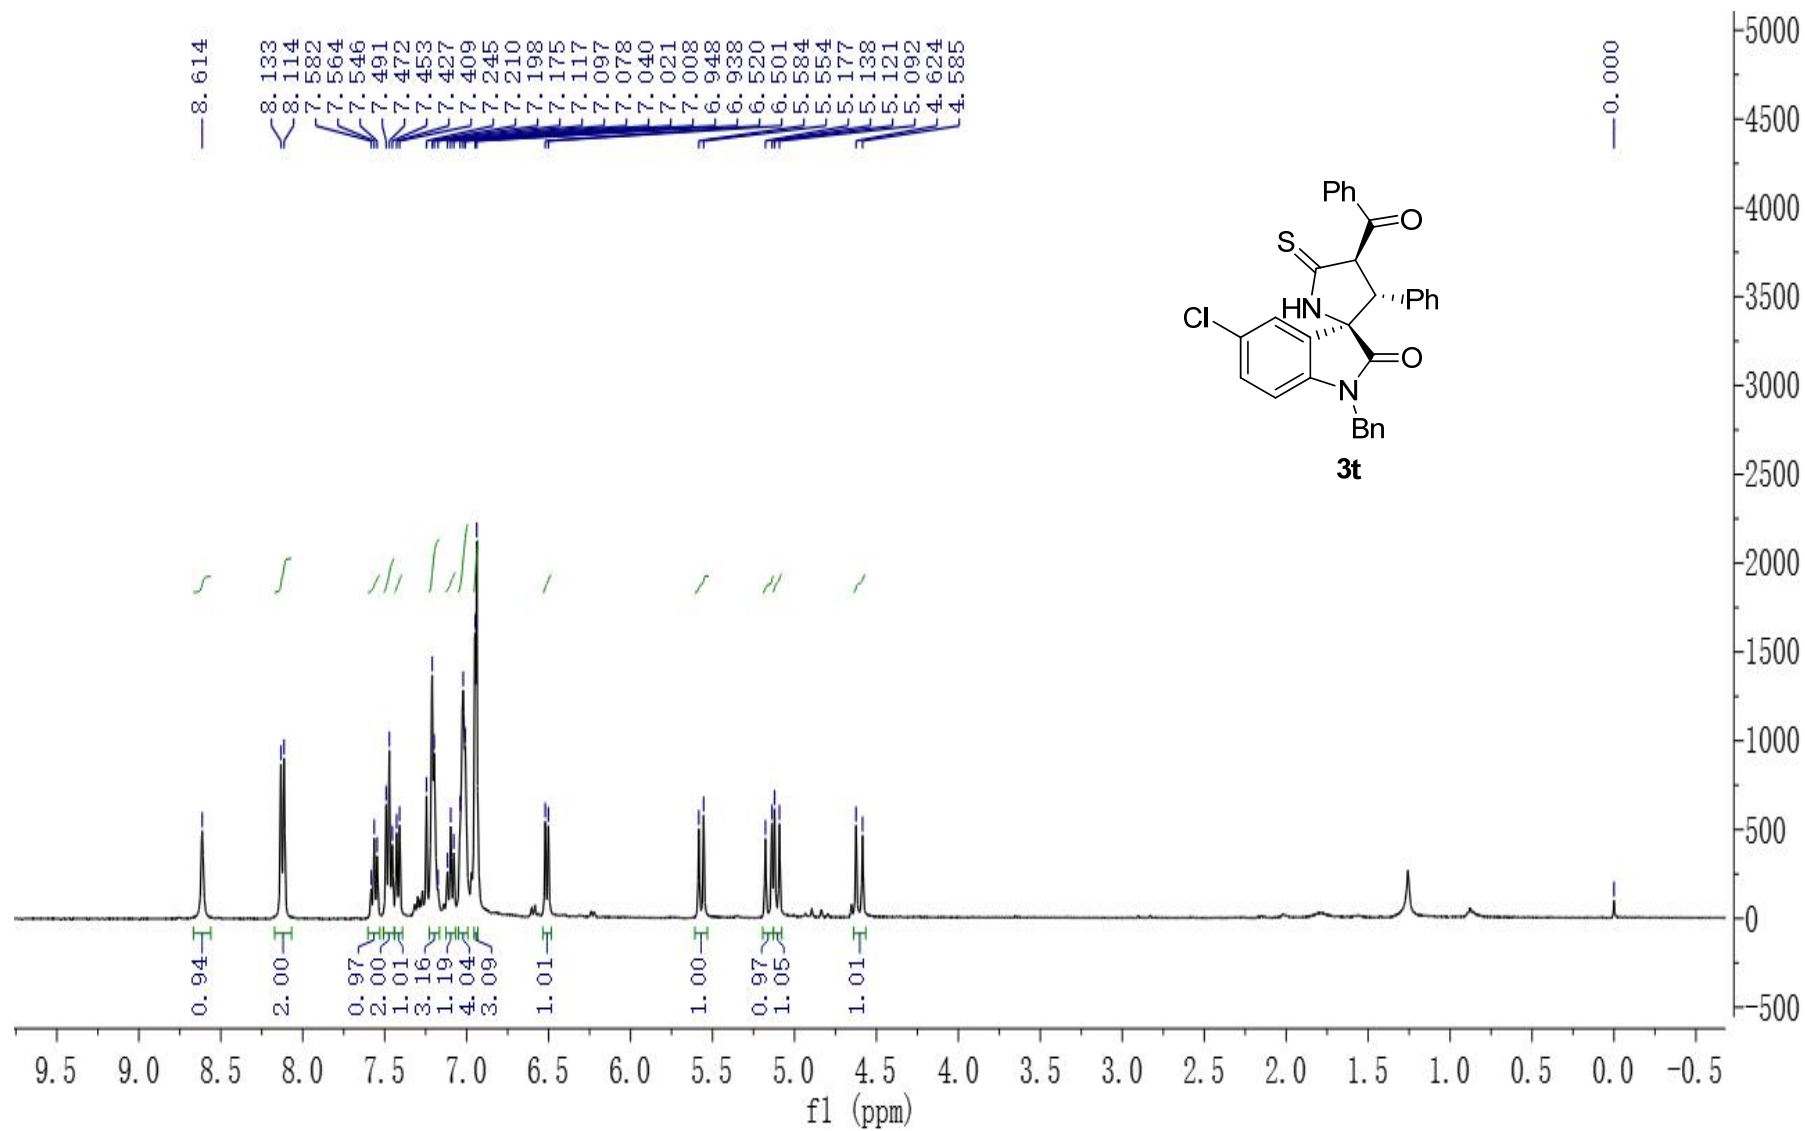

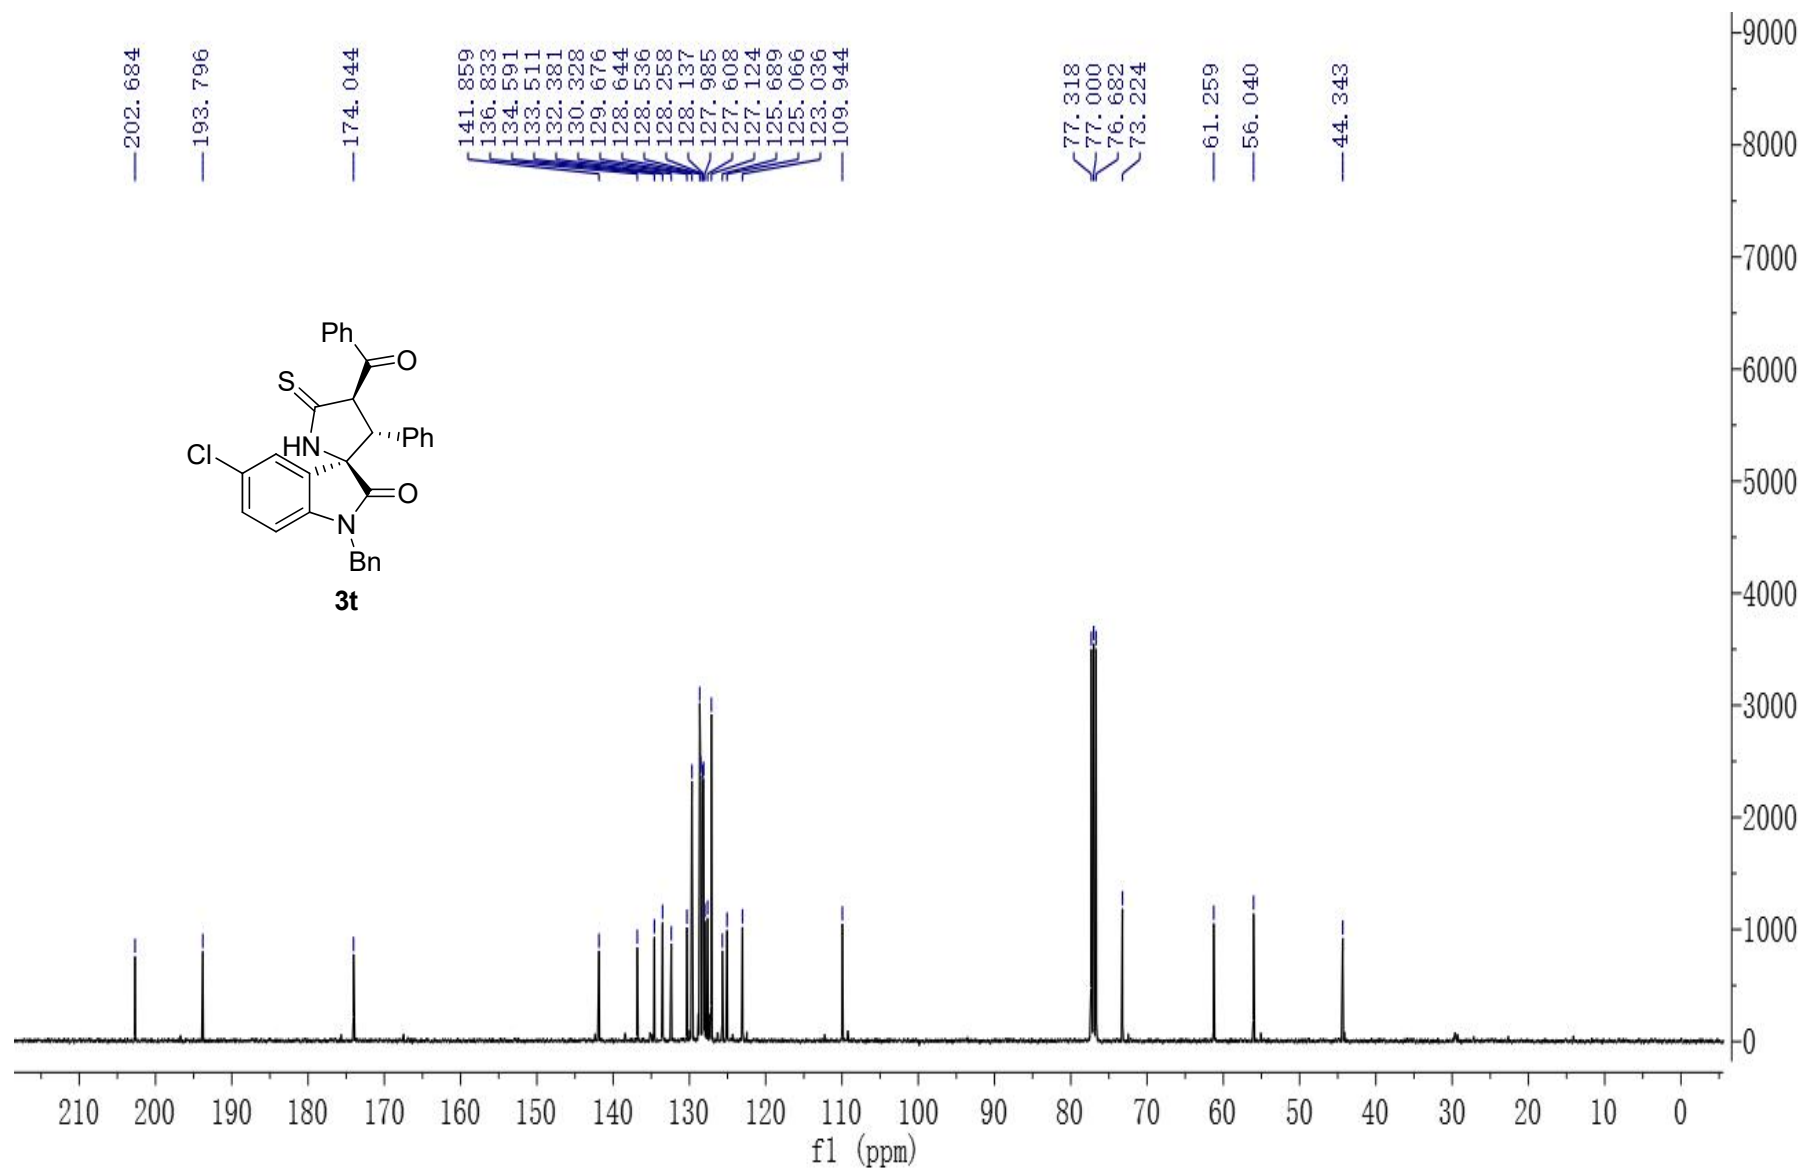

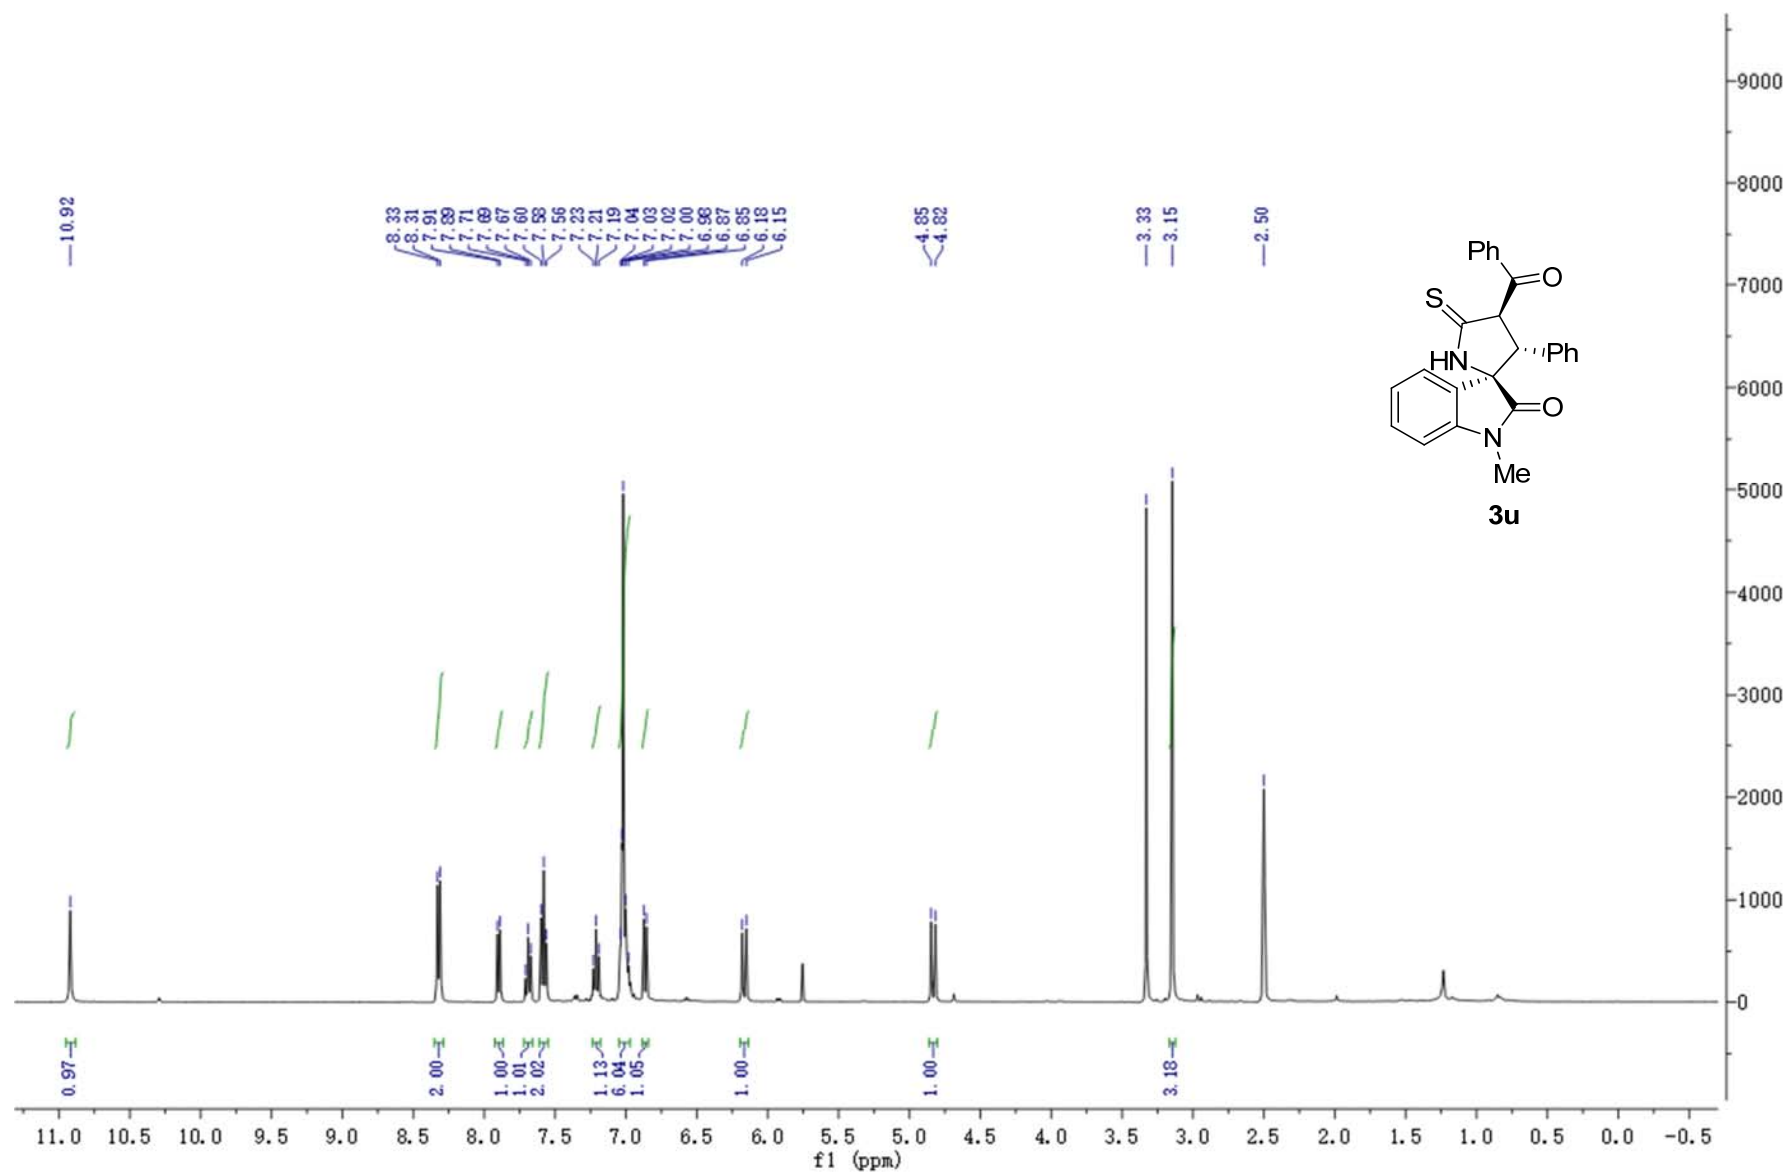

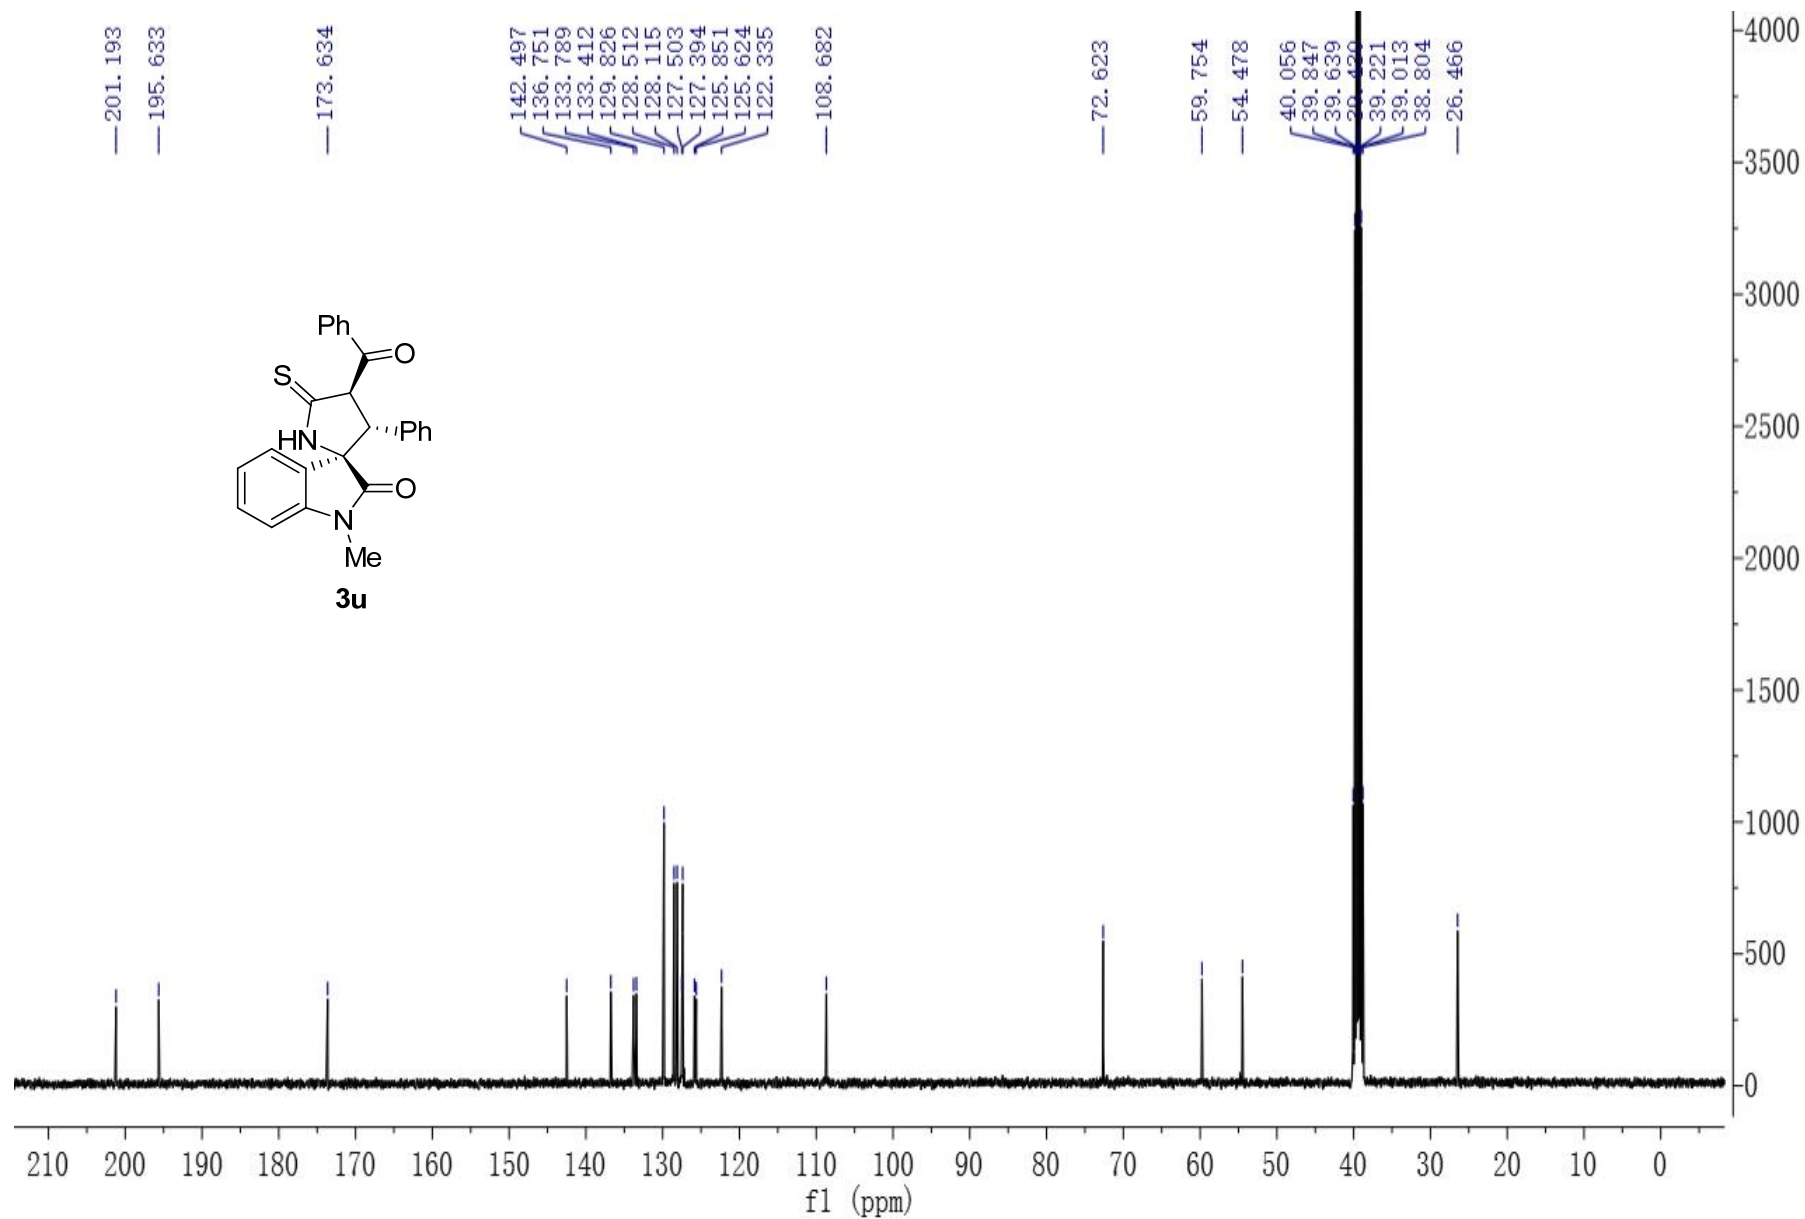

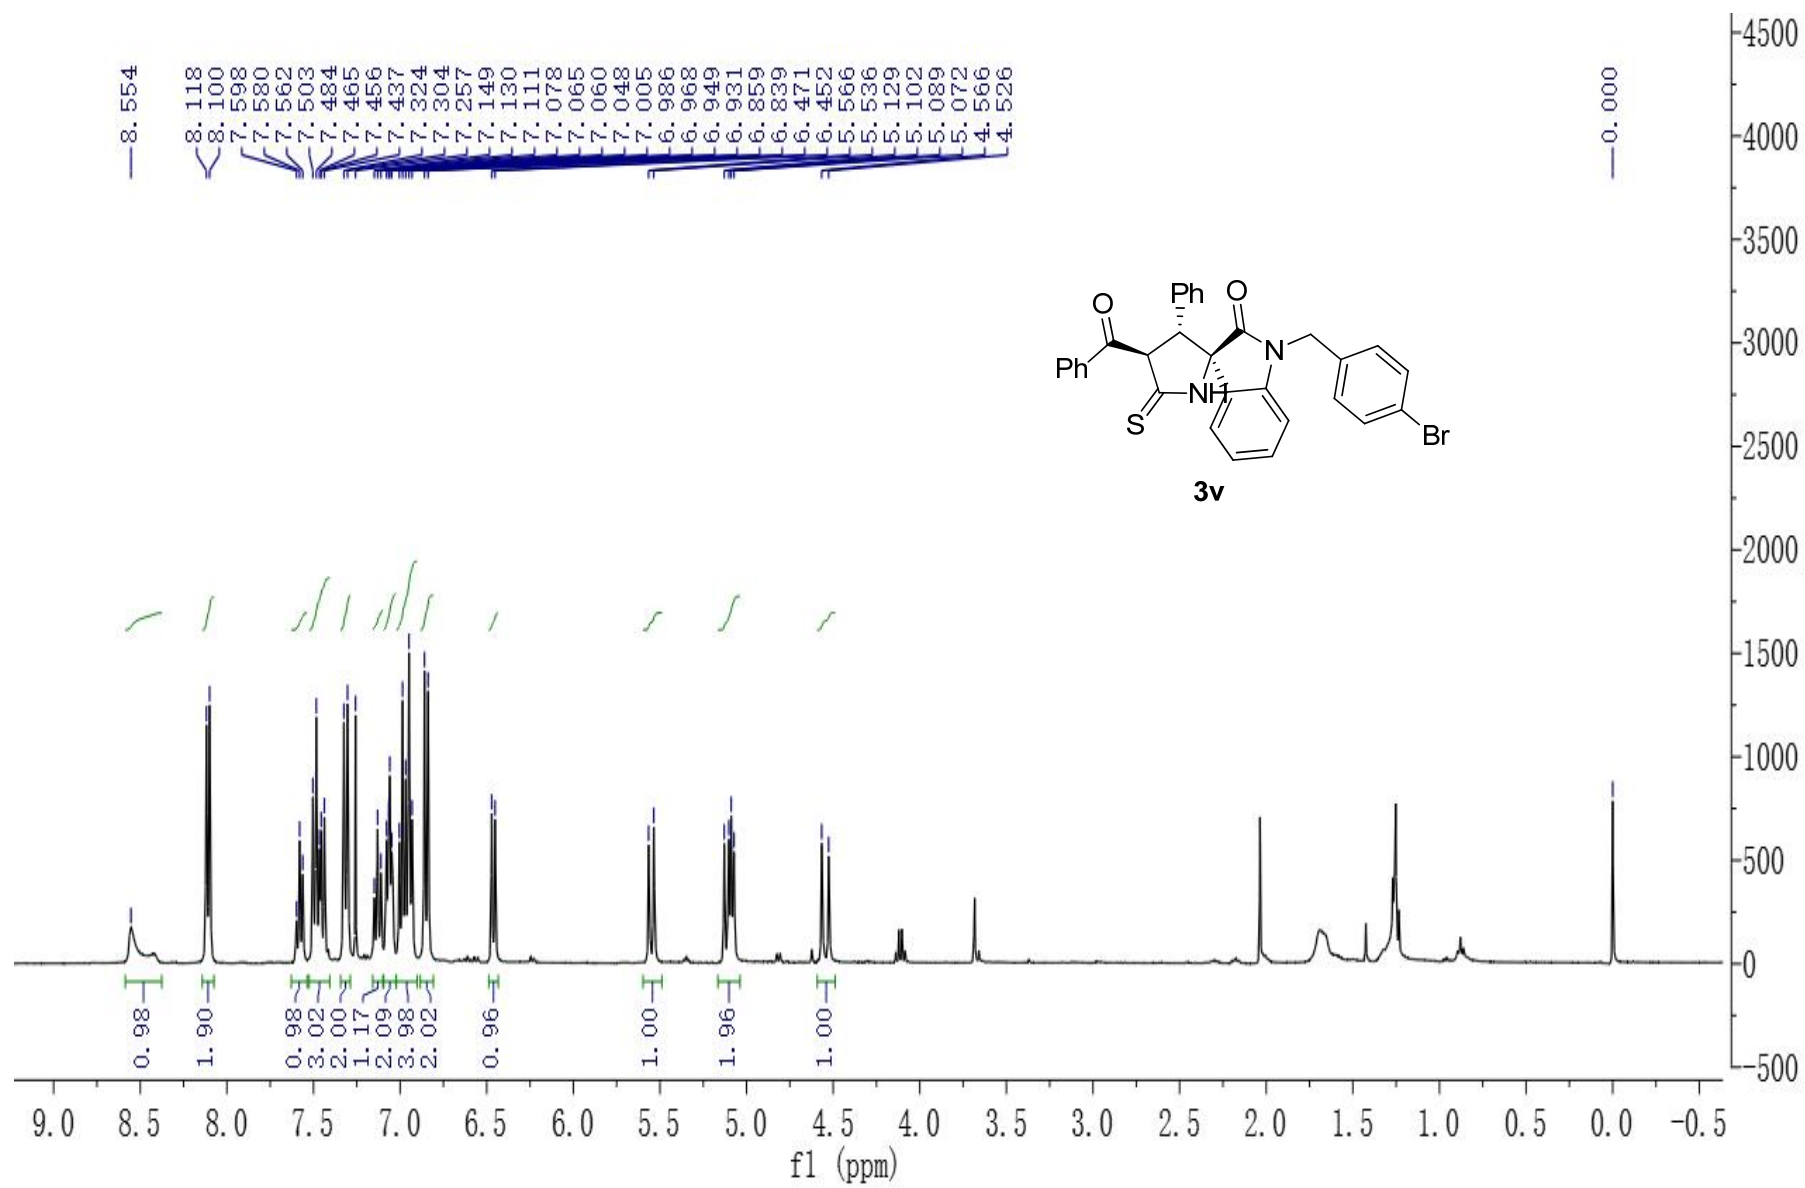



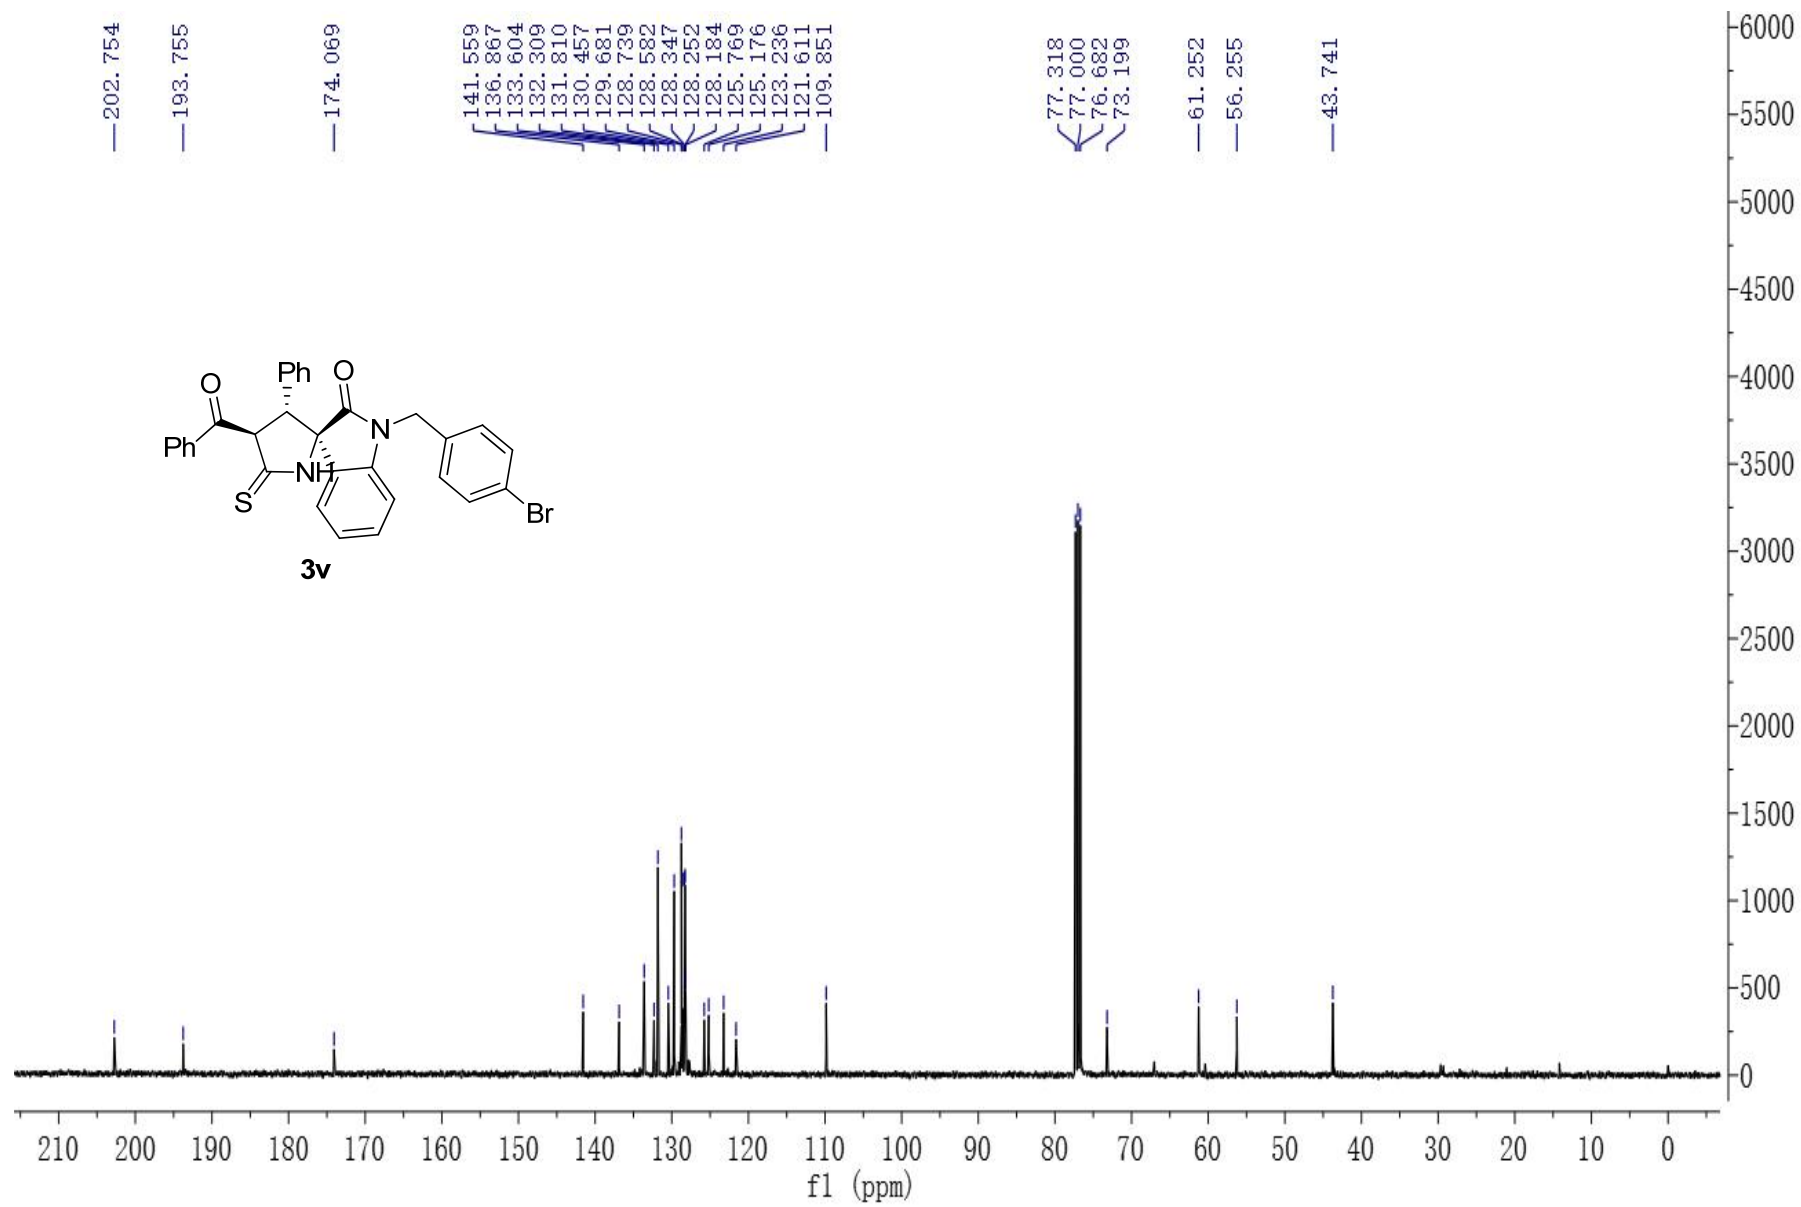

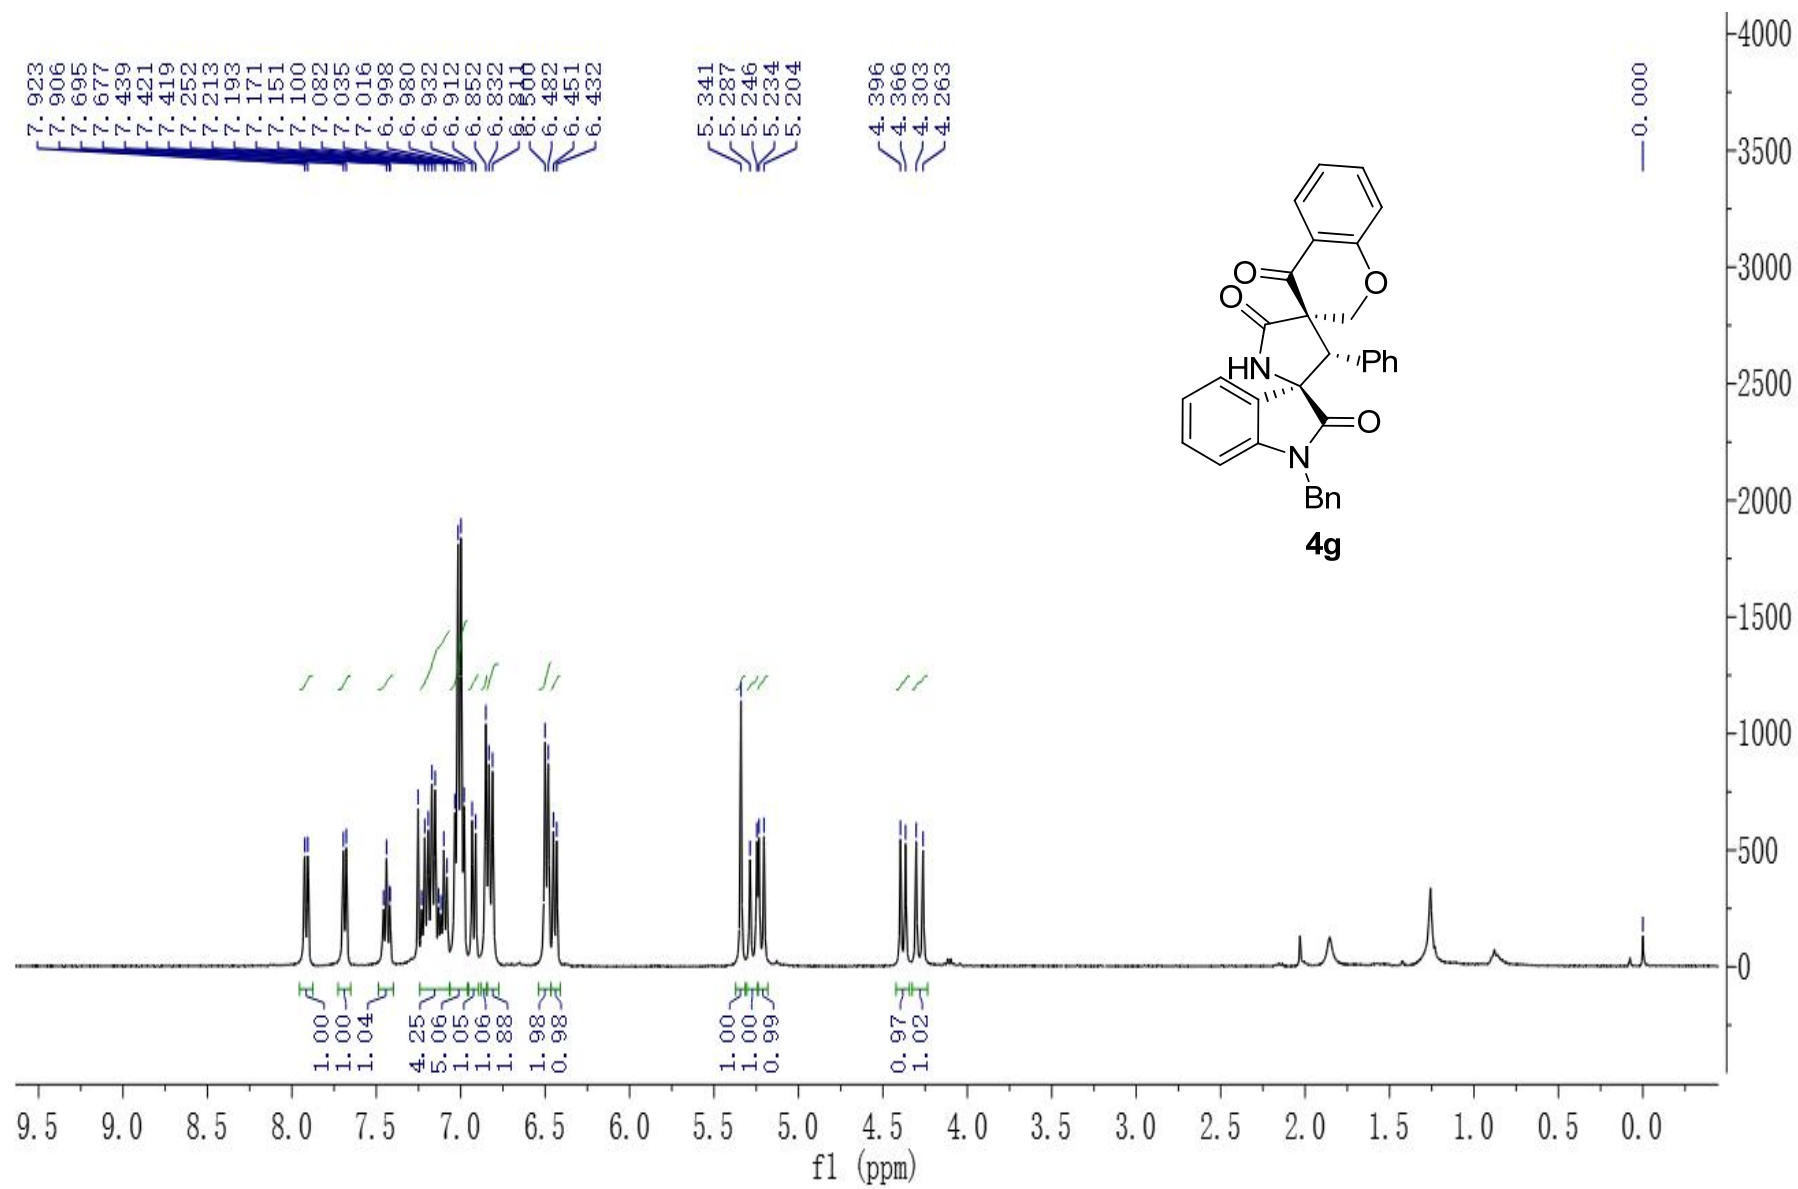

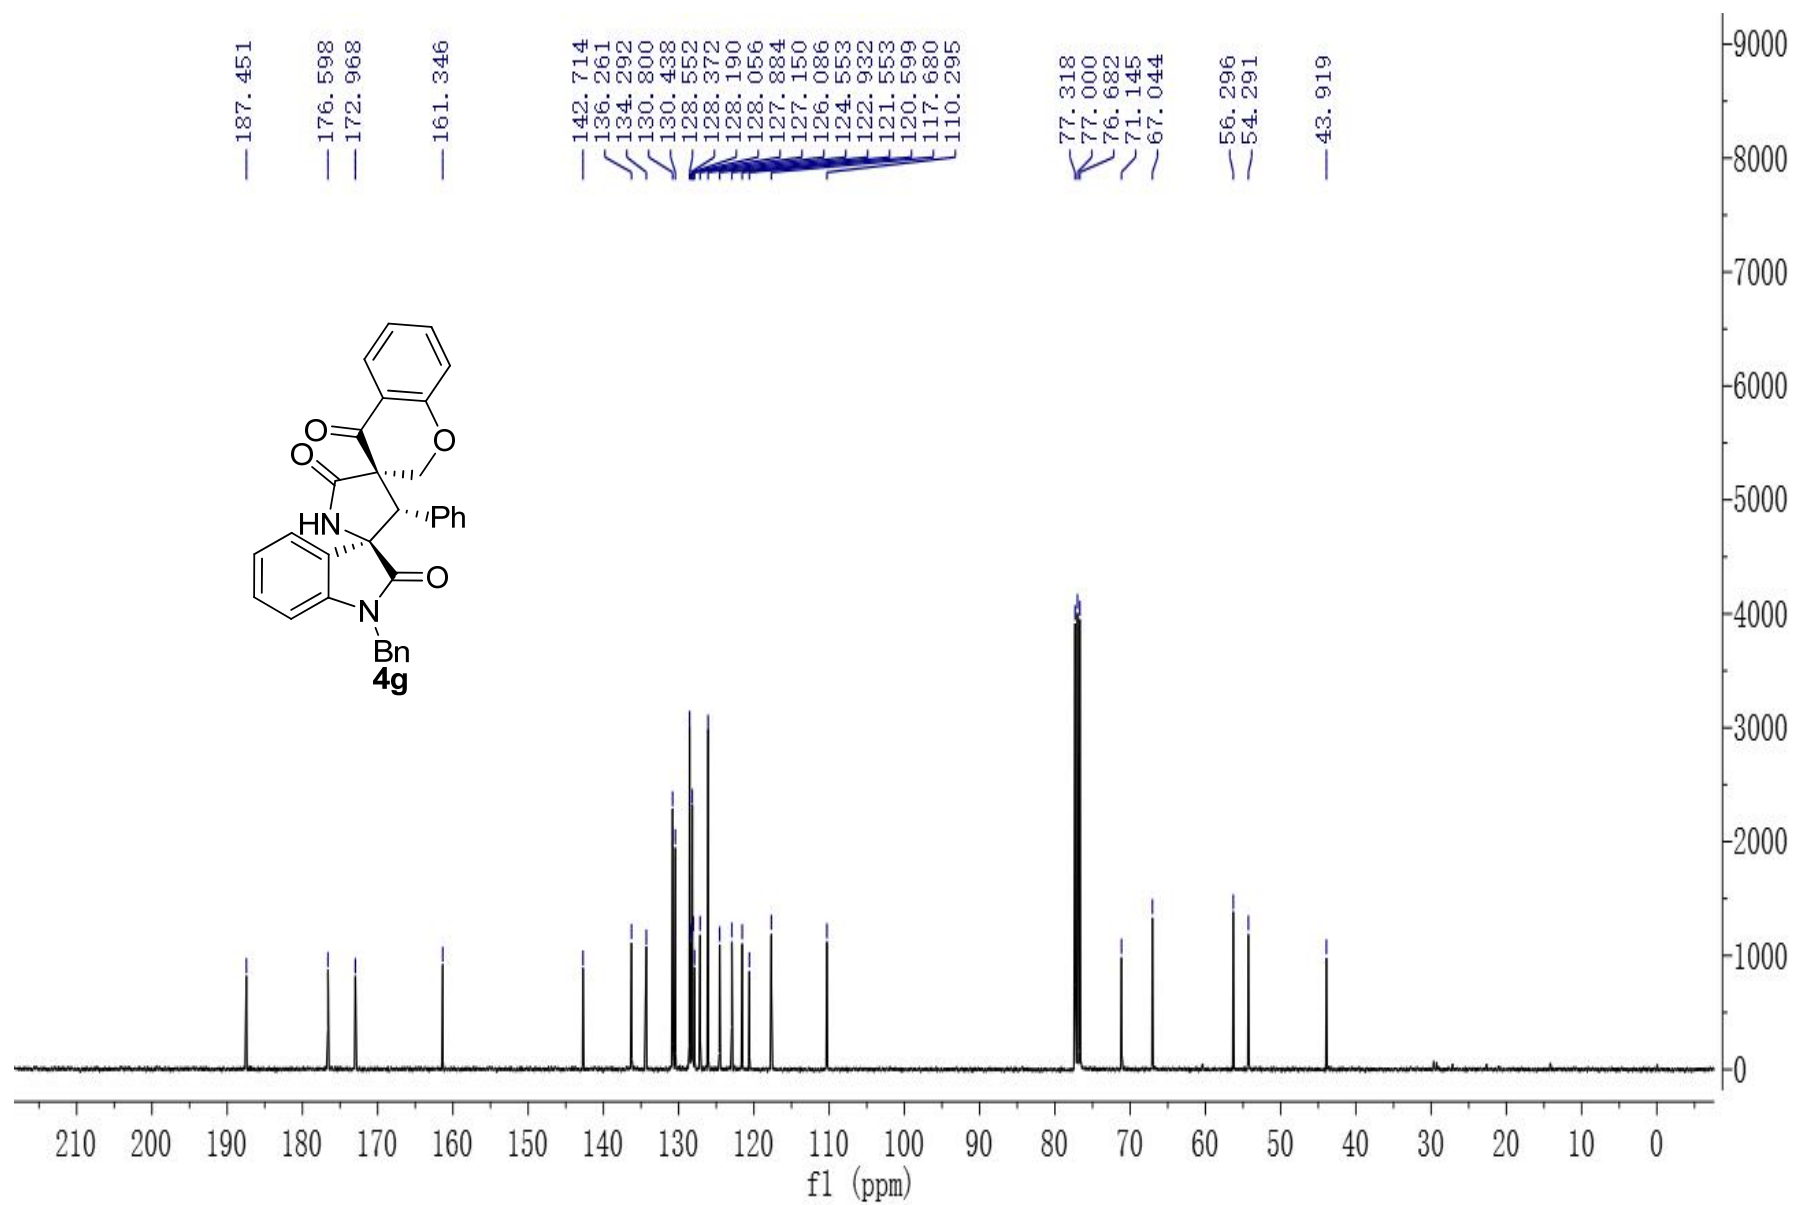

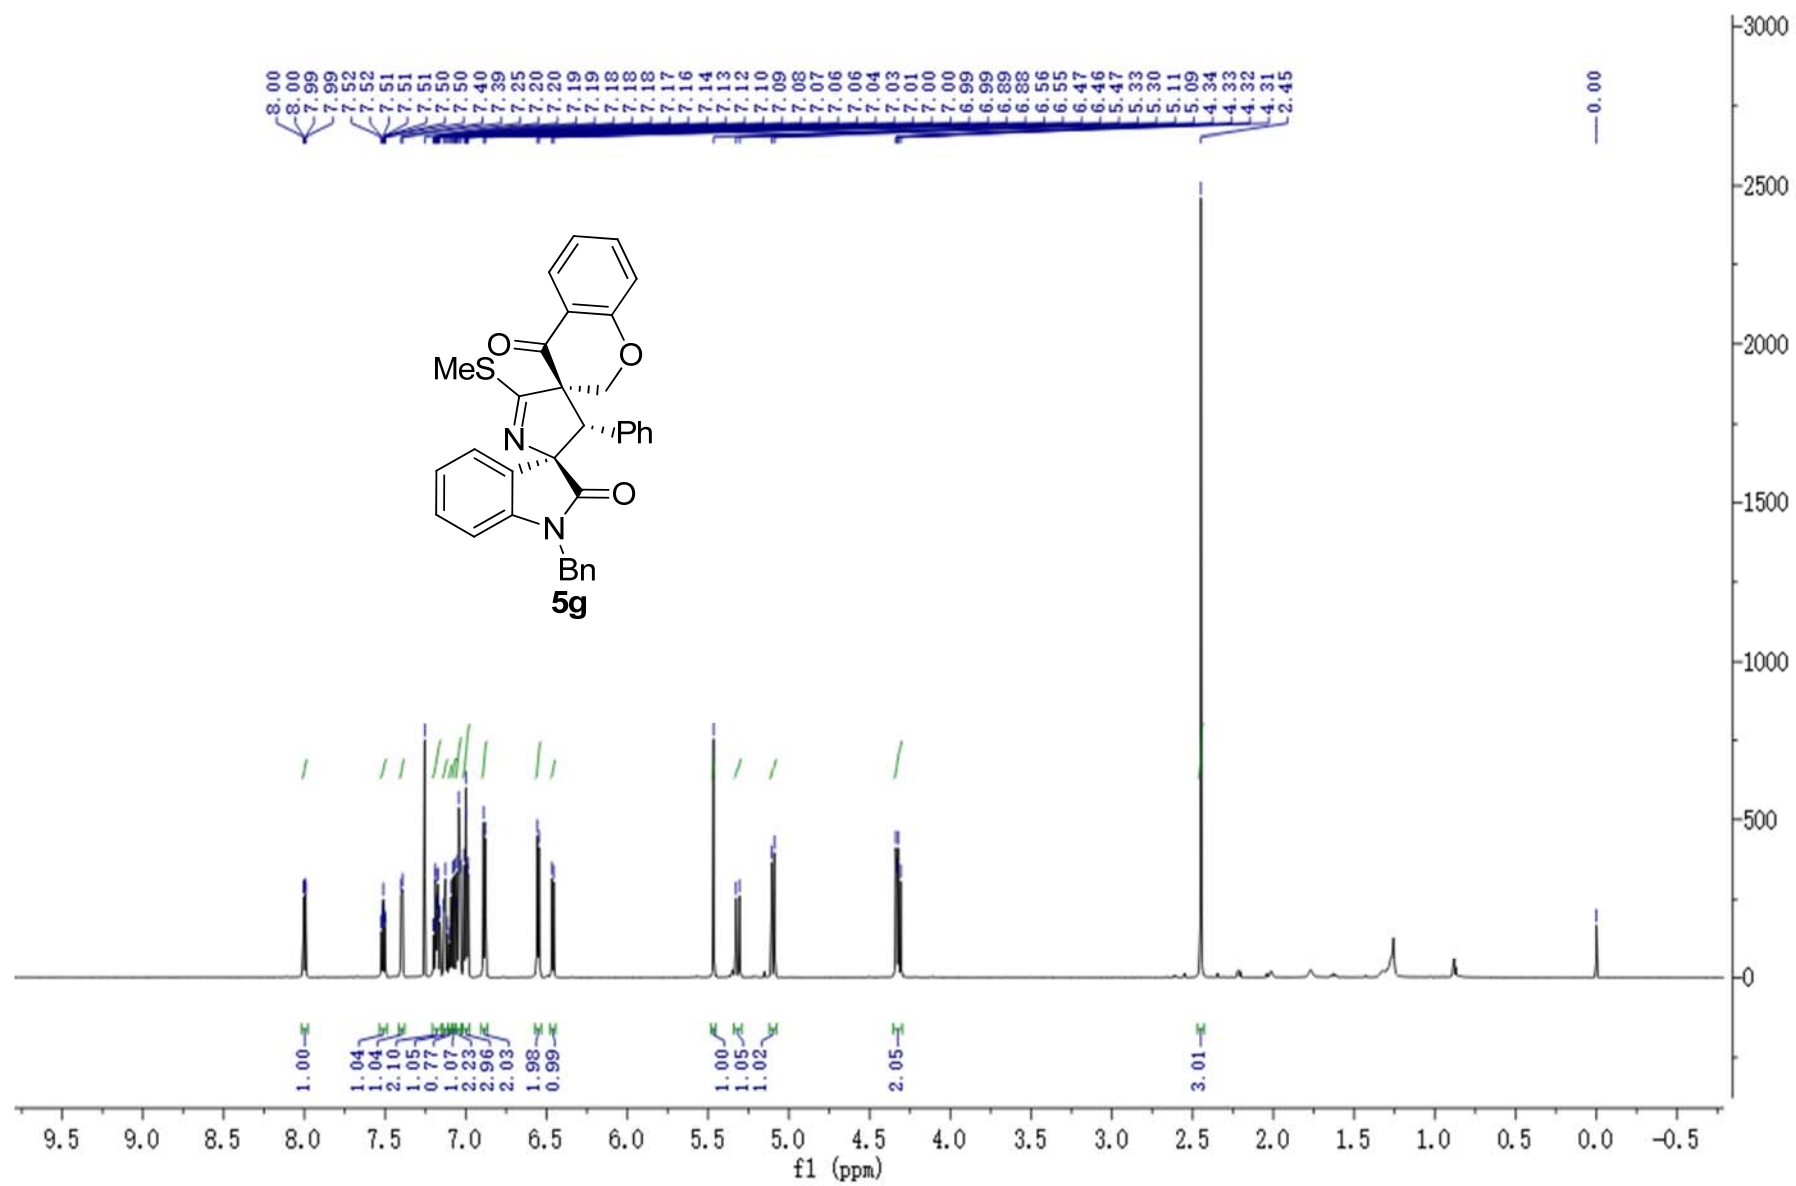

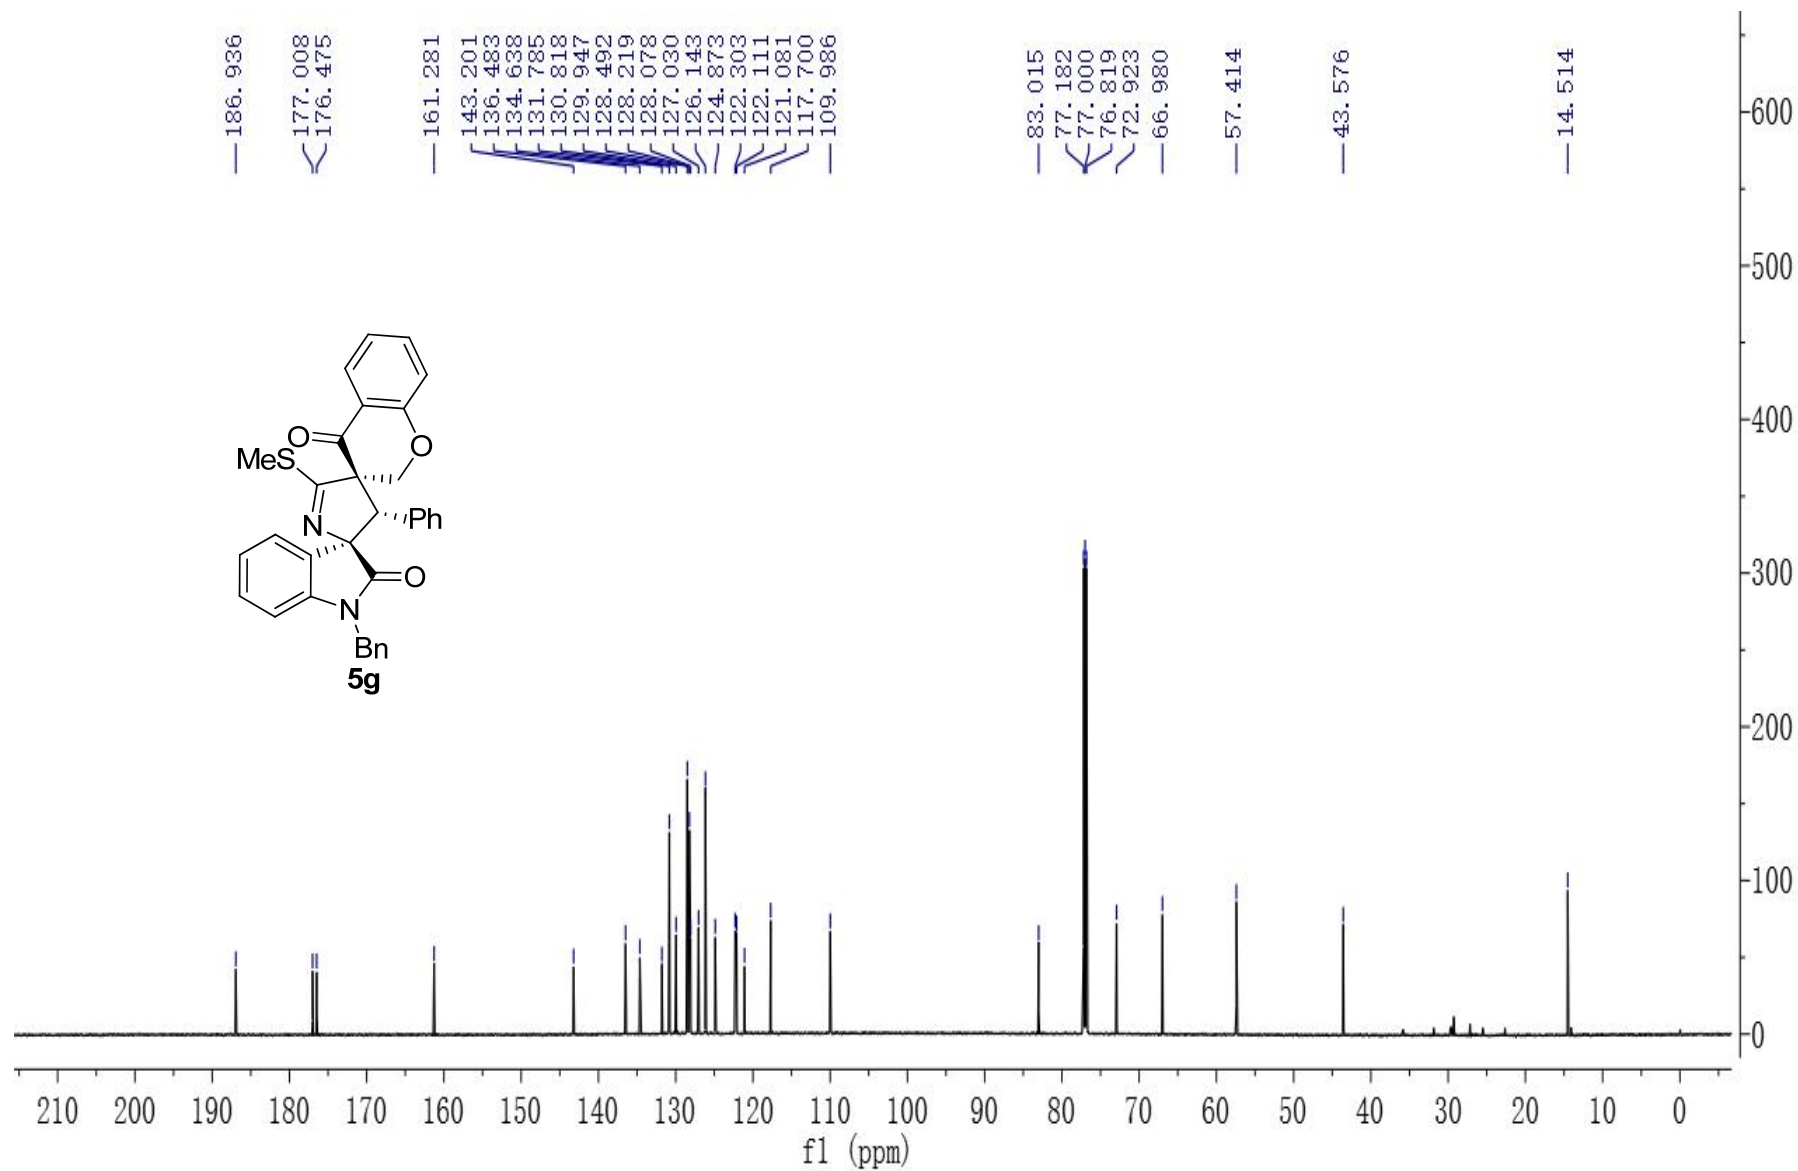

# Copies of HPLC chromatograms

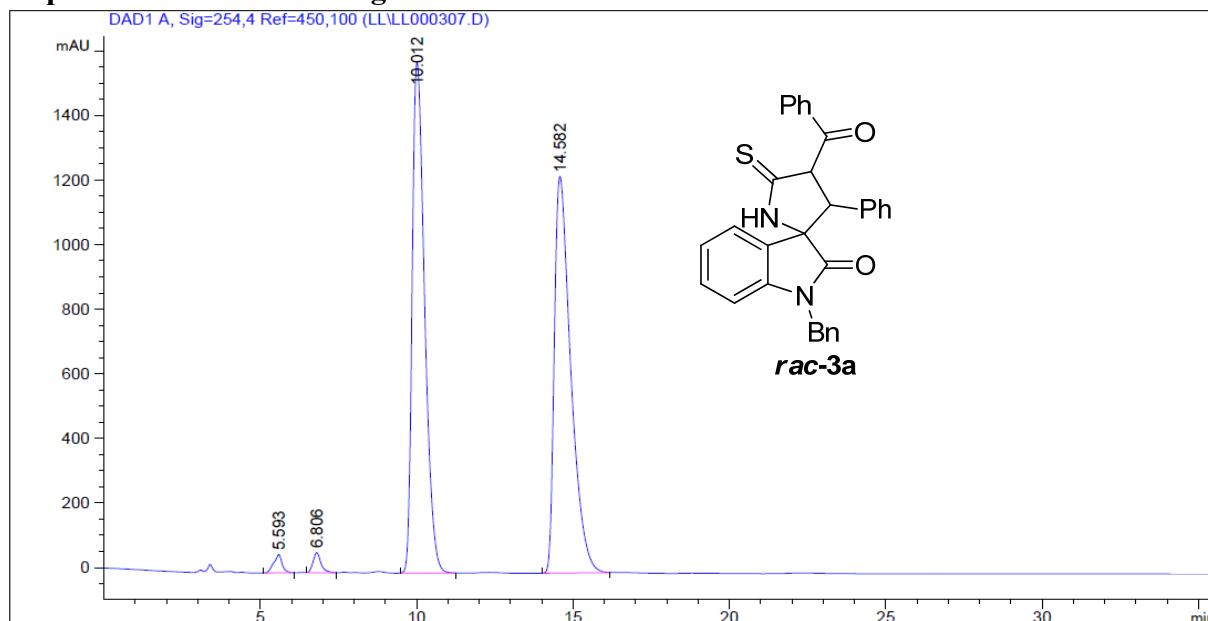

| Peak # | RetTime [min] | Type | Width [min] | Area [mAU*s] | Height [mAU] | Area %  |
|--------|---------------|------|-------------|--------------|--------------|---------|
| 1      | 5.593         | BB   | 0.2583      | 1059.99084   | 56.64761     | 1.1704  |
| 2      | 6.806         | BB   | 0.2620      | 1088.62195   | 62.24855     | 1.2020  |
| 3      | 10.012        | BB   | 0.4256      | 4.36153e4    | 1582.12781   | 48.1566 |
| 4      | 14.582        | BB   | 0.5476      | 4.48058e4    | 1228.22571   | 49.4711 |

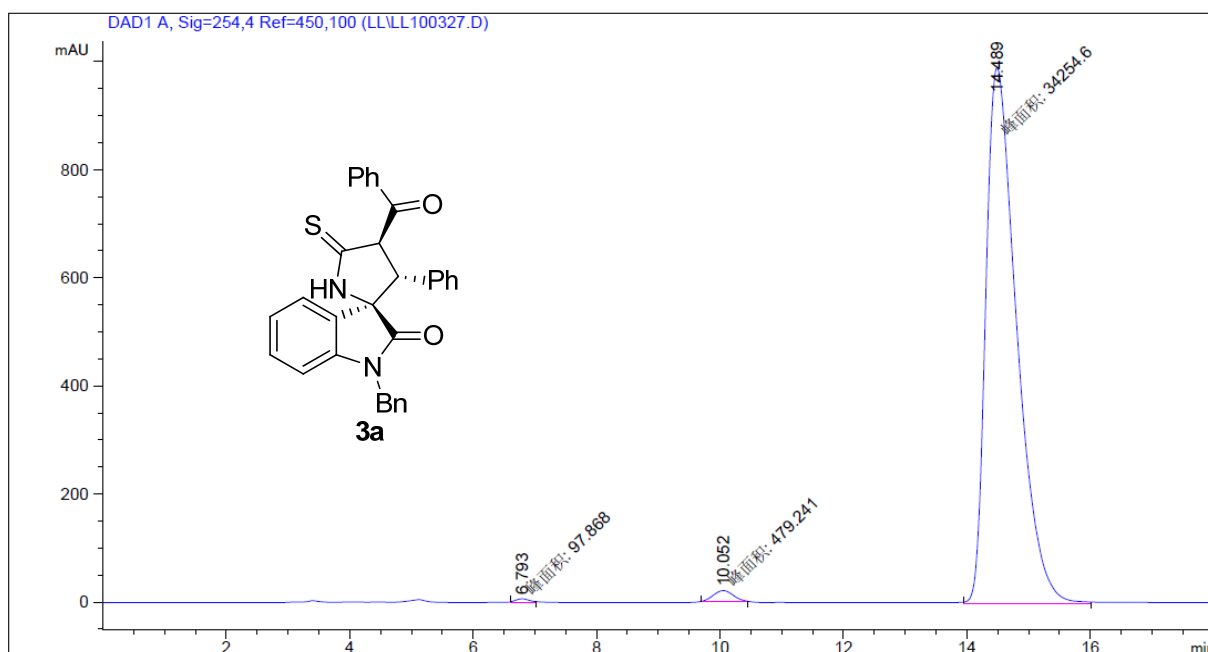

| Peak # | RetTime [min] | Type | Width [min] | Area [mAU*s] | Height [mAU] | Area %  |
|--------|---------------|------|-------------|--------------|--------------|---------|
| 1      | 6.793         | MM   | 0.2543      | 97.86803     | 6.41369      | 0.2810  |
| 2      | 10.052        | MM   | 0.3823      | 479.24118    | 20.89052     | 1.3759  |
| 3      | 14.489        | MM   | 0.5763      | 3.42546e4    | 990.62695    | 98.3432 |

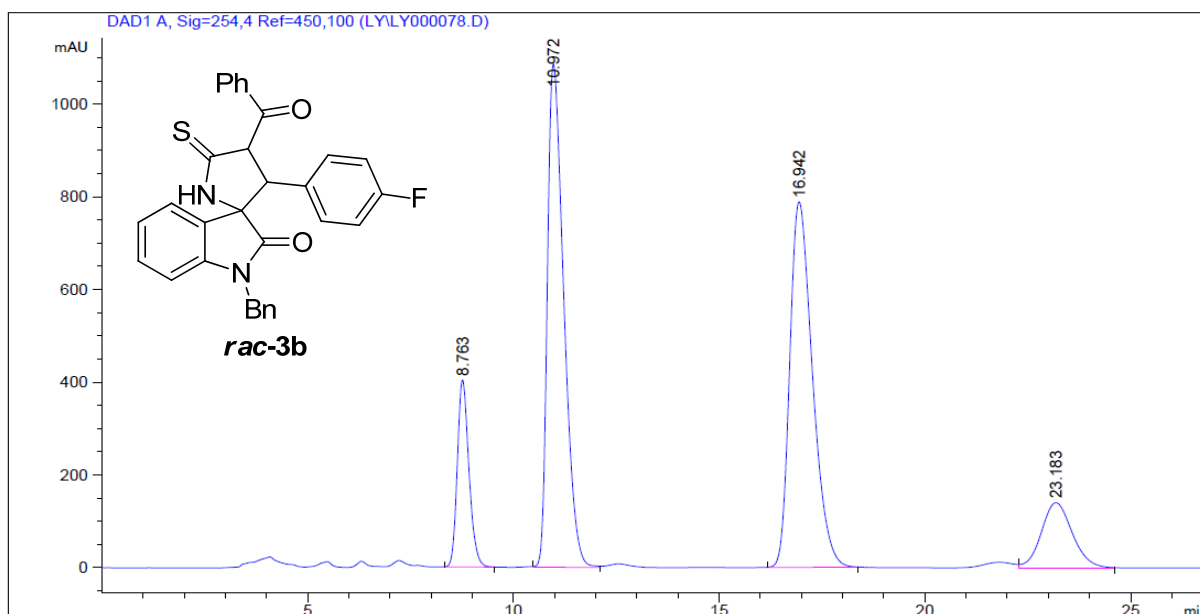

| Peak # | RetTime [min] | Type | Width [min] | Area [mAU*s] | Height [mAU] | Area %  |
|--------|---------------|------|-------------|--------------|--------------|---------|
| 1      | 8.763         | BB   | 0.2985      | 7899.39258   | 403.29086    | 10.4783 |
| 2      | 10.972        | BB   | 0.4260      | 2.99680e4    | 1085.80811   | 39.7516 |
| 3      | 16.942        | BB   | 0.5889      | 3.01943e4    | 788.23779    | 40.0517 |
| 4      | 23.183        | VB   | 0.8067      | 7326.49316   | 140.41249    | 9.7184  |

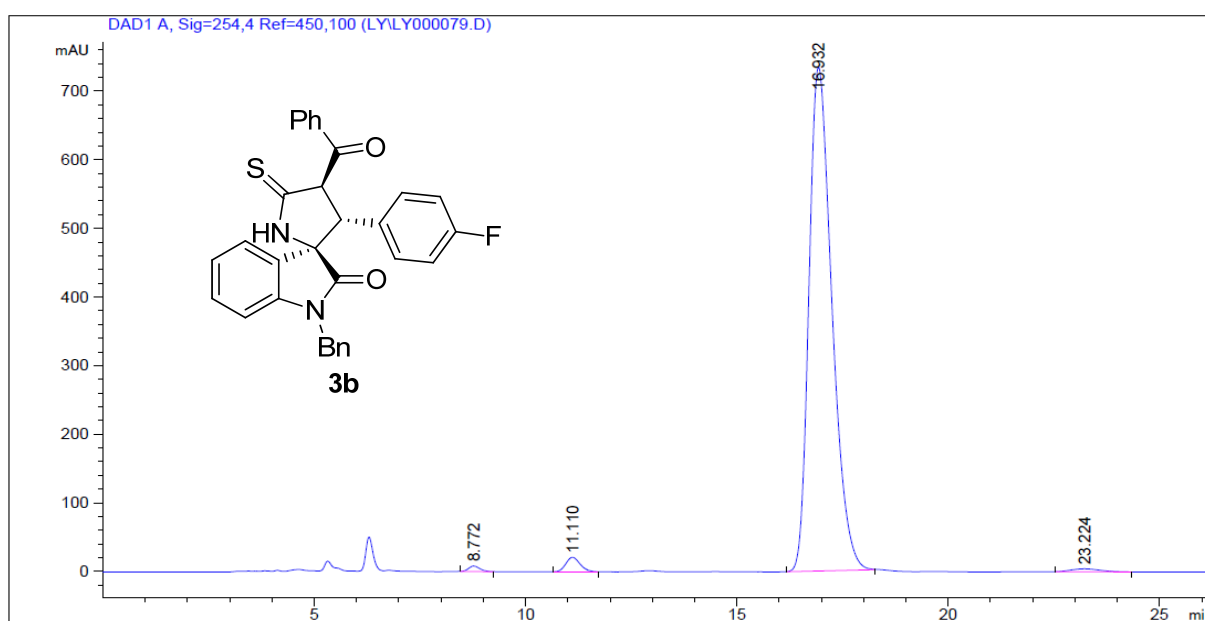

| Peak # | RetTime [min] | Type | Width [min] | Area [mAU*s] | Height [mAU] | Area %  |
|--------|---------------|------|-------------|--------------|--------------|---------|
| 1      | 8.772         | BB   | 0.2815      | 156.55571    | 8.31924      | 0.5485  |
| 2      | 11.110        | BB   | 0.3620      | 496.97977    | 21.16286     | 1.7411  |
| 3      | 16.932        | BB   | 0.5798      | 2.76753e4    | 734.16034    | 96.9585 |
| 4      | 23.224        | BB   | 0.6611      | 214.60616    | 4.39970      | 0.7519  |

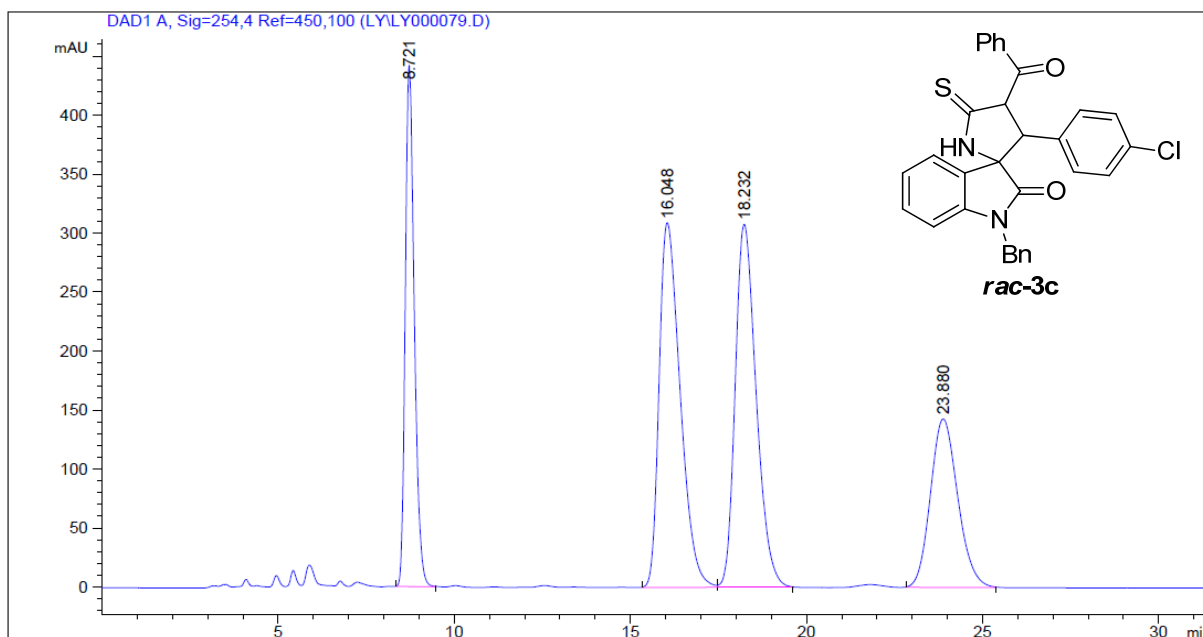

| Peak # | RetTime [min] | Type | Width [min] | Area [mAU*s] | Height [mAU] | Area %  |
|--------|---------------|------|-------------|--------------|--------------|---------|
| 1      | 8.721         | BB   | 0.2740      | 7878.34717   | 441.92758    | 19.1407 |
| 2      | 16.048        | BB   | 0.6402      | 1.28331e4    | 309.18350    | 31.1784 |
| 3      | 18.232        | BB   | 0.6372      | 1.27518e4    | 307.87482    | 30.9809 |
| 4      | 23.880        | BB   | 0.8229      | 7696.93994   | 142.79037    | 18.7000 |

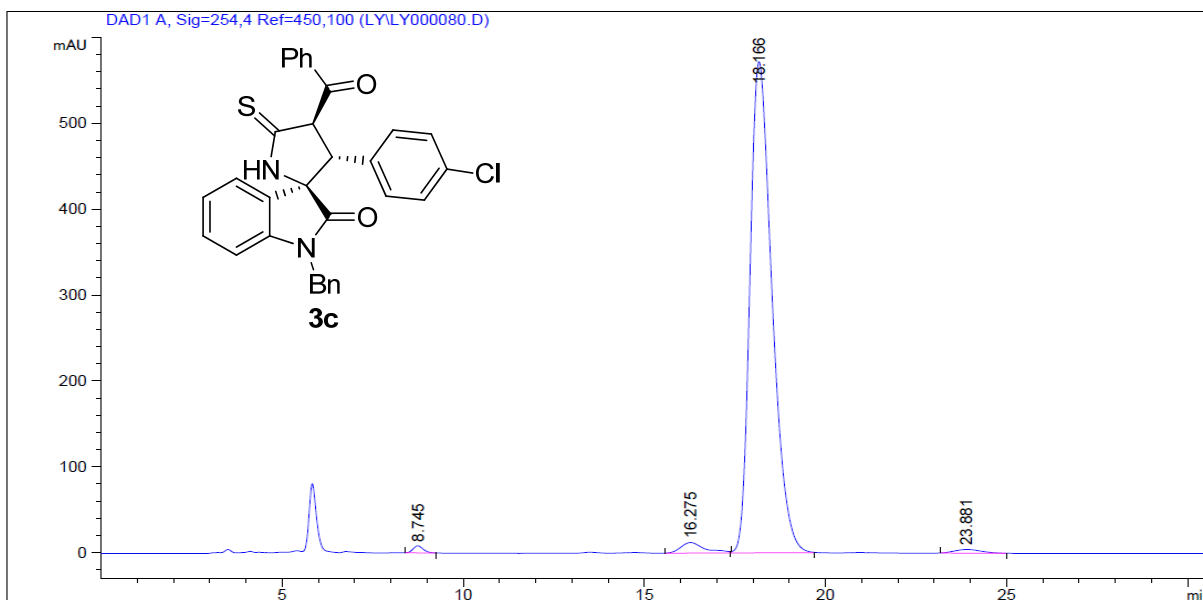

| Peak # | RetTime [min] | Type | Width [min] | Area [mAU*s] | Height [mAU] | Area %  |
|--------|---------------|------|-------------|--------------|--------------|---------|
| 1      | 8.745         | BB   | 0.2970      | 158.74976    | 8.23021      | 0.6338  |
| 2      | 16.275        | BB   | 0.6489      | 563.44012    | 12.28817     | 2.2496  |
| 3      | 18.166        | BB   | 0.6496      | 2.41026e4    | 571.95203    | 96.2314 |
| 4      | 23.881        | BB   | 0.6122      | 221.71156    | 4.30996      | 0.8852  |



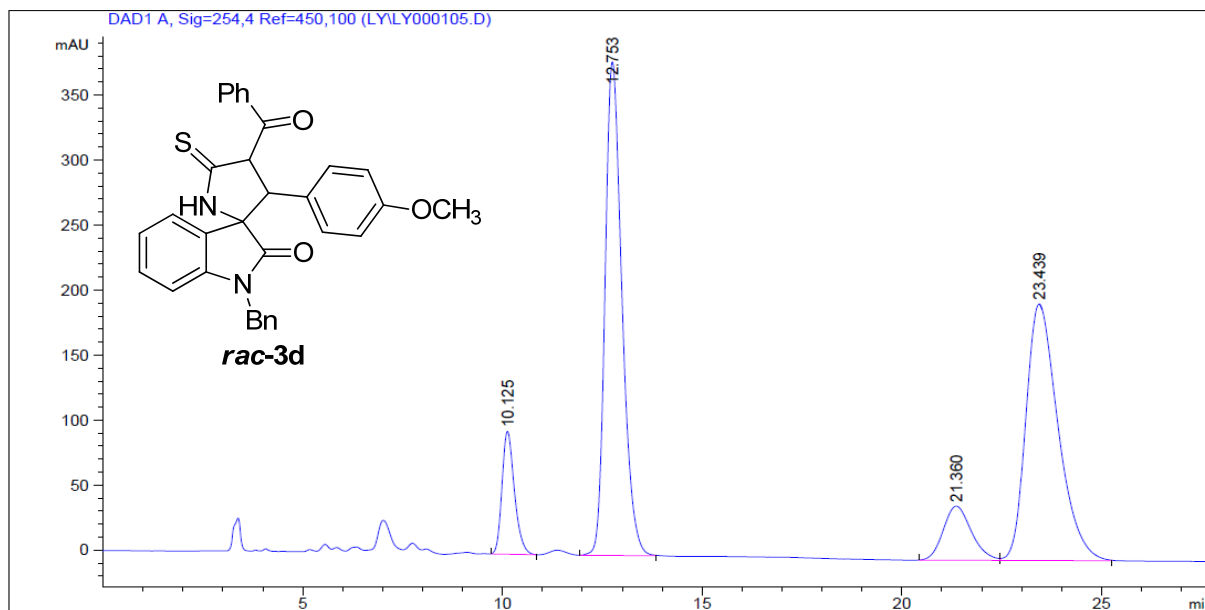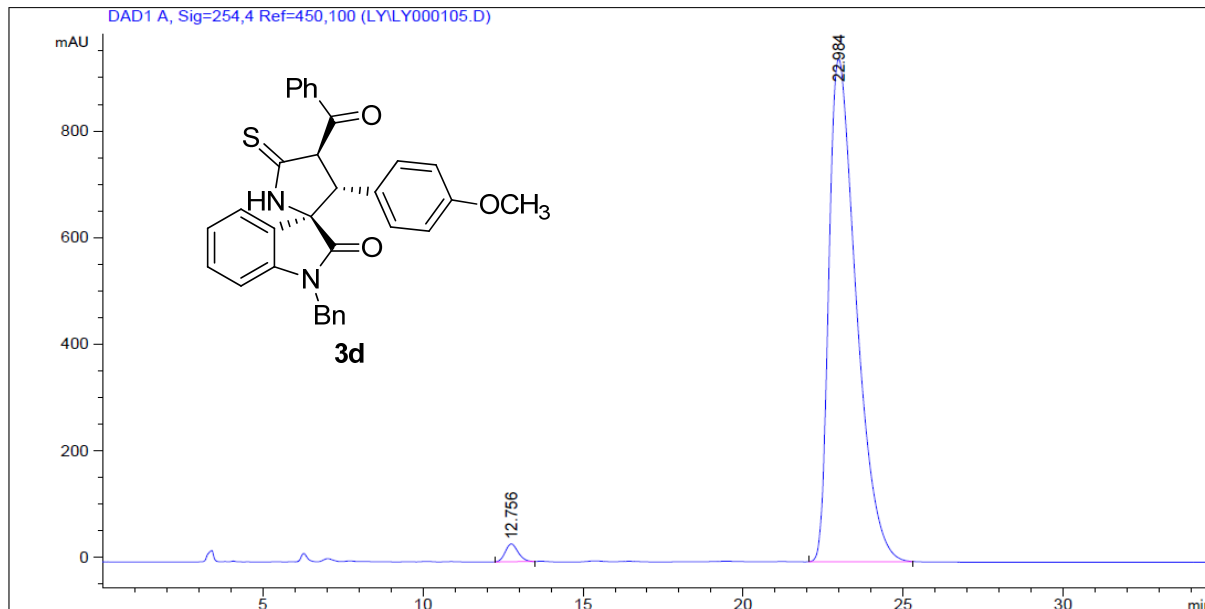

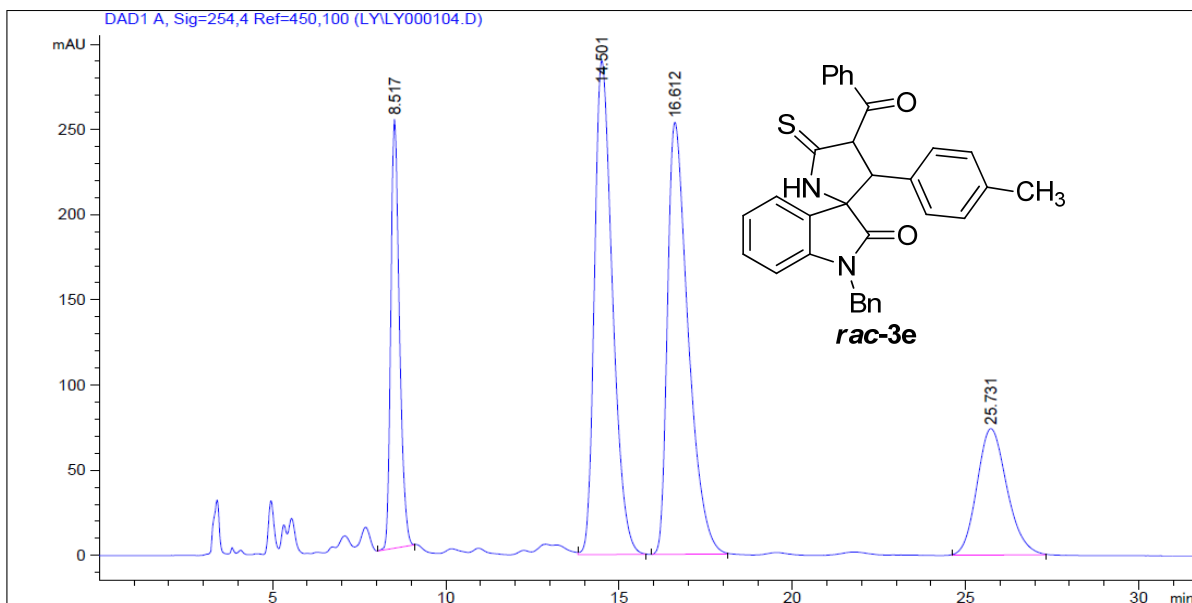

| Peak # | RetTime [min] | Type | Width [min] | Area [mAU*s] | Height [mAU] | Area %  |
|--------|---------------|------|-------------|--------------|--------------|---------|
| 1      | 8.517         | VB   | 0.2651      | 4382.94629   | 251.72005    | 14.6728 |
| 2      | 14.501        | VB   | 0.5564      | 1.04897e4    | 289.73096    | 35.1165 |
| 3      | 16.612        | BB   | 0.6247      | 1.05322e4    | 253.49046    | 35.2586 |
| 4      | 25.731        | BB   | 0.9042      | 4466.40332   | 74.21075     | 14.9522 |

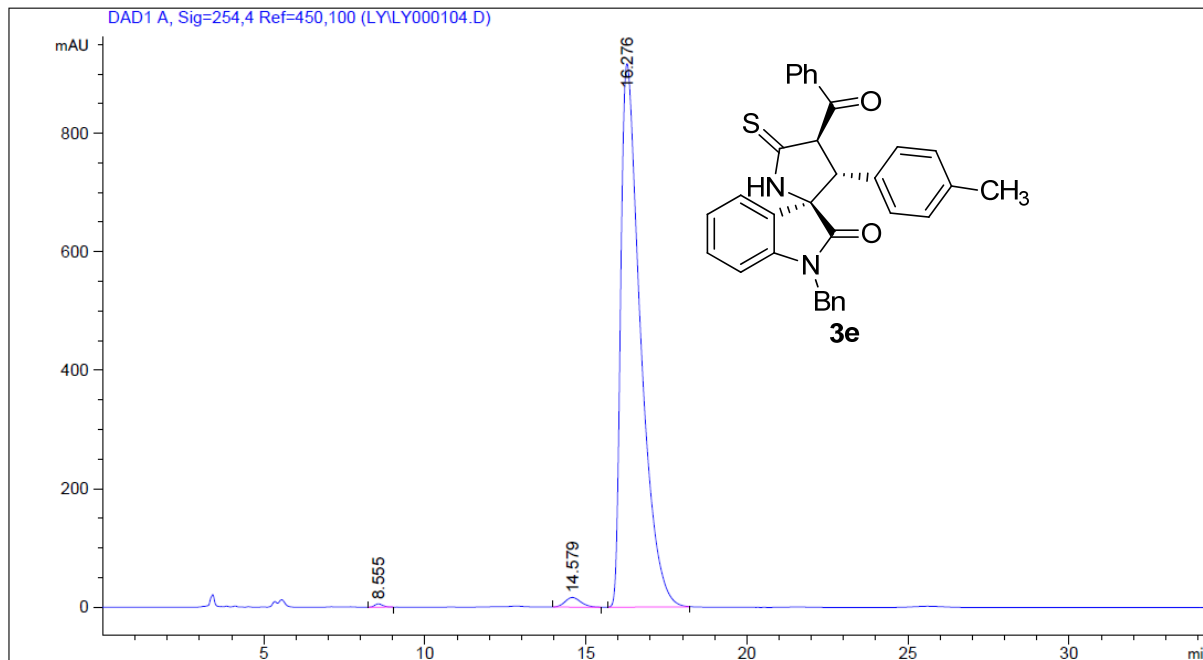

| Peak # | RetTime [min] | Type | Width [min] | Area [mAU*s] | Height [mAU] | Area %  |
|--------|---------------|------|-------------|--------------|--------------|---------|
| 1      | 8.555         | BB   | 0.2667      | 96.81110     | 5.57150      | 0.2430  |
| 2      | 14.579        | BB   | 0.5062      | 554.60559    | 16.33052     | 1.3920  |
| 3      | 16.276        | BB   | 0.6362      | 3.91914e4    | 917.70544    | 98.3650 |

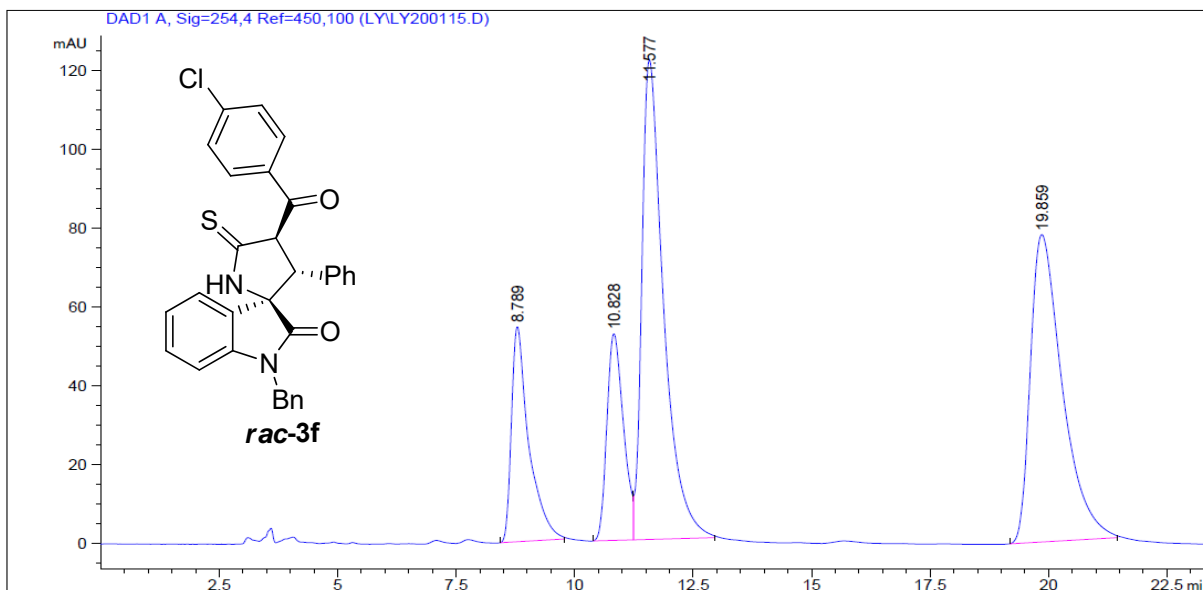

| Peak # | RetTime [min] | Type | Width [min] | Area [mAU*s] | Height [mAU] | Area %  |
|--------|---------------|------|-------------|--------------|--------------|---------|
| 1      | 8.789         | BB   | 0.3670      | 1388.75916   | 54.55343     | 13.6241 |
| 2      | 10.828        | BV   | 0.3680      | 1276.39209   | 52.42789     | 12.5217 |
| 3      | 11.577        | VB   | 0.4762      | 3882.26562   | 121.68952    | 38.0860 |
| 4      | 19.859        | BB   | 0.7074      | 3645.99487   | 77.99178     | 35.7682 |

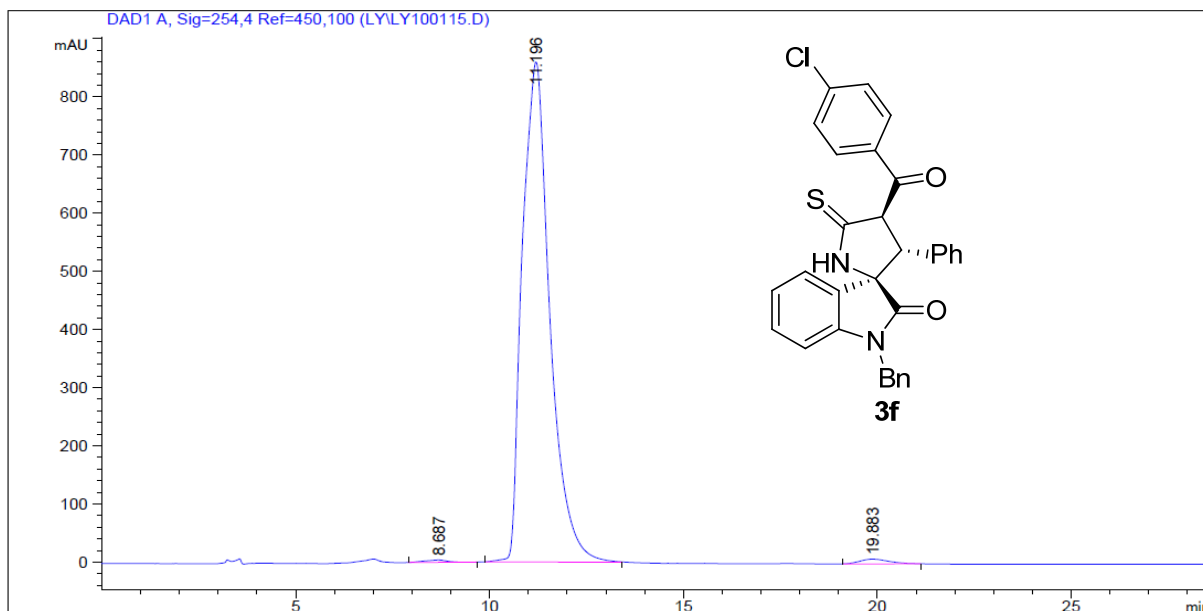

| Peak # | RetTime [min] | Type | Width [min] | Area [mAU*s] | Height [mAU] | Area %  |
|--------|---------------|------|-------------|--------------|--------------|---------|
| 1      | 8.687         | BB   | 0.5099      | 157.27686    | 4.06045      | 0.3654  |
| 2      | 11.196        | BB   | 0.6839      | 4.24546e4    | 860.08392    | 98.6447 |
| 3      | 19.883        | BB   | 0.7030      | 426.03418    | 8.13515      | 0.9899  |

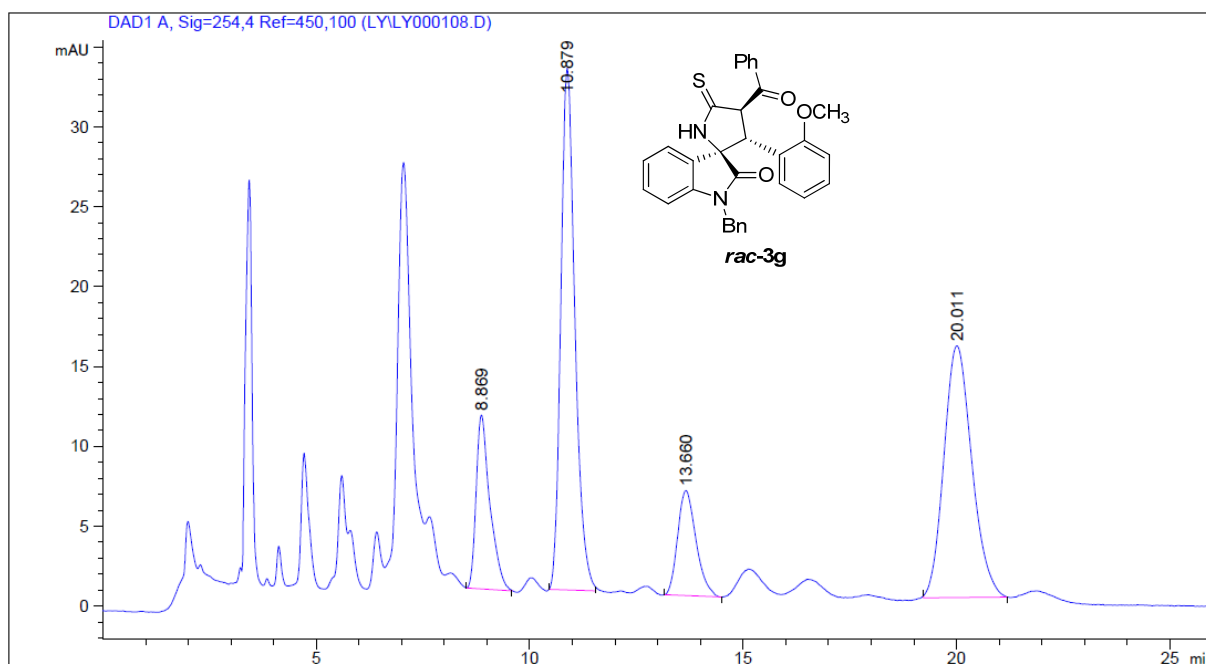

| Peak # | RetTime [min] | Type | Width [min] | Area [mAU*s] | Height [mAU] | Area %  |
|--------|---------------|------|-------------|--------------|--------------|---------|
| 1      | 8.869         | BB   | 0.3317      | 244.27101    | 10.88847     | 12.7983 |
| 2      | 10.879        | BB   | 0.3537      | 749.68329    | 32.67346     | 39.2787 |
| 3      | 13.660        | BB   | 0.4334      | 196.86566    | 6.57350      | 10.3145 |
| 4      | 20.011        | BB   | 0.6913      | 717.80347    | 15.76112     | 37.6084 |

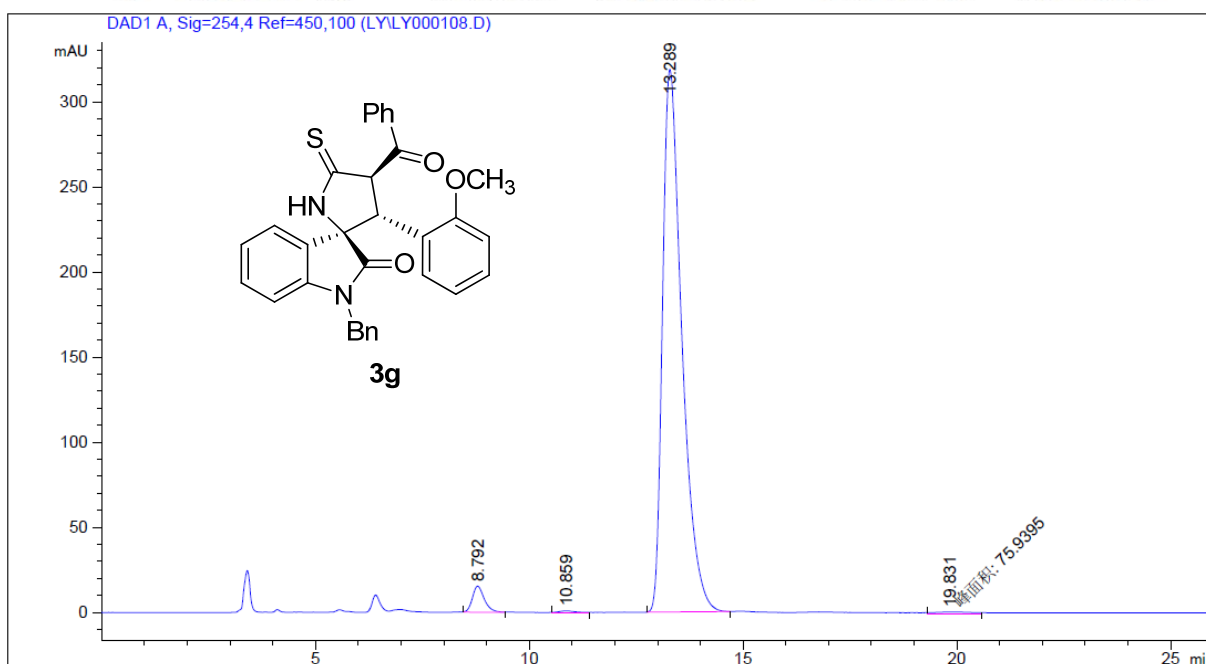

| Peak # | RetTime [min] | Type | Width [min] | Area [mAU*s] | Height [mAU] | Area %  |
|--------|---------------|------|-------------|--------------|--------------|---------|
| 1      | 8.792         | BB   | 0.2938      | 296.21640    | 15.30482     | 2.8417  |
| 2      | 10.859        | BB   | 0.3385      | 21.38058     | 9.22068e-1   | 0.2051  |
| 3      | 13.289        | BB   | 0.4750      | 1.00304e4    | 318.86804    | 96.2247 |
| 4      | 19.831        | MM   | 1.0844      | 75.93945     | 1.16717      | 0.7285  |

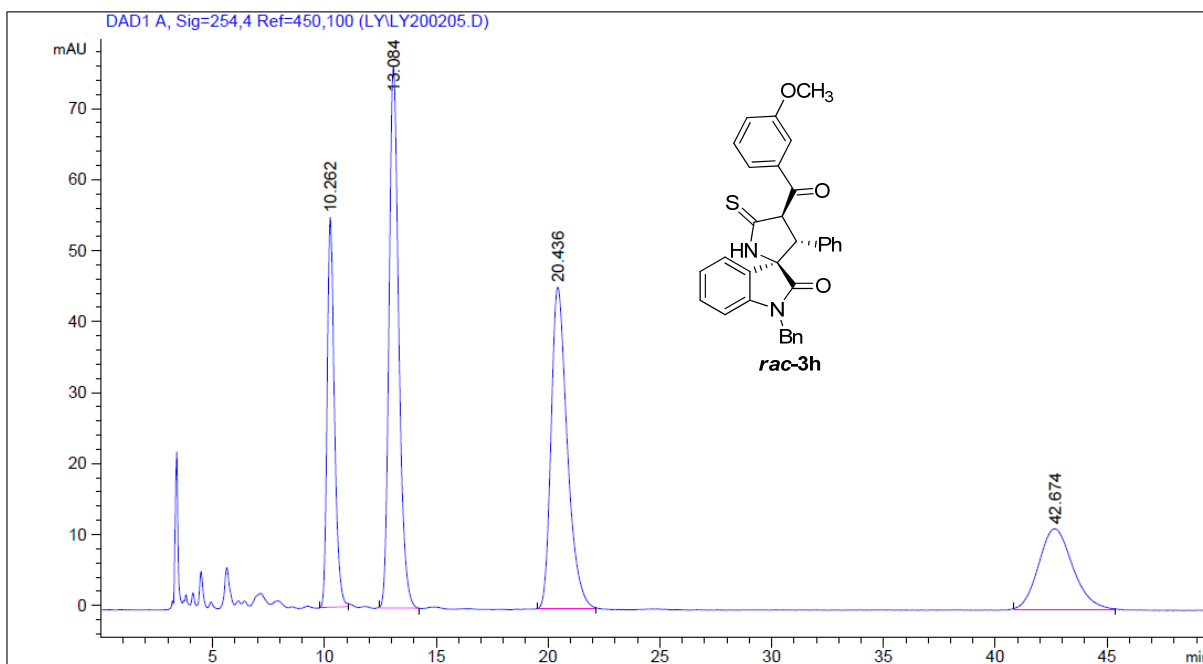

| Peak # | RetTime [min] | Type | Width [min] | Area [mAU*s] | Height [mAU] | Area %  |
|--------|---------------|------|-------------|--------------|--------------|---------|
| 1      | 10.262        | BB   | 0.3443      | 1244.44409   | 54.93481     | 17.6613 |
| 2      | 13.084        | BB   | 0.4631      | 2307.32153   | 76.23119     | 32.7458 |
| 3      | 20.436        | BB   | 0.7556      | 2283.76172   | 45.34674     | 32.4114 |
| 4      | 42.674        | BB   | 1.3088      | 1210.63501   | 11.38318     | 17.1815 |

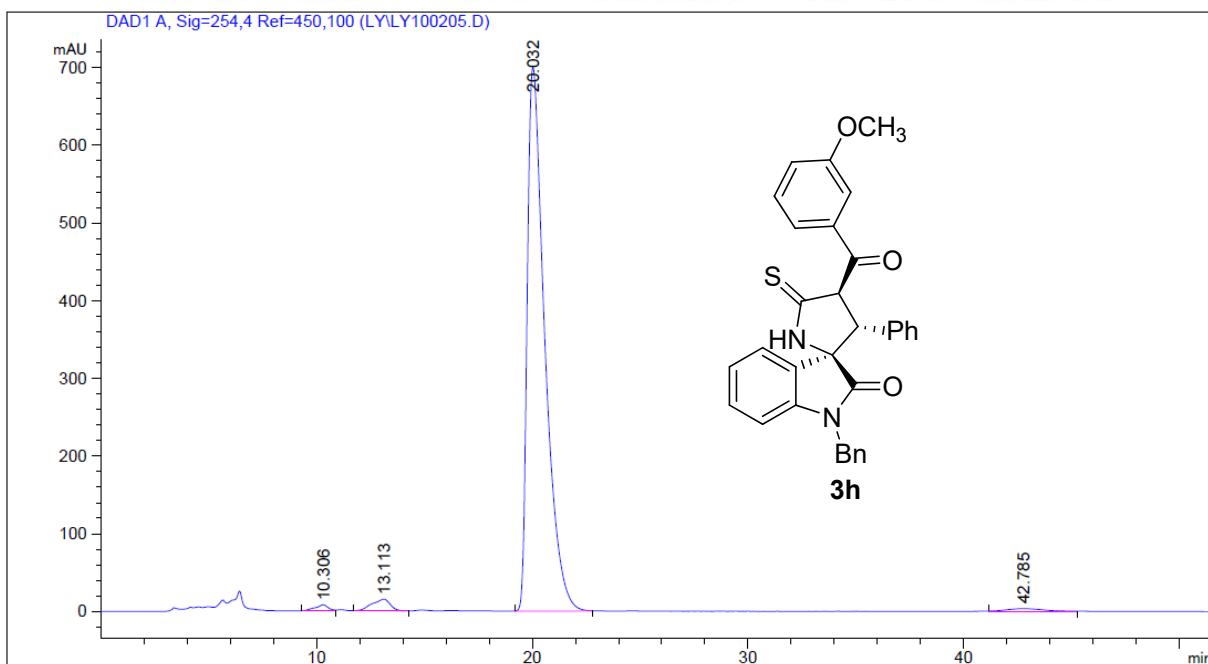

| Peak # | RetTime [min] | Type | Width [min] | Area [mAU*s] | Height [mAU] | Area %  |
|--------|---------------|------|-------------|--------------|--------------|---------|
| 1      | 10.306        | BV   | 0.5963      | 335.59744    | 7.79470      | 0.8172  |
| 2      | 13.113        | VV   | 0.8189      | 908.17761    | 15.24793     | 2.2113  |
| 3      | 20.032        | BB   | 0.8415      | 3.94465e4    | 699.97400    | 96.0495 |
| 4      | 42.785        | BB   | 1.2994      | 378.67245    | 3.44236      | 0.9220  |

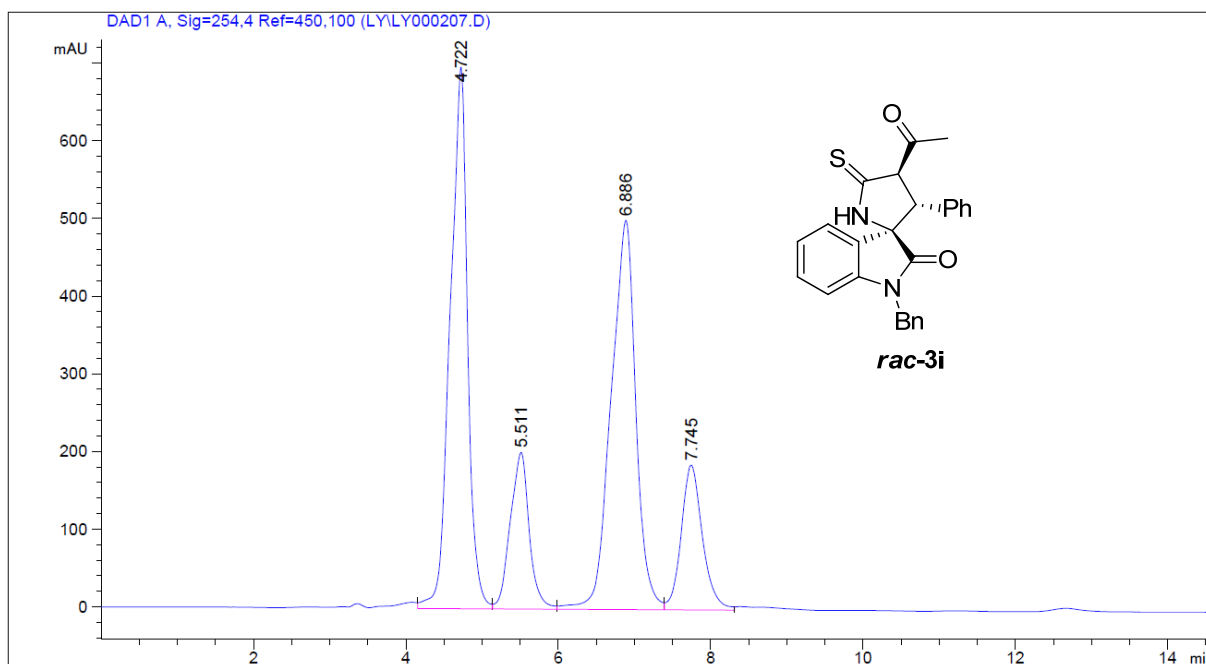

| Peak # | RetTime [min] | Type | Width [min] | Area [mAU*s] | Height [mAU] | Area %  |
|--------|---------------|------|-------------|--------------|--------------|---------|
| 1      | 4.722         | VV   | 0.2210      | 1.10631e4    | 697.75409    | 37.5039 |
| 2      | 5.511         | VV   | 0.2499      | 3490.44092   | 201.73074    | 11.8325 |
| 3      | 6.886         | VV   | 0.3195      | 1.13140e4    | 501.01068    | 38.3543 |
| 4      | 7.745         | VV   | 0.2952      | 3631.07056   | 186.44530    | 12.3093 |

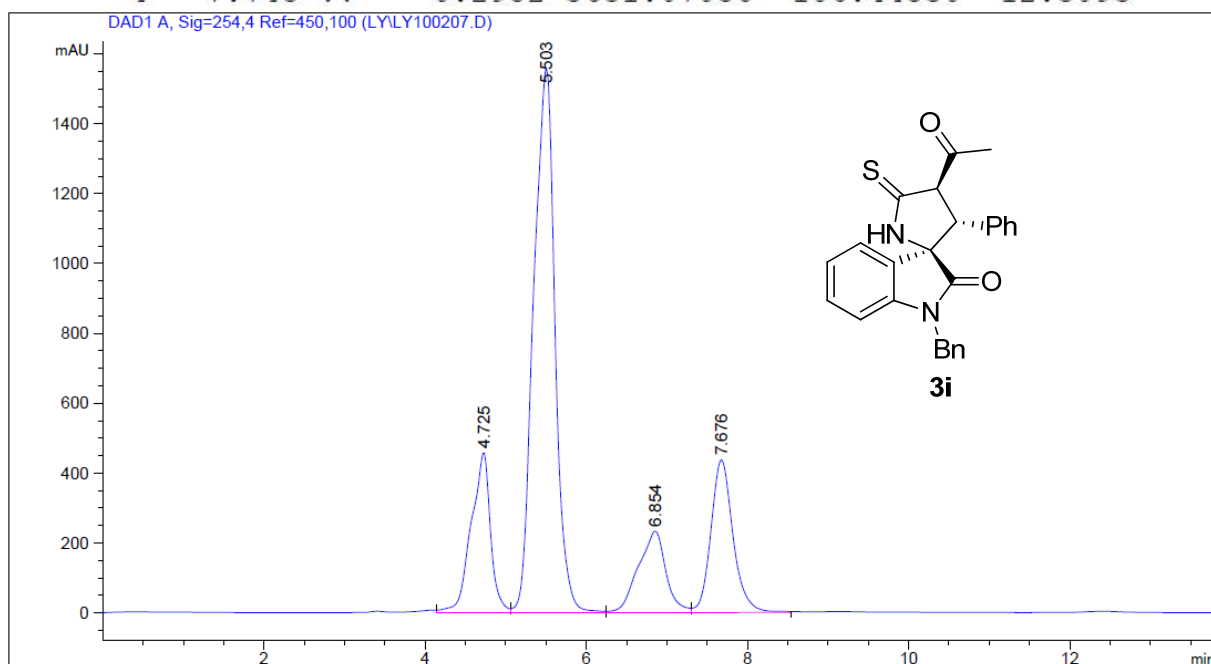

| Peak # | RetTime [min] | Type | Width [min] | Area [mAU*s] | Height [mAU] | Area %  |
|--------|---------------|------|-------------|--------------|--------------|---------|
| 1      | 4.725         | VV   | 0.2316      | 7677.59131   | 457.86414    | 15.2762 |
| 2      | 5.503         | VV   | 0.2627      | 2.86699e4    | 1558.15210   | 57.0449 |
| 3      | 6.854         | VV   | 0.3294      | 5542.05566   | 233.10382    | 11.0271 |
| 4      | 7.676         | VB   | 0.2894      | 8368.94629   | 436.98013    | 16.6518 |



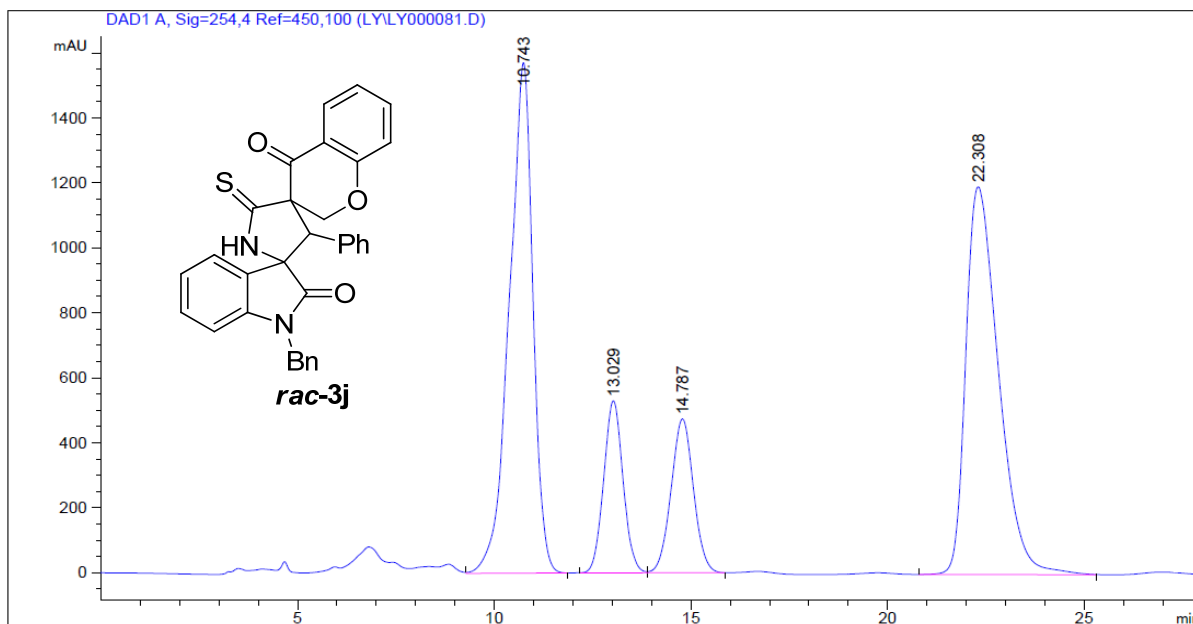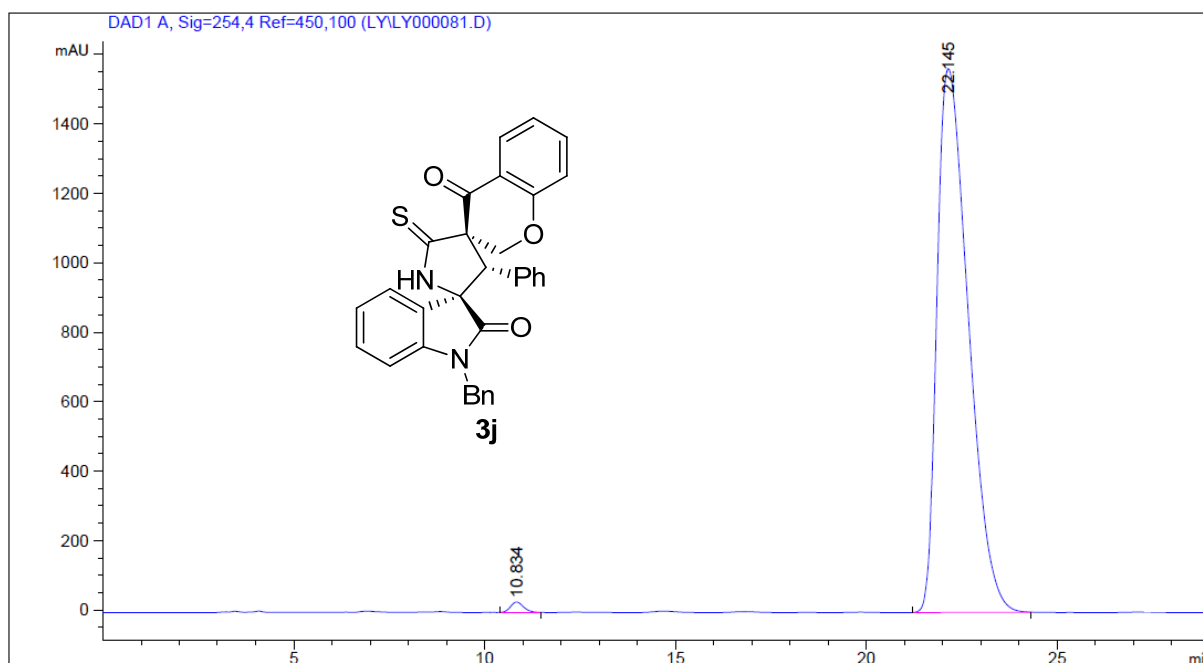

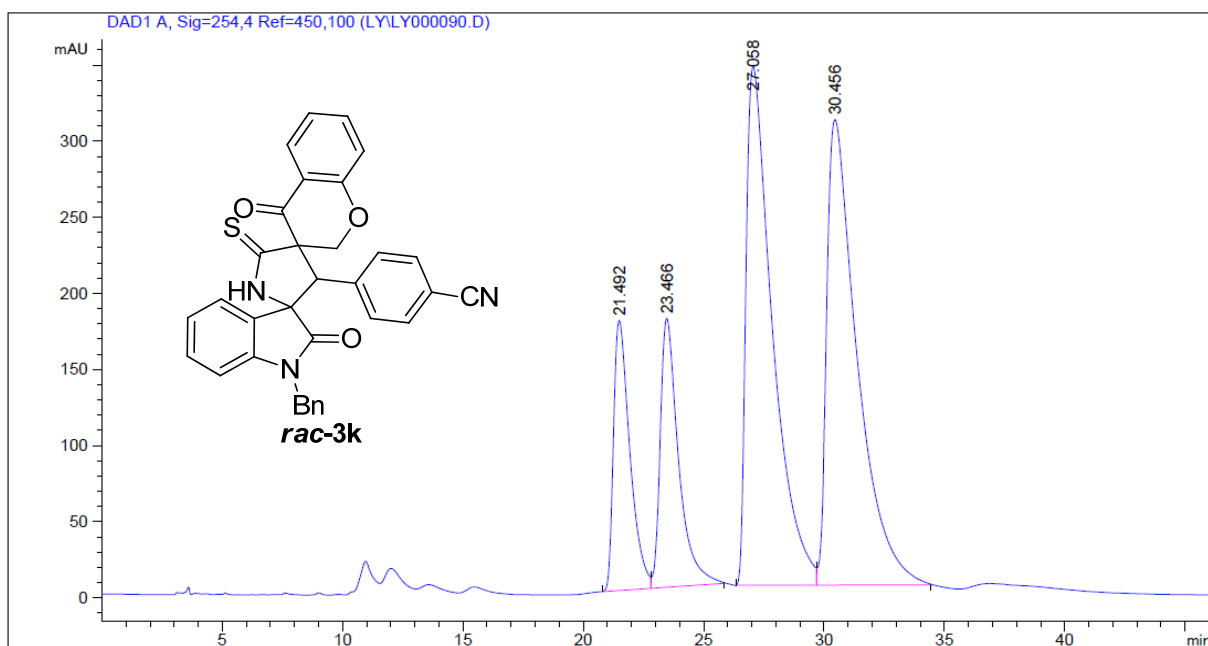

| Peak # | RetTime [min] | Type | Width [min] | Area [mAU*s] | Height [mAU] | Area %  |
|--------|---------------|------|-------------|--------------|--------------|---------|
| 1      | 21.492        | BV   | 0.7121      | 8366.10645   | 177.43916    | 11.8492 |
| 2      | 23.466        | VB   | 0.7861      | 9331.65039   | 176.69844    | 13.2168 |
| 3      | 27.058        | BV   | 1.0904      | 2.60107e4    | 340.81253    | 36.8398 |
| 4      | 30.456        | VB   | 1.2817      | 2.68963e4    | 305.91937    | 38.0942 |

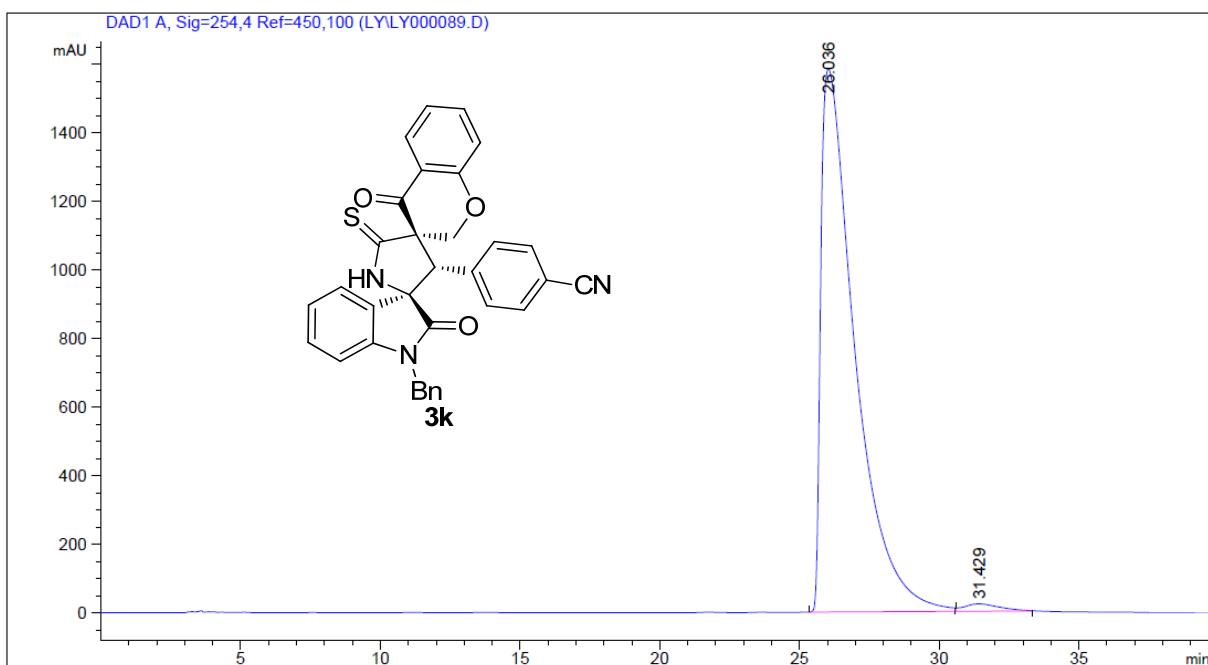

| Peak # | RetTime [min] | Type | Width [min] | Area [mAU*s] | Height [mAU] | Area %  |
|--------|---------------|------|-------------|--------------|--------------|---------|
| 1      | 26.036        | BB   | 1.2234      | 1.34075e5    | 1584.17444   | 98.6023 |
| 2      | 31.429        | BB   | 1.0551      | 1900.50269   | 21.54591     | 1.3977  |



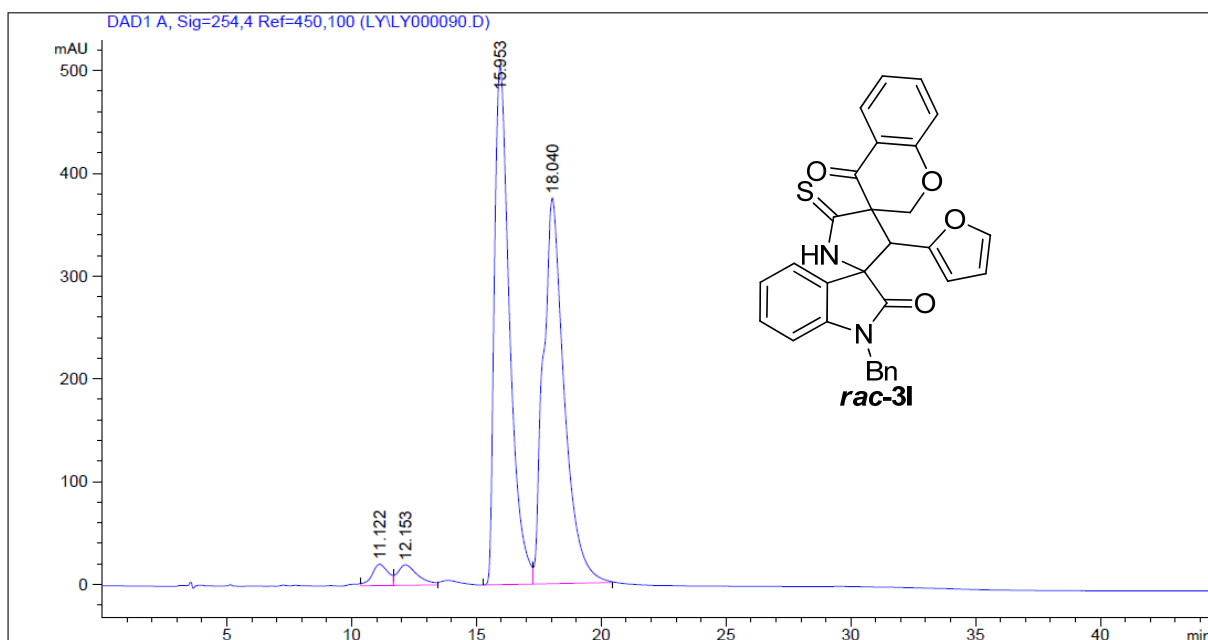

| Peak # | RetTime [min] | Type | Width [min] | Area [mAU*s] | Height [mAU] | Area %  |
|--------|---------------|------|-------------|--------------|--------------|---------|
| 1      | 11.122        | BV   | 0.6709      | 934.43201    | 20.76844     | 2.0542  |
| 2      | 12.153        | VB   | 0.7665      | 1124.55273   | 20.04609     | 2.4721  |
| 3      | 15.953        | BV   | 0.6566      | 2.14716e4    | 504.39429    | 47.2019 |
| 4      | 18.040        | VB   | 0.8144      | 2.19583e4    | 375.39554    | 48.2717 |

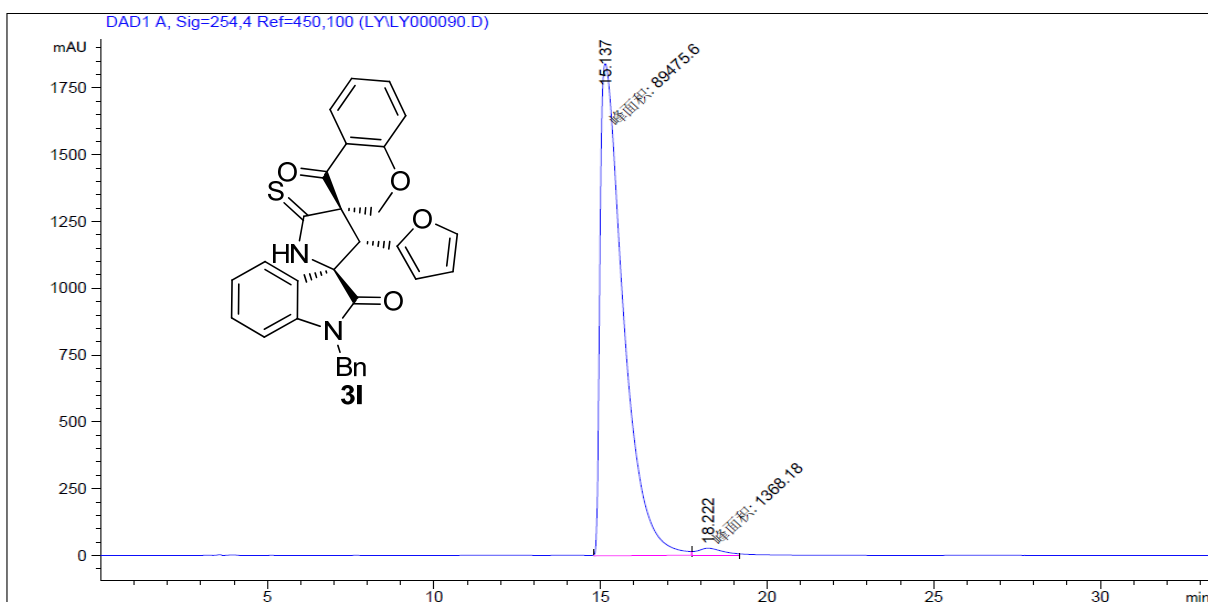

| Peak # | RetTime [min] | Type | Width [min] | Area [mAU*s] | Height [mAU] | Area %  |
|--------|---------------|------|-------------|--------------|--------------|---------|
| 1      | 15.137        | MM   | 0.8095      | 8.94756e4    | 1842.29272   | 98.4939 |
| 2      | 18.222        | MM   | 0.8816      | 1368.18262   | 25.86441     | 1.5061  |

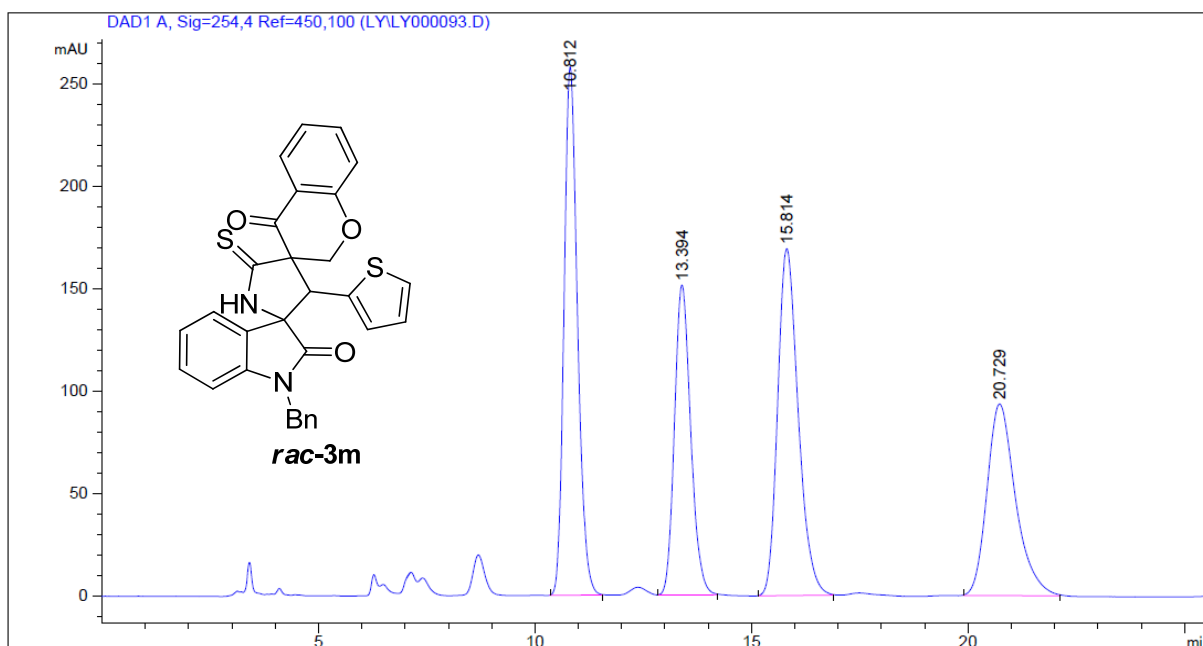

| Peak # | RetTime [min] | Type | Width [min] | Area [mAU*s] | Height [mAU] | Area %  |
|--------|---------------|------|-------------|--------------|--------------|---------|
| 1      | 10.812        | BB   | 0.3317      | 5567.63574   | 258.10785    | 28.6921 |
| 2      | 13.394        | VB   | 0.3999      | 3943.13257   | 151.38336    | 20.3205 |
| 3      | 15.814        | BB   | 0.5072      | 5595.38232   | 169.45058    | 28.8351 |
| 4      | 20.729        | BB   | 0.6899      | 4298.58789   | 93.57465     | 22.1523 |

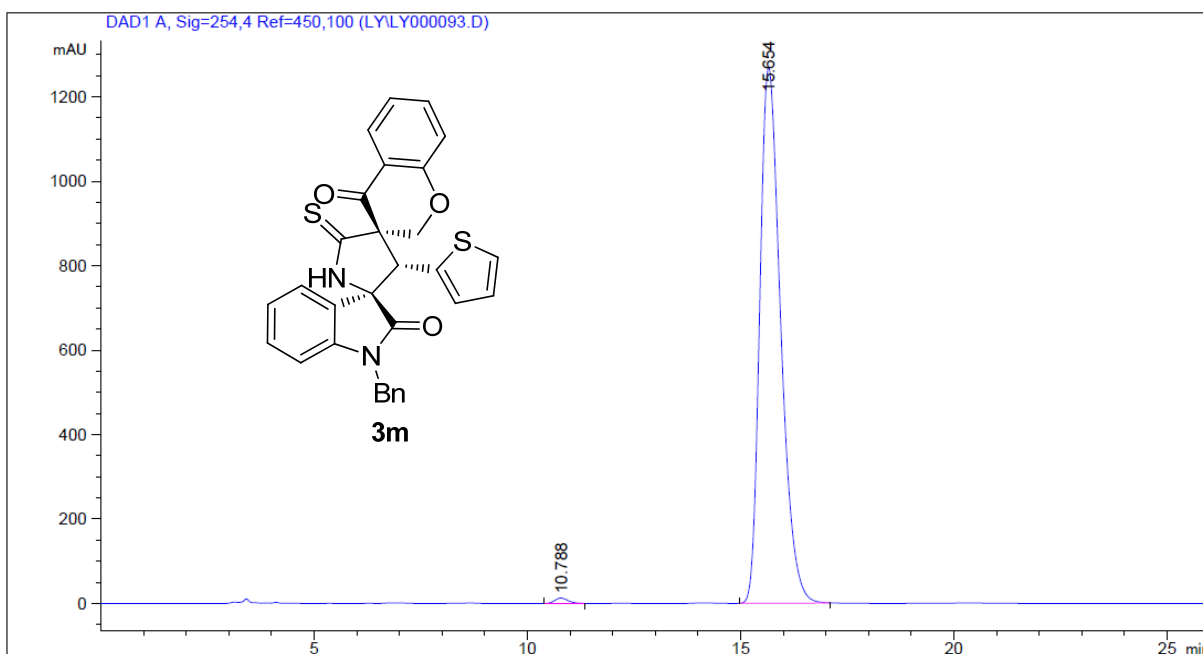

| Peak # | RetTime [min] | Type | Width [min] | Area [mAU*s] | Height [mAU] | Area %  |
|--------|---------------|------|-------------|--------------|--------------|---------|
| 1      | 10.788        | BB   | 0.3297      | 280.40192    | 12.99628     | 0.6482  |
| 2      | 15.654        | BB   | 0.5211      | 4.29771e4    | 1269.10571   | 99.3518 |

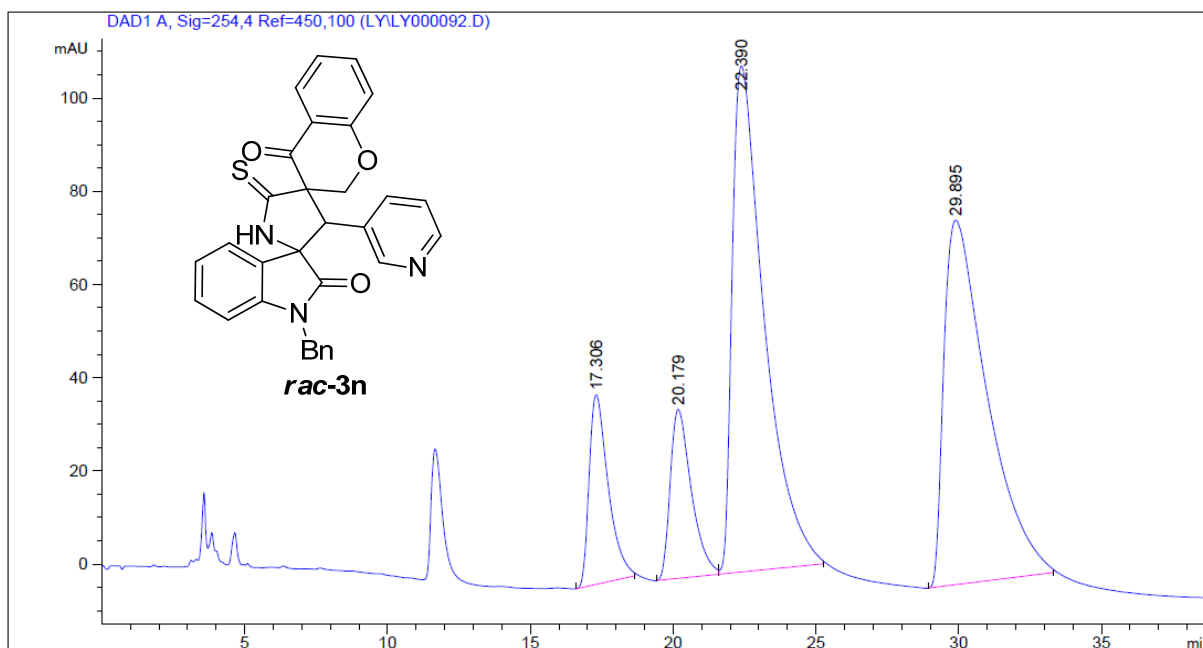

| Peak # | RetTime [min] | Type | Width [min] | Area [mAU*s] | Height [mAU] | Area %  |
|--------|---------------|------|-------------|--------------|--------------|---------|
| 1      | 17.306        | BB   | 0.6883      | 1885.87659   | 40.72181     | 9.2088  |
| 2      | 20.179        | BB   | 0.7602      | 1865.05054   | 36.25354     | 9.1071  |
| 3      | 22.390        | BB   | 1.1289      | 8496.51465   | 108.58144    | 41.4890 |
| 4      | 29.895        | BB   | 1.4633      | 8231.53223   | 78.24814     | 40.1950 |

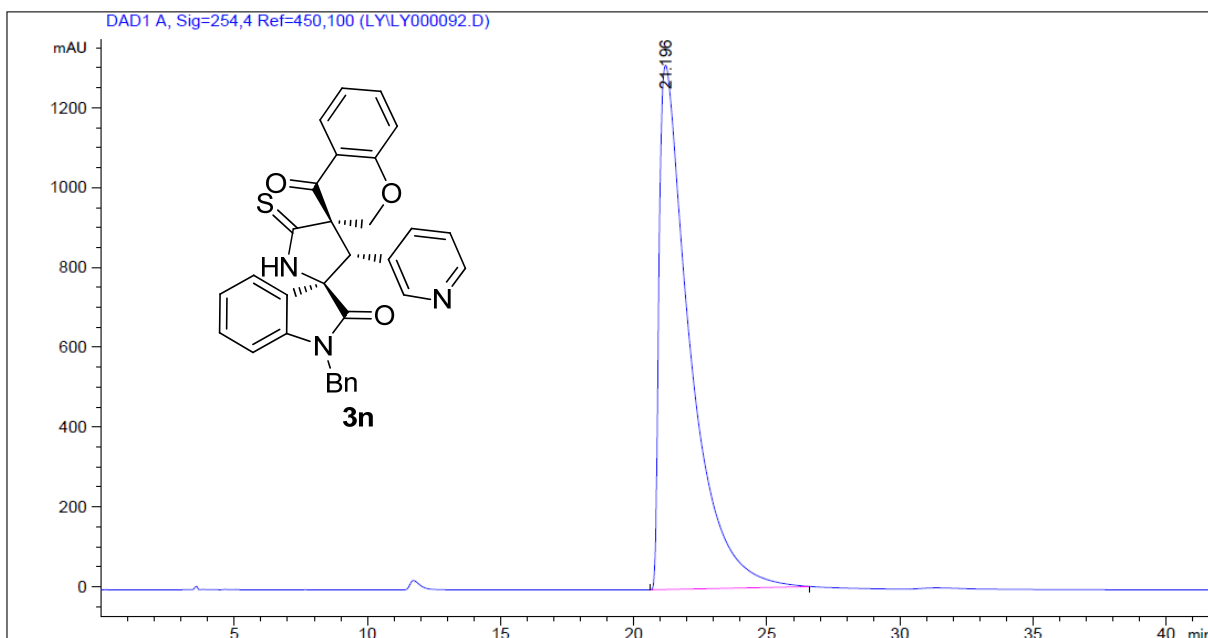

| Peak # | RetTime [min] | Type | Width [min] | Area [mAU*s] | Height [mAU] | Area %   |
|--------|---------------|------|-------------|--------------|--------------|----------|
| 1      | 21.196        | BB   | 1.1270      | 1.05472e5    | 1313.18213   | 100.0000 |

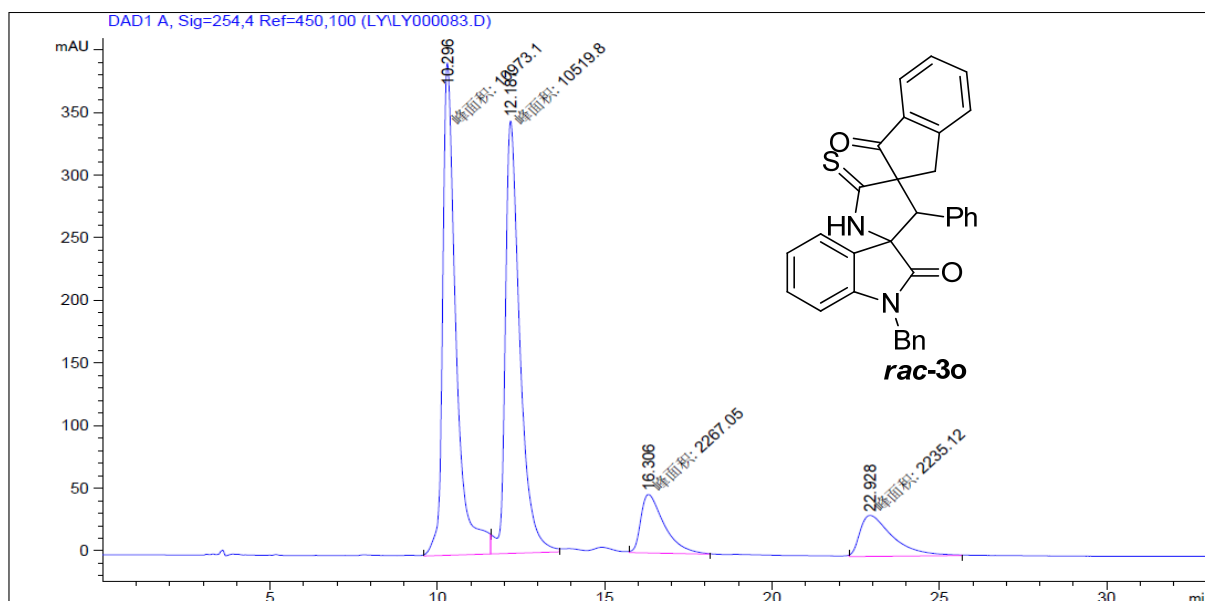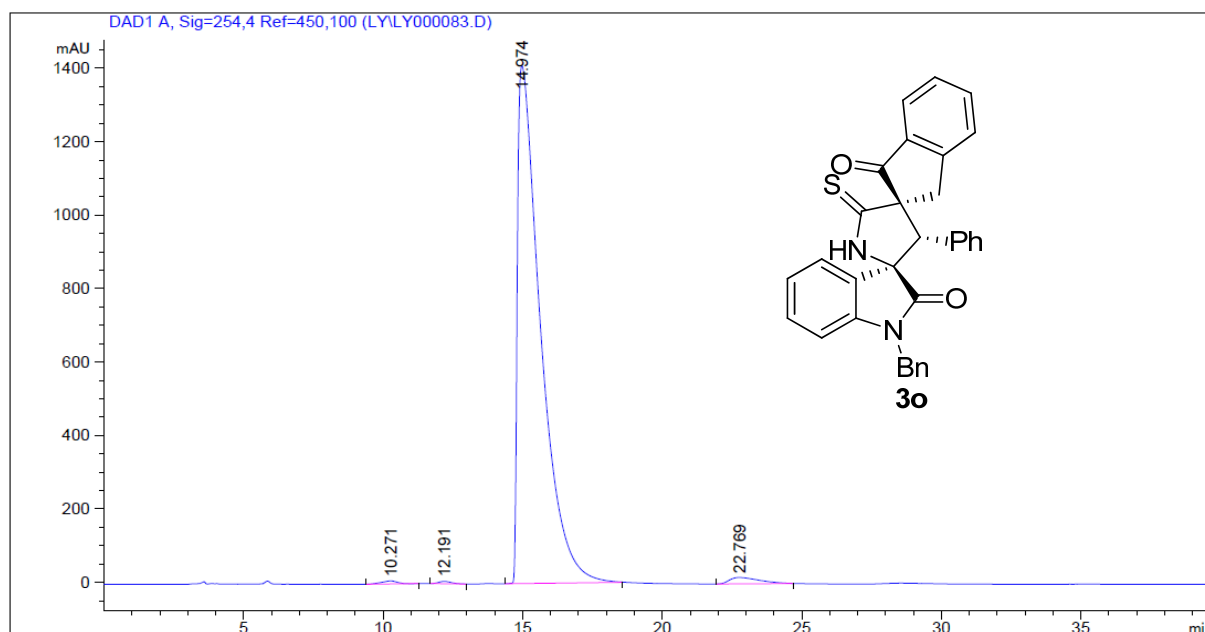

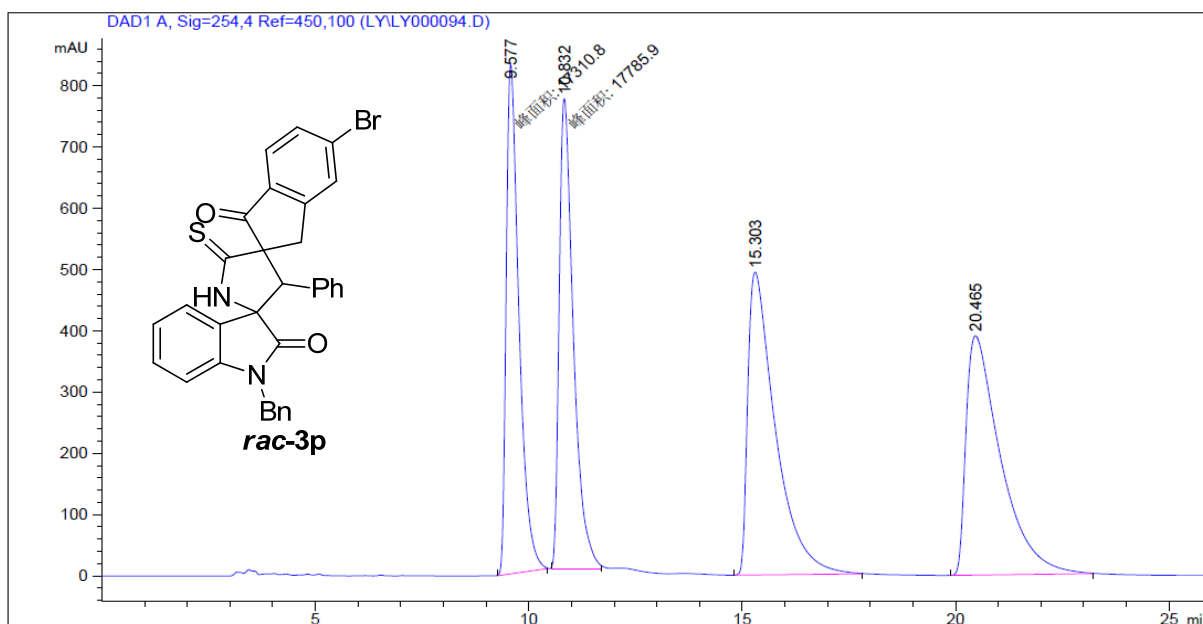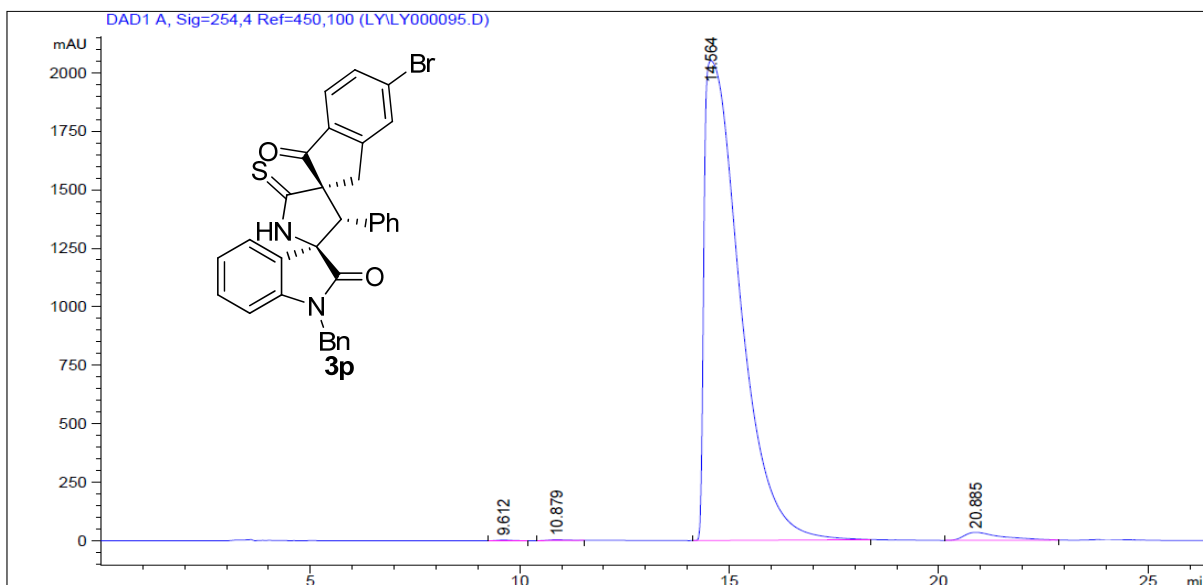

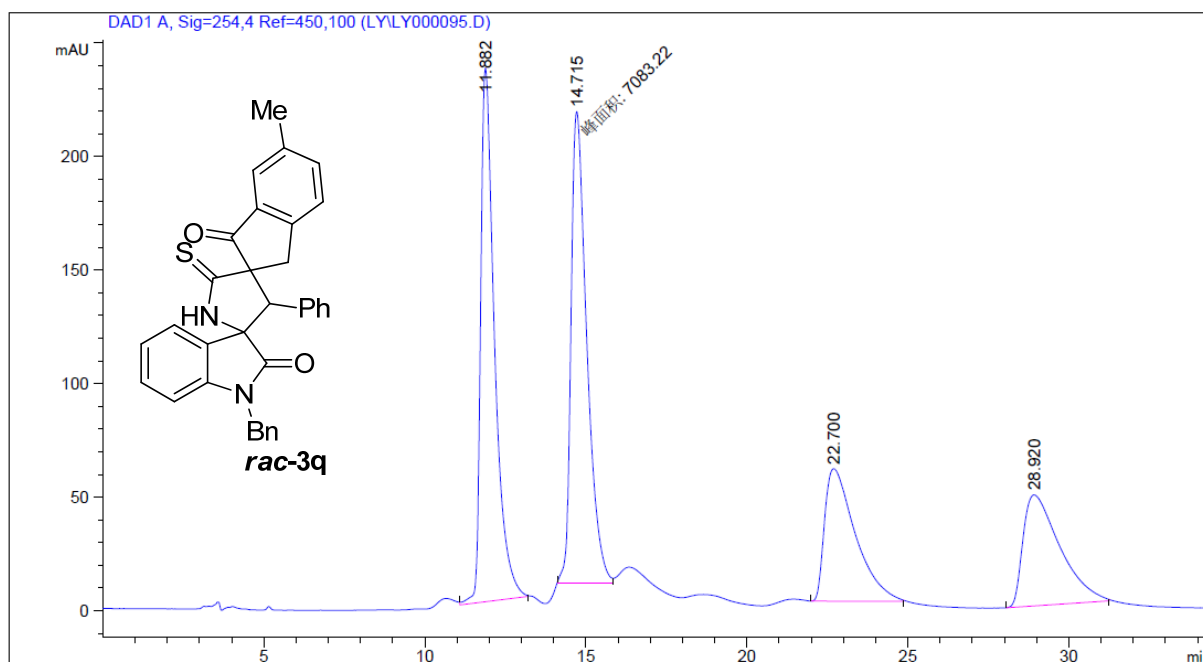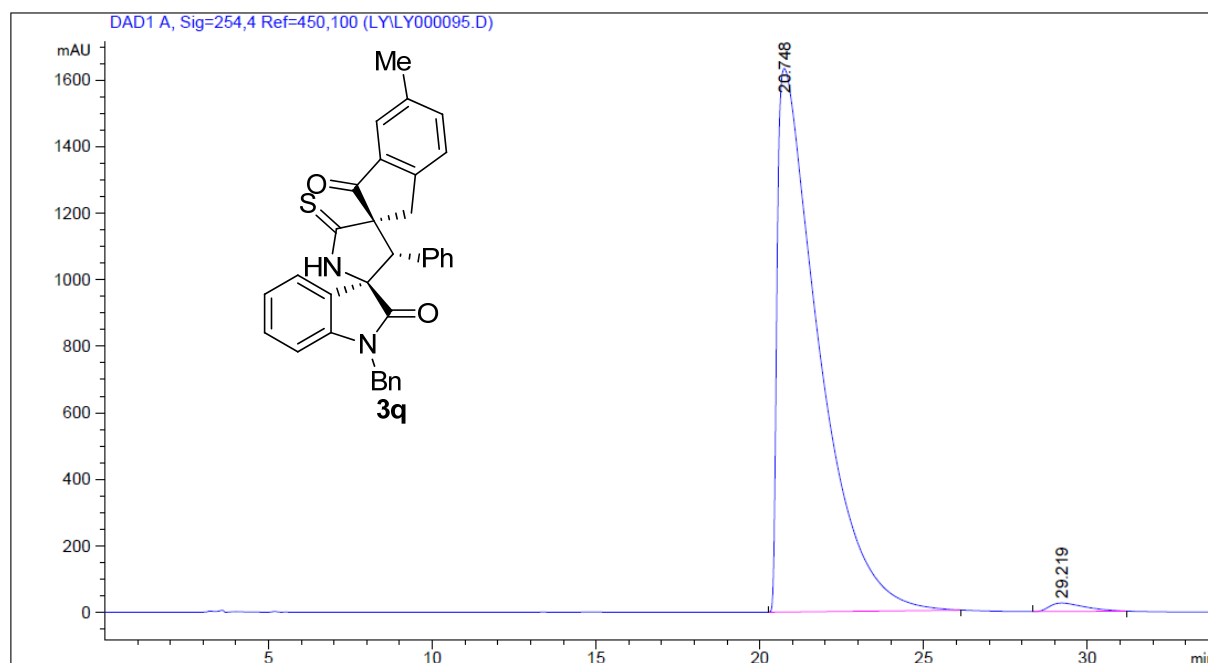



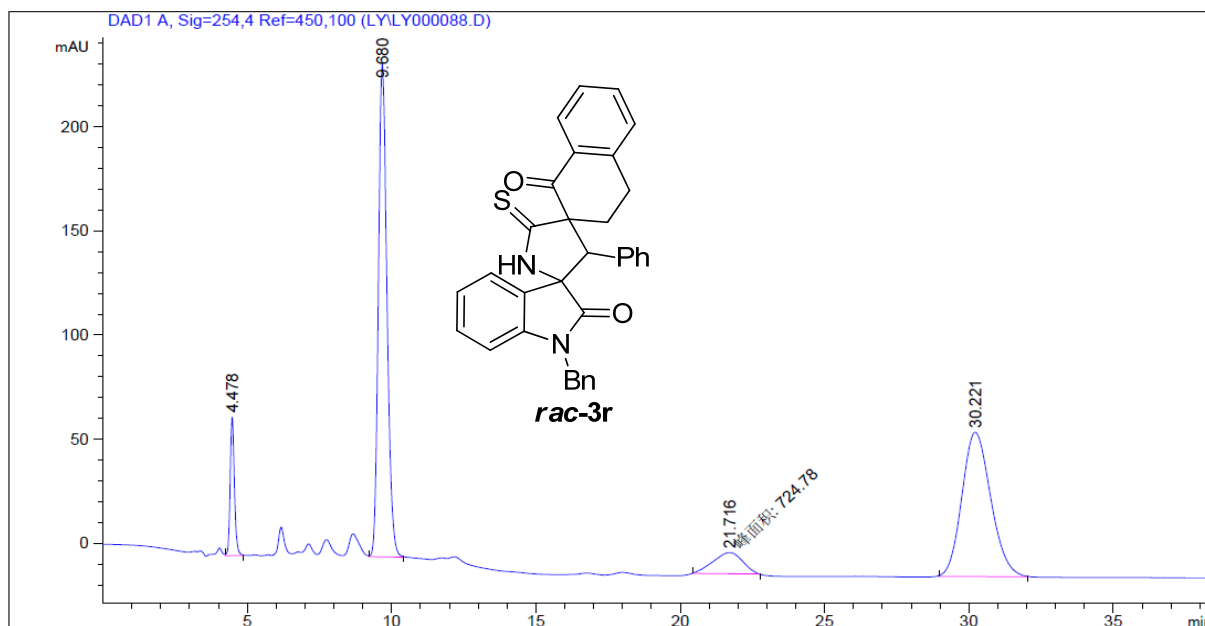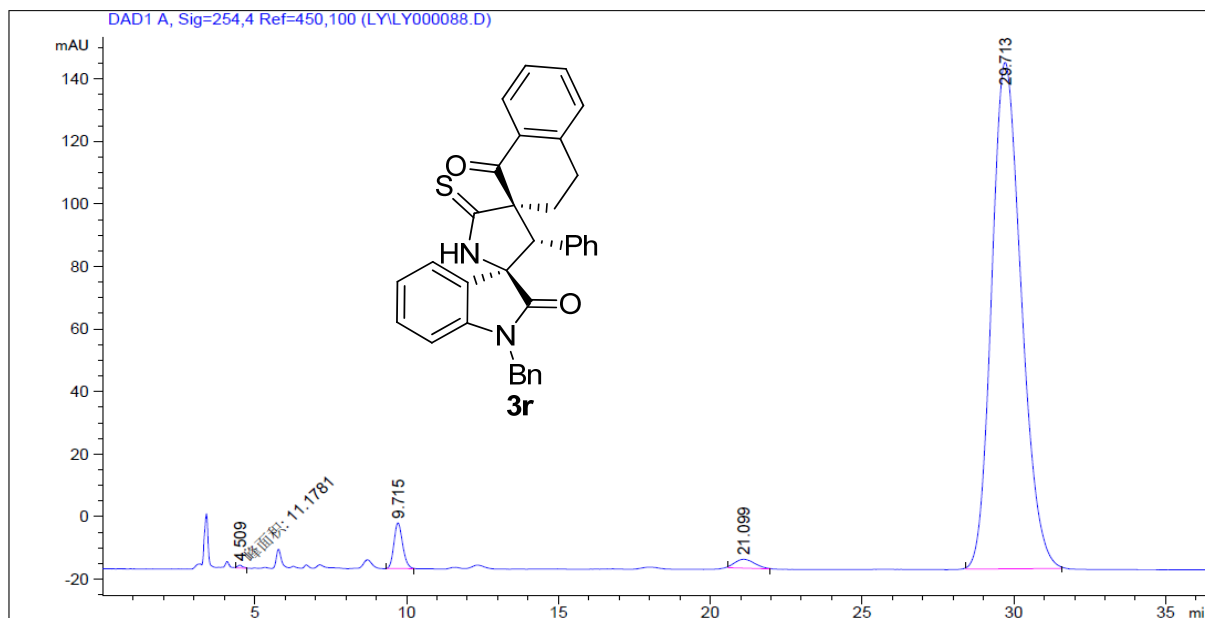

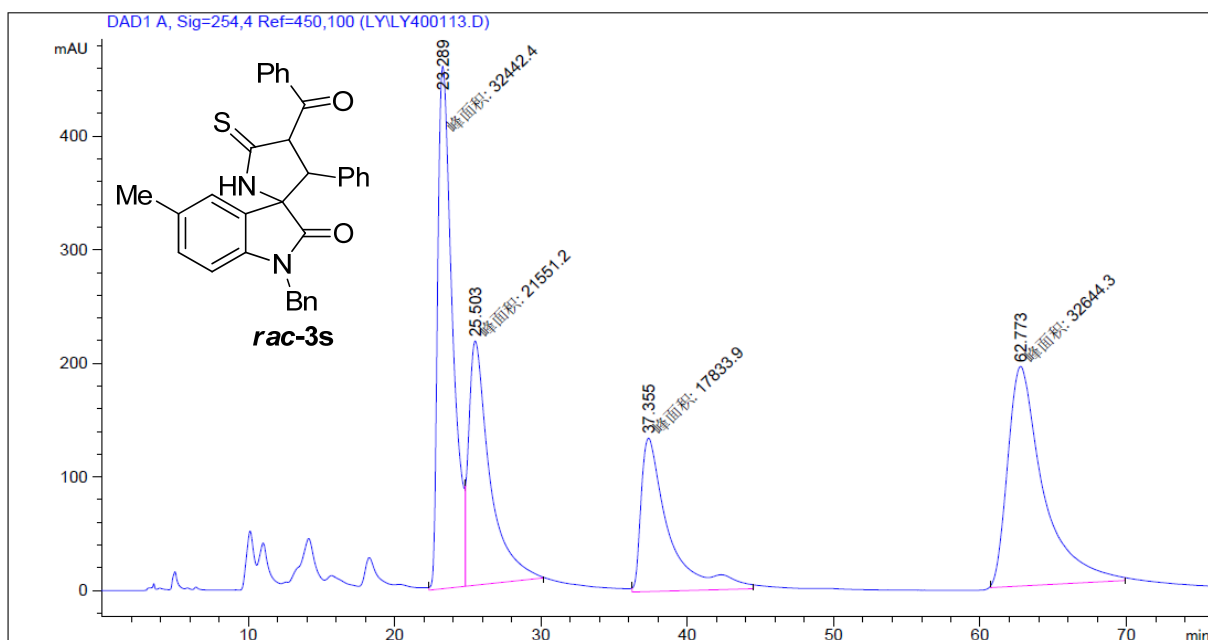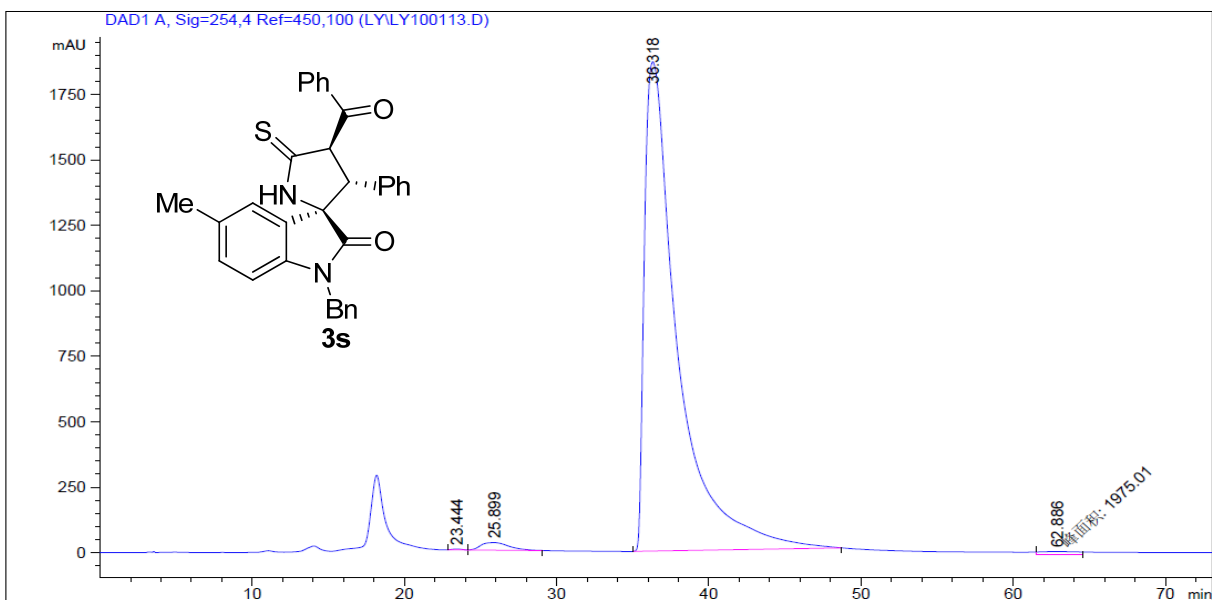



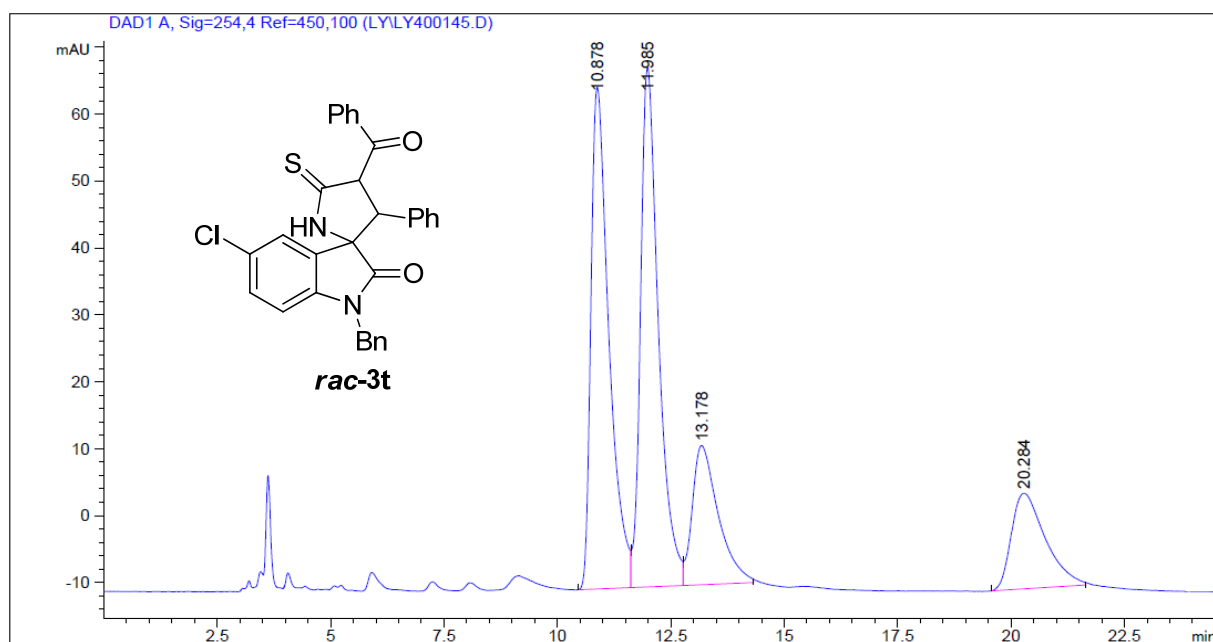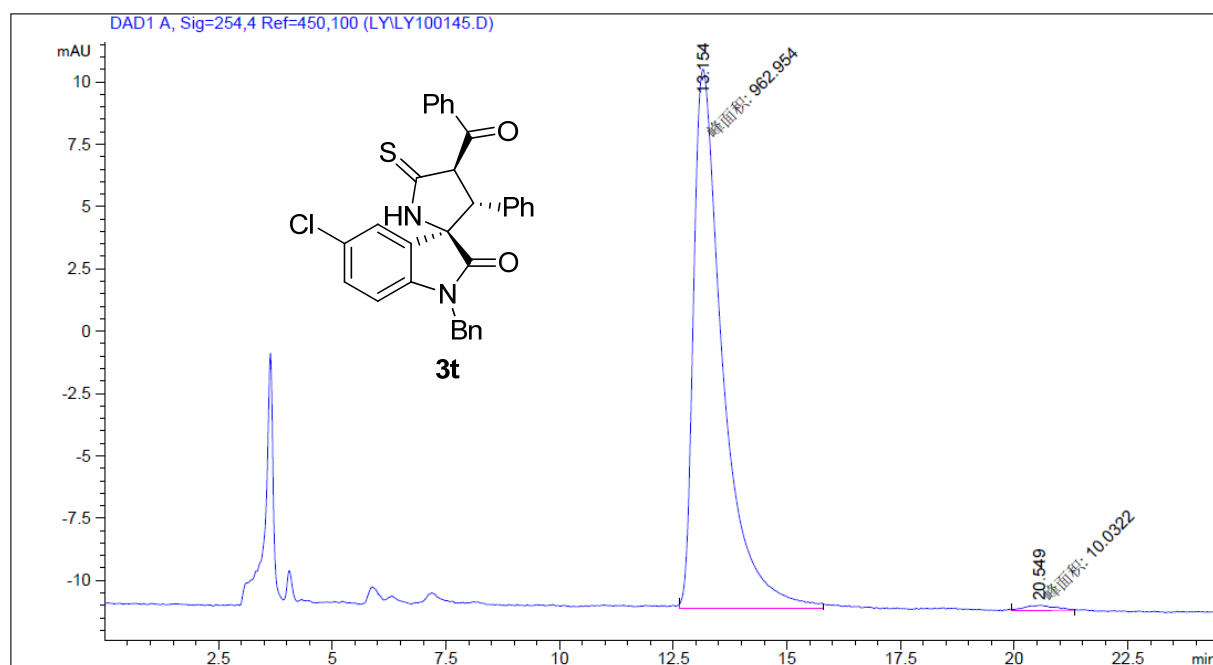

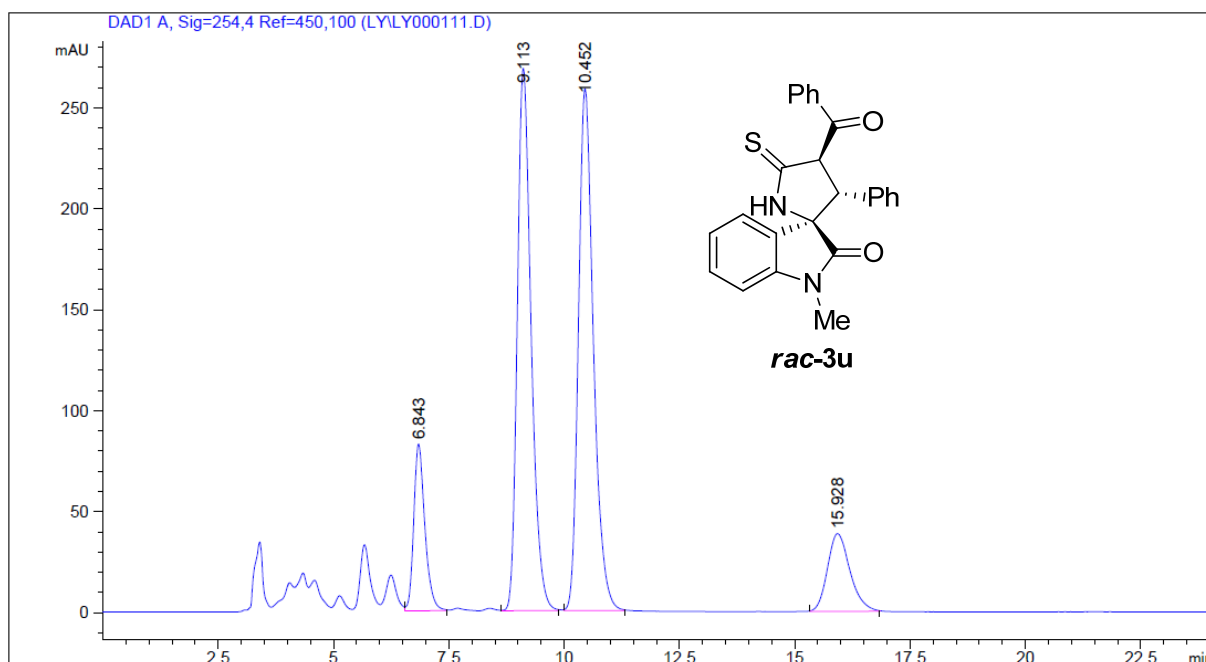

| Peak # | RetTime [min] | Type | Width [min] | Area [mAU*s] | Height [mAU] | Area %  |
|--------|---------------|------|-------------|--------------|--------------|---------|
| 1      | 6.843         | VB   | 0.2541      | 1389.67102   | 82.67780     | 9.8474  |
| 2      | 9.113         | VB   | 0.3163      | 5581.18701   | 268.72287    | 39.5492 |
| 3      | 10.452        | BB   | 0.3433      | 5835.81250   | 258.60776    | 41.3535 |
| 4      | 15.928        | BB   | 0.5150      | 1305.33667   | 38.55472     | 9.2498  |

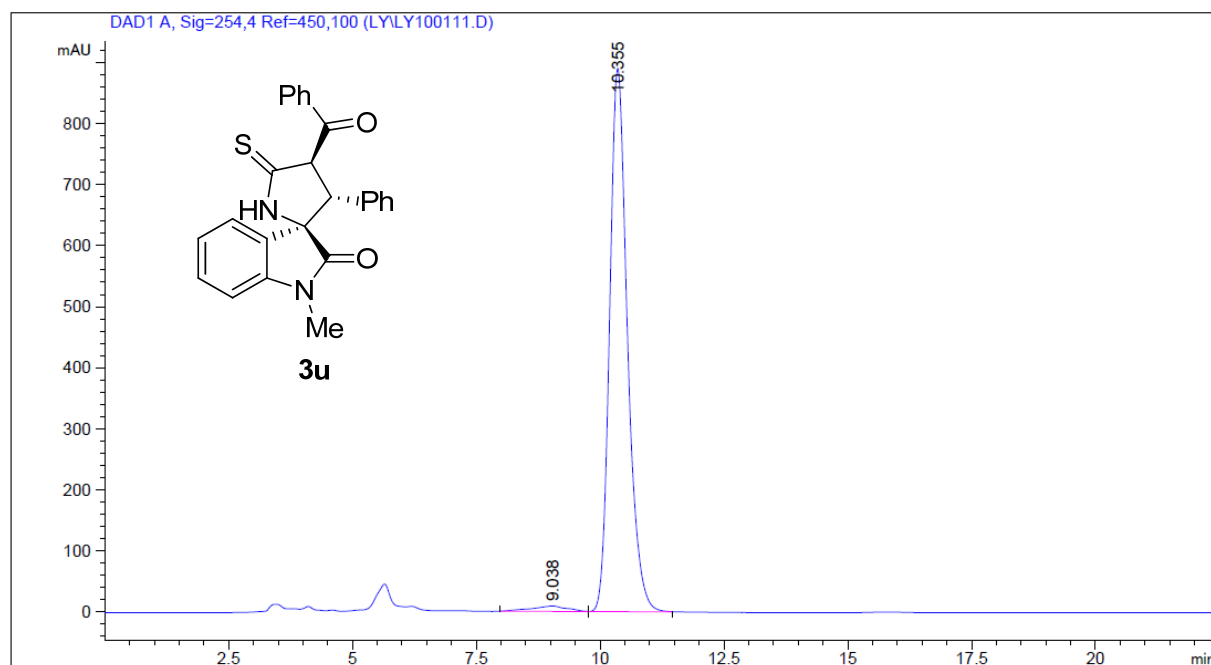

| Peak # | RetTime [min] | Type | Width [min] | Area [mAU*s] | Height [mAU] | Area %  |
|--------|---------------|------|-------------|--------------|--------------|---------|
| 1      | 9.038         | BV   | 0.6334      | 445.56345    | 9.00218      | 1.9664  |
| 2      | 10.355        | VB   | 0.3792      | 2.22130e4    | 889.80389    | 98.0336 |

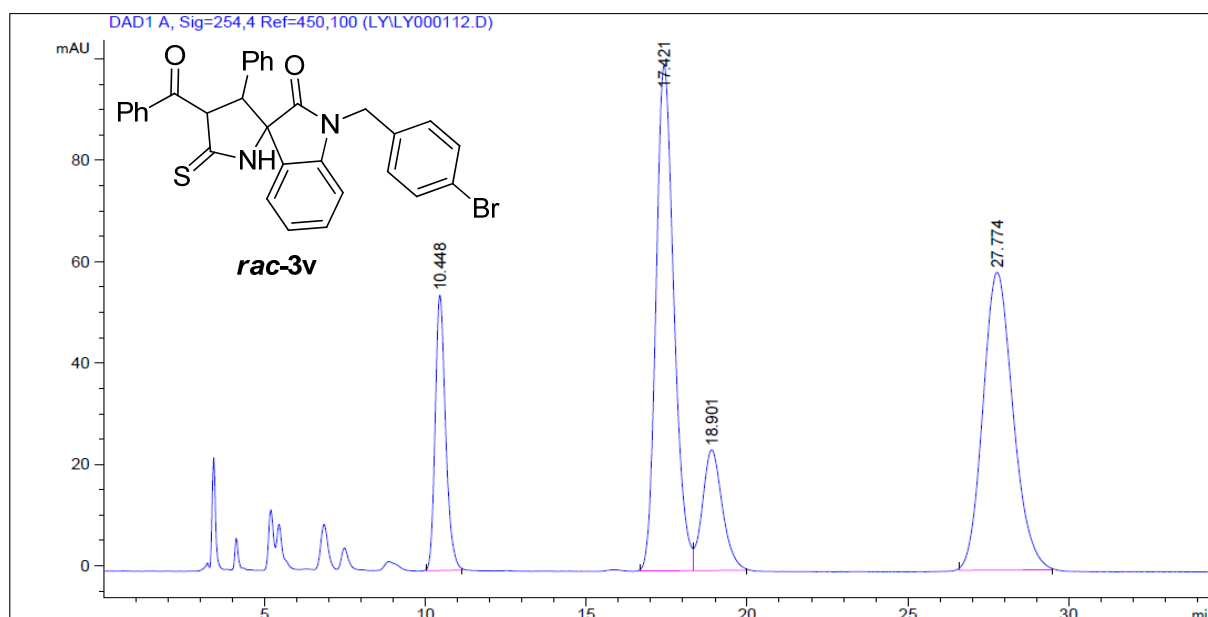

| Peak # | RetTime [min] | Type | Width [min] | Area [mAU*s] | Height [mAU] | Area %  |
|--------|---------------|------|-------------|--------------|--------------|---------|
| 1      | 10.448        | BB   | 0.3432      | 1226.01575   | 54.34480     | 12.3181 |
| 2      | 17.421        | BV   | 0.5889      | 3873.17480   | 99.77929     | 38.9149 |
| 3      | 18.901        | VB   | 0.6407      | 1029.70581   | 23.80232     | 10.3458 |
| 4      | 27.774        | BB   | 0.9613      | 3824.03198   | 58.75922     | 38.4212 |

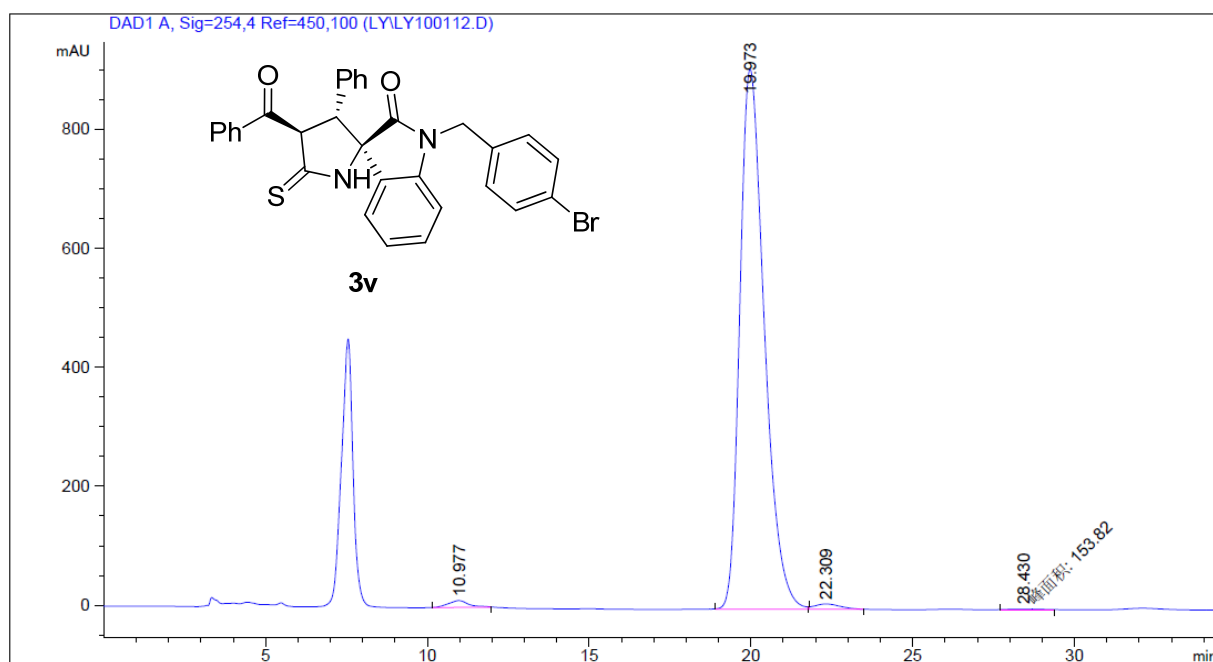

| Peak # | RetTime [min] | Type | Width [min] | Area [mAU*s] | Height [mAU] | Area %  |
|--------|---------------|------|-------------|--------------|--------------|---------|
| 1      | 10.977        | BB   | 0.6078      | 506.85223    | 11.59849     | 1.0366  |
| 2      | 19.973        | BB   | 0.8098      | 4.77443e4    | 907.49097    | 97.6437 |
| 3      | 22.309        | BB   | 0.6534      | 491.49002    | 9.02380      | 1.0052  |
| 4      | 28.430        | MM   | 1.3253      | 153.82027    | 1.93435      | 0.3146  |

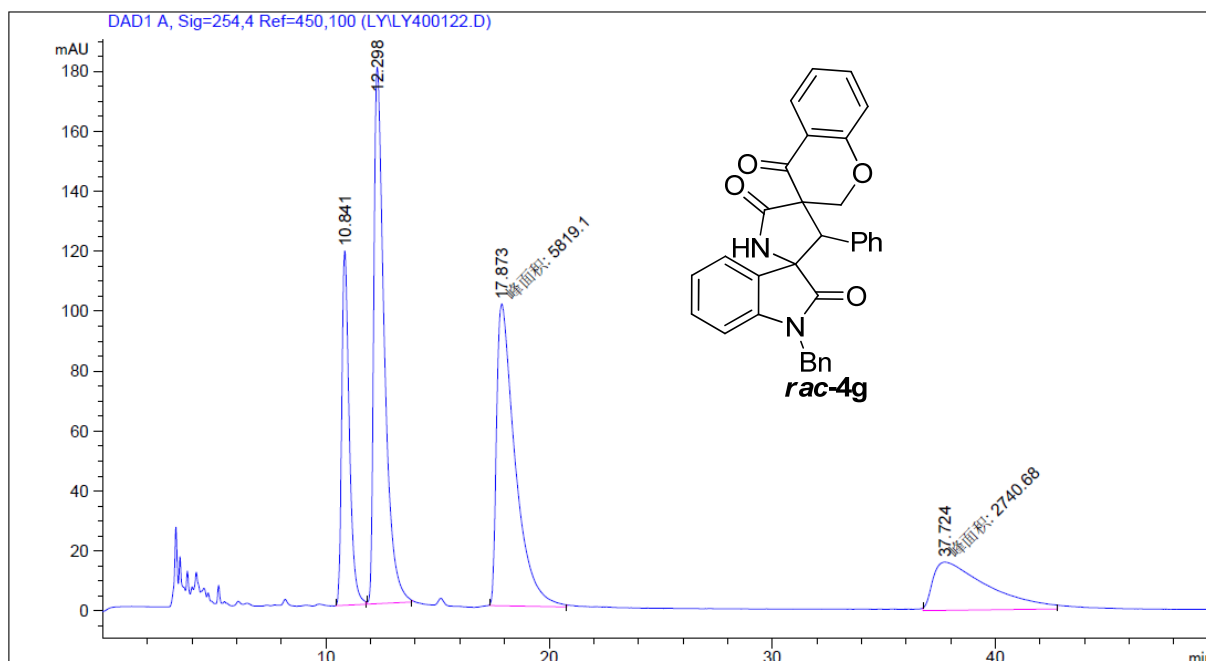

| Peak # | RetTime [min] | Type | Width [min] | Area [mAU*s] | Height [mAU] | Area %  |
|--------|---------------|------|-------------|--------------|--------------|---------|
| 1      | 10.841        | BB   | 0.3571      | 2786.95630   | 118.20641    | 16.1779 |
| 2      | 12.298        | BB   | 0.4894      | 5880.19189   | 178.94301    | 34.1337 |
| 3      | 17.873        | MM   | 0.9630      | 5819.10352   | 100.70854    | 33.7791 |
| 4      | 37.724        | MM   | 2.8407      | 2740.68262   | 16.07963     | 15.9093 |

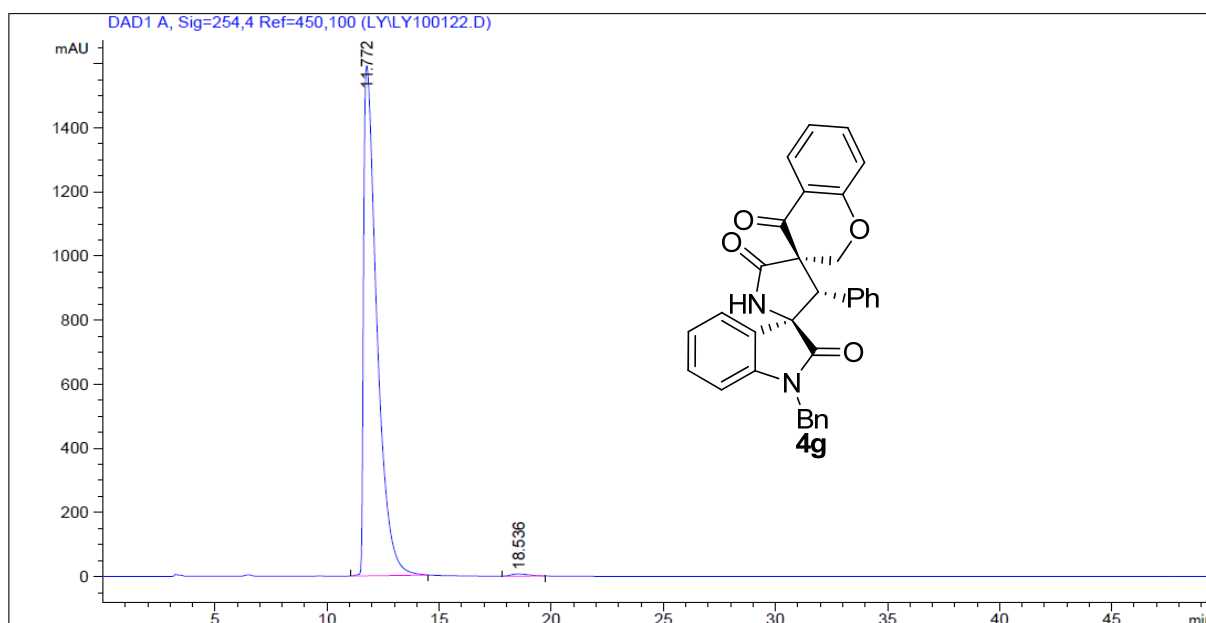

| Peak # | RetTime [min] | Type | Width [min] | Area [mAU*s] | Height [mAU] | Area %  |
|--------|---------------|------|-------------|--------------|--------------|---------|
| 1      | 11.772        | BB   | 0.6041      | 6.54983e4    | 1591.74475   | 99.4340 |
| 2      | 18.536        | BB   | 0.6433      | 372.85046    | 6.89006      | 0.5660  |

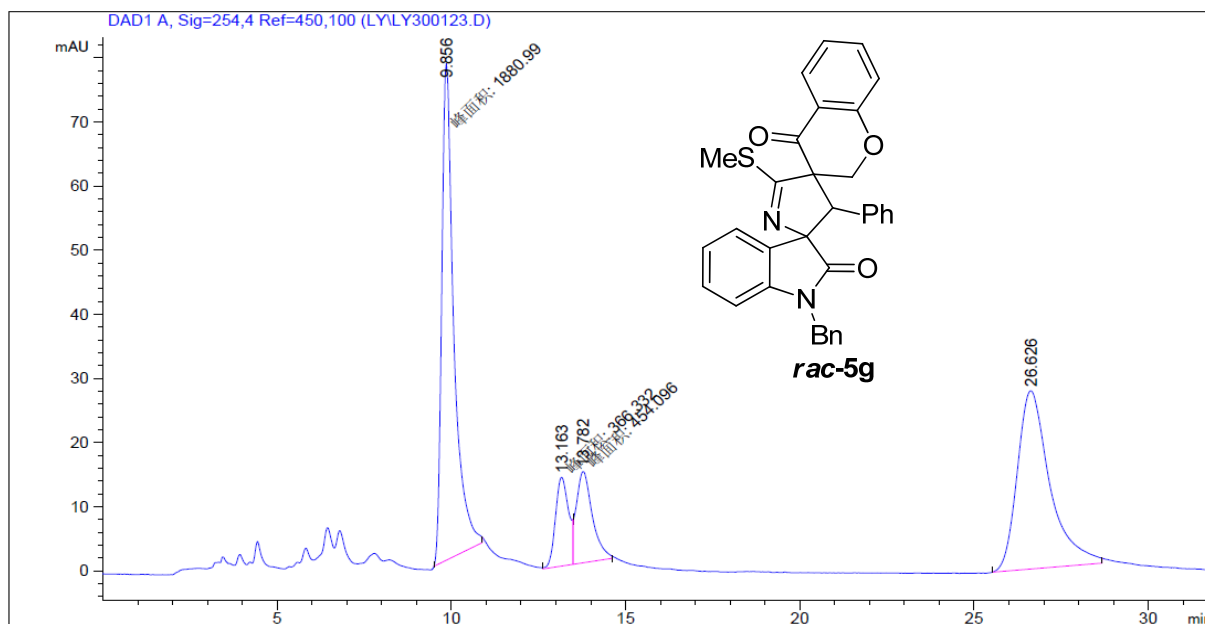

| Peak # | RetTime [min] | Type | Width [min] | Area [mAU*s] | Height [mAU] | Area %  |
|--------|---------------|------|-------------|--------------|--------------|---------|
| 1      | 9.856         | MM   | 0.4043      | 1880.98950   | 77.54160     | 41.7011 |
| 2      | 13.163        | MF   | 0.4403      | 366.33215    | 13.86557     | 8.1215  |
| 3      | 13.782        | FM   | 0.5316      | 454.09555    | 14.23680     | 10.0672 |
| 4      | 26.626        | BB   | 0.9754      | 1809.23303   | 27.79550     | 40.1102 |

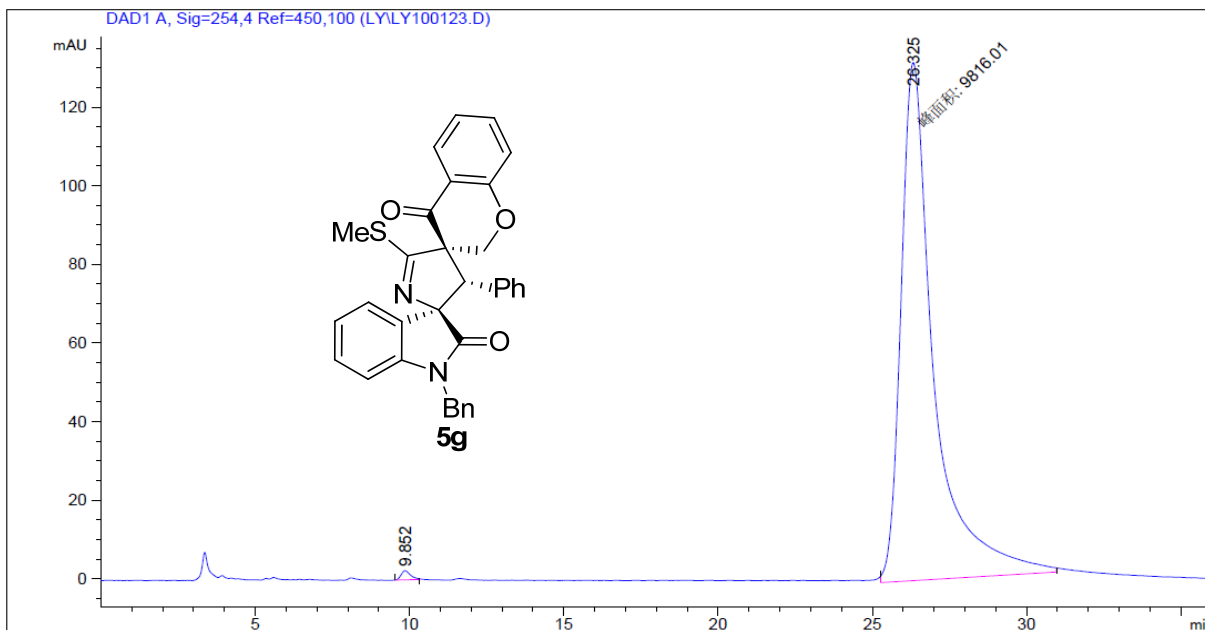

| Peak # | RetTime [min] | Type | Width [min] | Area [mAU*s] | Height [mAU] | Area %  |
|--------|---------------|------|-------------|--------------|--------------|---------|
| 1      | 9.852         | BB   | 0.2966      | 49.30463     | 2.33265      | 0.4998  |
| 2      | 26.325        | MM   | 1.2411      | 9816.00684   | 131.82187    | 99.5002 |
